# Supplementary material for: The C-3 Functionalization of 1H-Indazole through Suzuki–Miyaura Cross-Coupling Catalyzed by a Ferrocene-Based Divalent Palladium Complex Immobilized over Ionic Liquid, as Well as Theoretical Insights into the Reaction Mechanism
Source: MDPI journal article supplement (doi:10.3390/app13074095), 2023-03-23
Supplement: s1 [file s1]

## Supplementary Materials

### The C-3 Functionalization of 1*H*-Indazole through Suzuki-Miyaura Cross-Coupling Catalyzed by Ferrocene-Based Divalent Palladium Complex Immobilized over Ionic Liquid as well as Theoretical Insights into Reaction Mechanism

Jinmeng Yu <sup>1,2,3</sup>, Aqun Zheng <sup>2</sup>, Lu Jin <sup>1,\*</sup>, Yong Wu <sup>2,3</sup>, Qin Pan <sup>2,3</sup>, Xiangdong Wang <sup>2,3</sup>, Xiaoyong Li <sup>2,3</sup>, Wanqin Wang <sup>2,3</sup>, Min Gao <sup>2,3</sup>, Yang Sun <sup>2,3,\*</sup>

<sup>1</sup> College of Chemistry and Chemical Engineering, Xinjiang Agricultural University, No.311, Nongda East Road, Urumqi 830052, P.R. China

<sup>2</sup> Department of Applied Chemistry, School of Chemistry, Xi'an Jiaotong University, No. 28, Xianning West Road, Xi'an 710049, P.R. China

<sup>3</sup> Xixian New District Xingyi Advanced Materials Technology Co., Ltd., Room 1046, 1st floor, Hongdelou, Building No. 20, Science and Technology Innovation Port, Western China, Fengxi New City, Xixian New District, Xi'an 712000, Shaanxi Province, P.R. China

## Table of Contents

- S1.** <sup>1</sup>H NMR spectrum of 3-iodo-1*H*-indazole (compound **2**) (Fig. S1)
- S2.** <sup>13</sup>C NMR spectrum of 3-iodo-1*H*-indazole (compound **2**) (Fig. S2)
- S3.** <sup>1</sup>H NMR spectrum of *tert*-butyl-3-iodo-1*H*-indazole-1-carboxylate (compound **3**) (Fig. S3)
- S4.** <sup>13</sup>C NMR spectrum of *tert*-butyl-3-iodo-1*H*-indazole-1-carboxylate (compound **3**) (Fig. S4)

---

\* Corresponding authors. Tel.: +86 29 82663914; fax: +86 29 82668559.

E-mail addresses: lu\_lu\_jin@163.com (L. Jin); sunyang79@mail.xjtu.edu.cn (Y. Sun).

- S5. ESI-HRMS of *tert*-butyl-3-iodo-1*H*-indazole-1-carboxylate (compound **3**) (Fig. S5)
- S6. FT-IR spectrum of *tert*-butyl-3-iodo-1*H*-indazole-1-carboxylate (compound **3**) (Fig. S6)
- S7. <sup>1</sup>H NMR spectrum of *tert*-butyl-3-(2-furyl)-1*H*-indazole-1-carboxylate (compound **5**) (Fig. S7)
- S8. <sup>13</sup>C NMR spectrum of *tert*-butyl-3-(2-furyl)-1*H*-indazole-1-carboxylate (compound **5**) (Fig. S8)
- S9. ESI-HRMS of *tert*-butyl-3-(2-furyl)-1*H*-indazole-1-carboxylate (compound **5**) (Fig. S9)
- S10. FT-IR spectrum of ESI-HRMS of *tert*-butyl-3-(2-furyl)-1*H*-indazole-1-carboxylate (compound **5**) (Fig. S10)
- S11. <sup>1</sup>H NMR spectrum of 3-(2-furyl)-1*H*-indazole (compound **6**) (Fig. S11)
- S12. <sup>13</sup>C NMR spectrum of 3-(2-furyl)-1*H*-indazole (compound **6**) (Fig. S12)
- S13. <sup>1</sup>H NMR spectrum of *tert*-butyl-3-(4-(methoxycarbonyl)phenyl)-1*H*-indazole-1-carboxylate (compound **8**) (Fig. S13)
- S14. <sup>13</sup>C NMR spectrum of *tert*-butyl-3-(4-(methoxycarbonyl)phenyl)-1*H*-indazole-1-carboxylate (compound **8**) (Fig. S14)
- S15. ESI-HRMS of *tert*-butyl-3-(4-(methoxycarbonyl)phenyl)-1*H*-indazole-1-carboxylate (compound **8**) (Fig. S15)
- S16. FT-IR spectrum of *tert*-butyl-3-(4-(methoxycarbonyl)phenyl)-1*H*-indazole-1-carboxylate (compound **8**) (Fig. S16)
- S17. <sup>1</sup>H NMR spectrum of 4-(1*H*-indazole-3-yl)benzoic acid (compound **9**) (Fig. S17)
- S18. <sup>13</sup>C NMR spectrum of 4-(1*H*-indazole-3-yl)benzoic acid (compound **9**) (Fig. S18)
- S19. ESI-HRMS (TOF-SIMS) of 4-(1*H*-indazole-3-yl)benzoic acid (compound **9**) (Fig. S19)
- S20. <sup>1</sup>H NMR spectrum of *tert*-butyl-3-(3-(methoxycarbonyl)phenyl)-1*H*-indazole-1-carboxylate (compound **11**) (Fig. S20)
- S21. <sup>13</sup>C NMR spectrum of *tert*-butyl-3-(3-(methoxycarbonyl)phenyl)-1*H*-indazole-1-carboxylate (compound **11**) (Fig. S21)
- S22. ESI-HRMS of *tert*-butyl-3-(3-(methoxycarbonyl)phenyl)-1*H*-indazole-1-carboxylate (compound **11**) (Fig. S22)
- S23. FT-IR spectrum of *tert*-butyl-3-(3-(methoxycarbonyl)phenyl)-1*H*-indazole-1-carboxylate (compound **11**) (Fig. S23)
- S24. <sup>1</sup>H NMR spectrum of 3-(1*H*-indazole-3-yl)benzoic acid (compound **12**) (Fig. S24)
- S25. <sup>13</sup>C NMR spectrum of 3-(1*H*-indazole-3-yl)benzoic acid (compound **12**) (Fig. S25)

**S26.** ESI-HRMS (TOF-SIMS) of 3-(1*H*-indazole-3-yl)benzoic acid (compound **12**) (Fig. S26)

**S27.** Optimized structures from calculations

**S1.**  $^1\text{H}$  NMR spectrum of 3-iodo-1*H*-indazole (compound **2**)

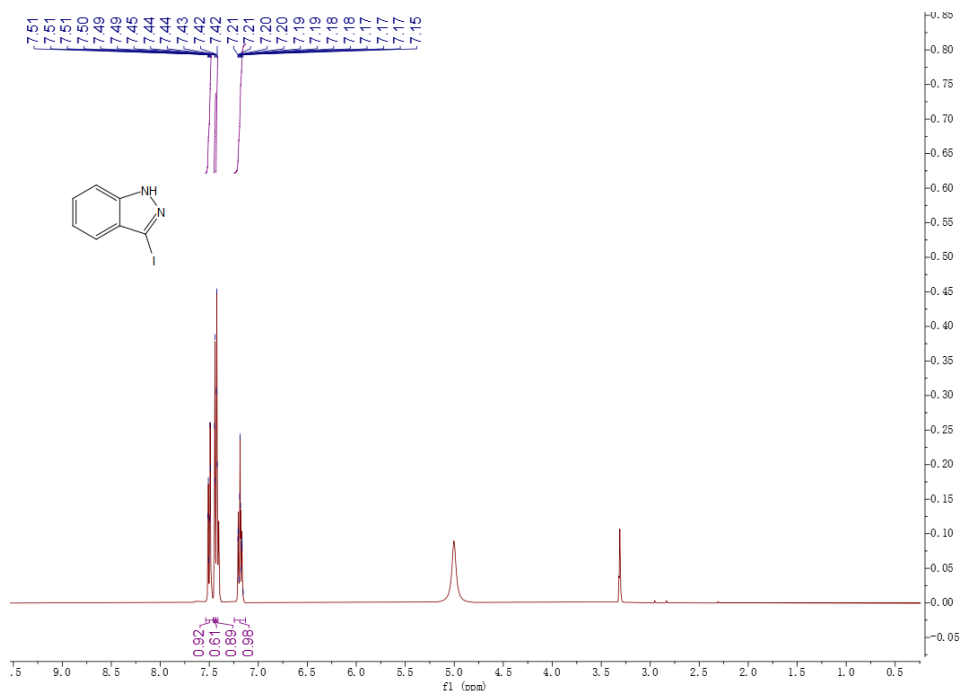

**Fig. S1.**  $^1\text{H}$  NMR spectrum of 3-iodo-1*H*-indazole (compound **2**)

$^1\text{H}$  NMR (400 MHz, Methanol- $d_4$ )  $\delta_{\text{H}}$ , ppm: 7.50 (1H, dt,  $J = 1.7, 7.4$  Hz, ArH), 7.44 (1H, d,  $J = 1.7$  Hz, ArH), 7.43 (1H, d,  $J = 1.7$  Hz, ArH), 7.19 (1H, m, ArH). Herein, the peak appeared at  $\delta_{\text{H}} = 3.31$  ppm is the solvent peak of Methanol- $d_4$ . The peak appeared at  $\delta_{\text{H}} = 5.02$  ppm means NH of compound **2** (not integrated due to influences of hydrogen bond as regular).

**S2.**  $^{13}\text{C}$  NMR spectrum of 3-iodo-1*H*-indazole (compound **2**)

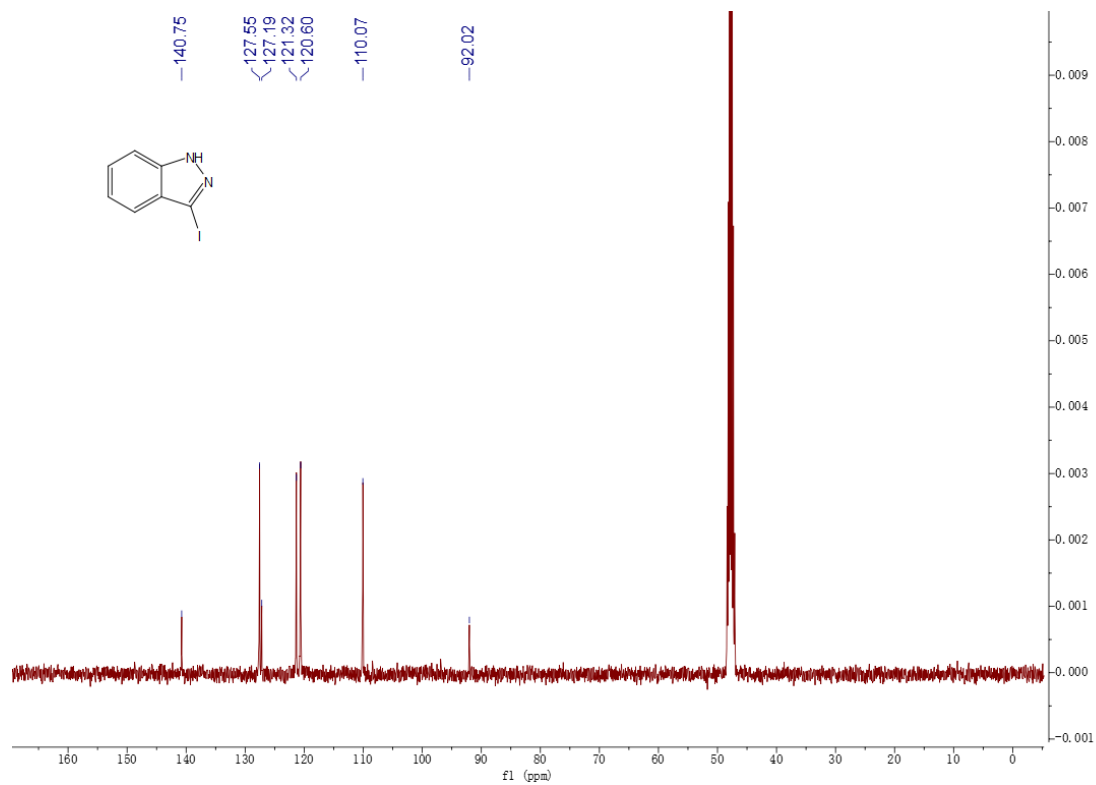

**Fig. S2.** <sup>13</sup>C NMR spectrum of 3-iodo-1*H*-indazole (compound 2)

**S3.** <sup>1</sup>H NMR spectrum of *tert*-butyl-3-iodo-1*H*-indazole-1-carboxylate (compound 3)

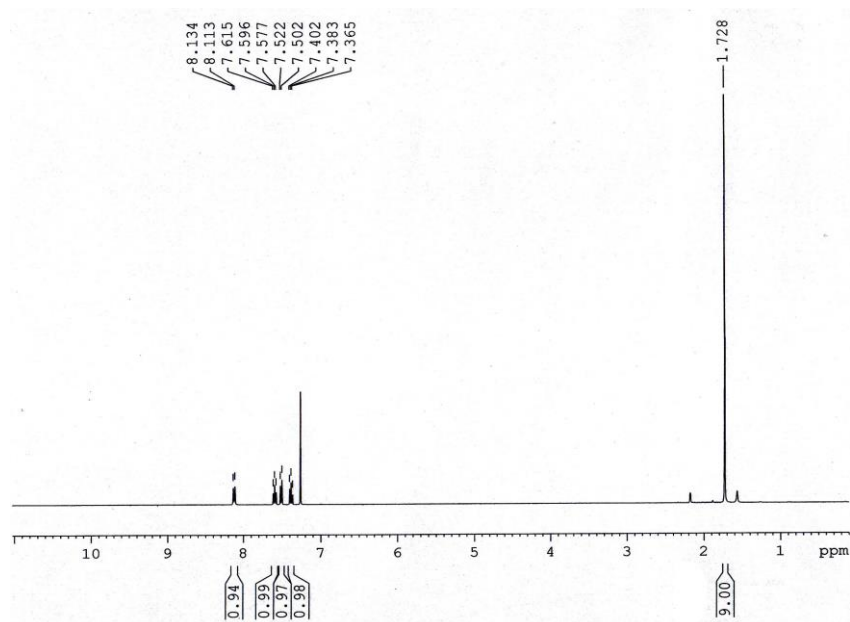

**Fig. S3.** <sup>1</sup>H NMR spectrum of *tert*-butyl-3-iodo-1*H*-indazole-1-carboxylate (compound 3)

**S4.**  $^{13}\text{C}$  NMR spectrum of *tert*-butyl-3-iodo-1*H*-indazole-1-carboxylate (compound **3**)

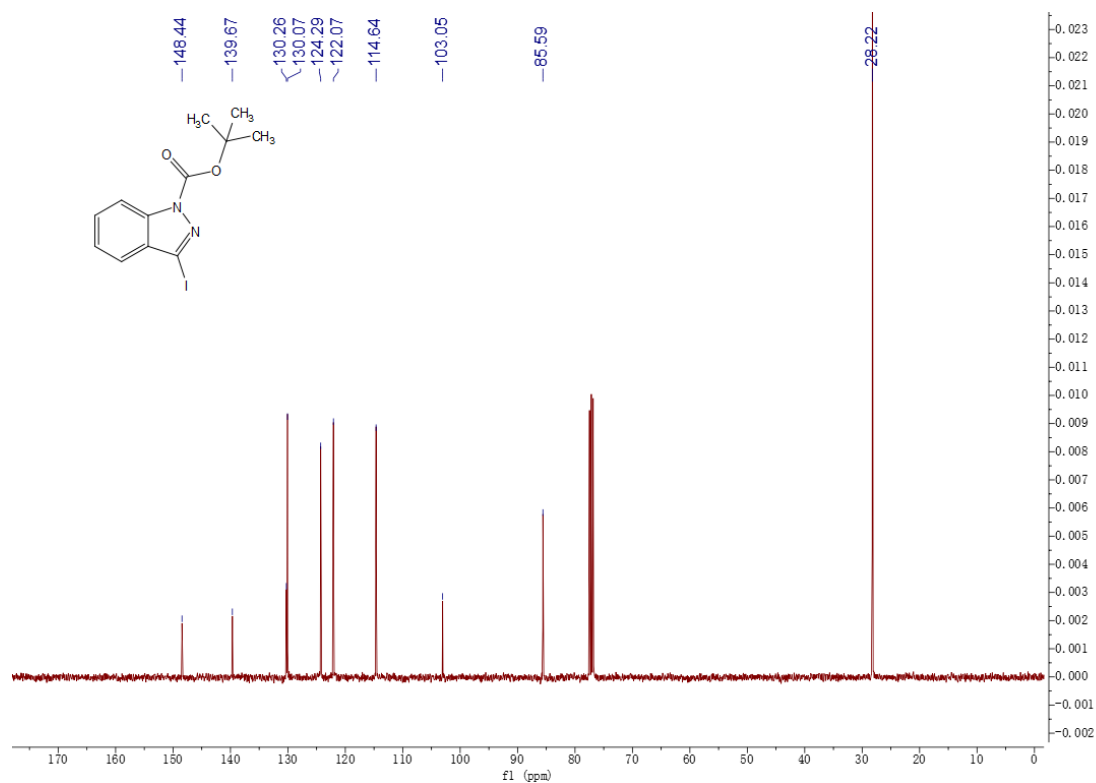

**Fig. S4.**  $^{13}\text{C}$  NMR spectrum of *tert*-butyl-3-iodo-1*H*-indazole-1-carboxylate (compound **3**)

**S5.** ESI-HRMS of  $^{13}\text{C}$  NMR spectrum of *tert*-butyl-3-iodo-1*H*-indazole-1-carboxylate (compound **3**)

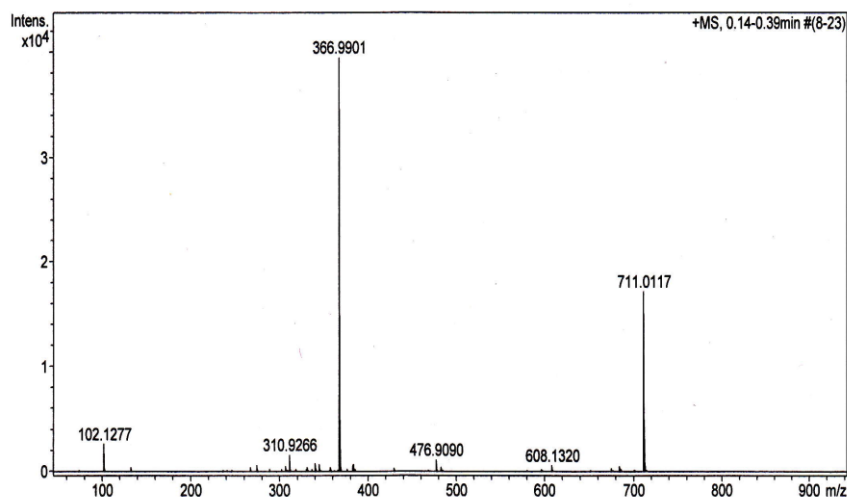

**Fig. S5.** ESI-HRMS of *tert*-butyl-3-iodo-1*H*-indazole-1-carboxylate (compound **3**)

**S6.** FT-IR spectrum of *tert*-butyl-3-iodo-1*H*-indazole-1-carboxylate (compound **3**)

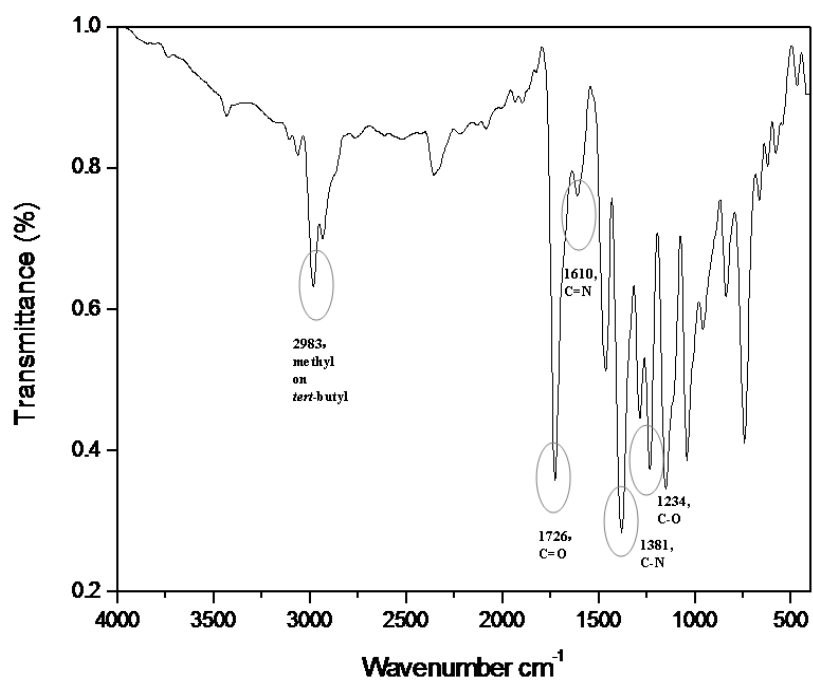

**Fig. S6.** FT-IR spectrum of *tert*-butyl-3-iodo-1*H*-indazole-1-carboxylate (compound **3**)

**S7.**  $^1\text{H}$  NMR spectrum of *tert*-butyl-3-(2-furyl)-1*H*-indazole-1-carboxylate

(compound **5**)

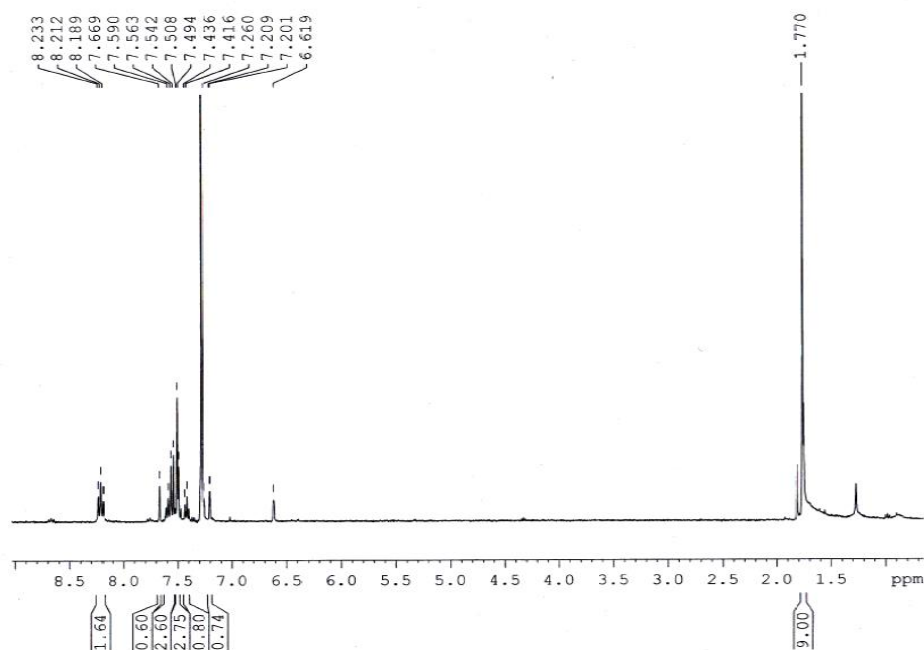

**Fig. S7.** <sup>1</sup>H NMR spectrum of *tert*-butyl-3-(2-furyl)-1*H*-indazole-1-carboxylate

(compound **5**)

**S8.** <sup>13</sup>C NMR spectrum of *tert*-butyl-3-(2-furyl)-1*H*-indazole-1-carboxylate

(compound **5**)

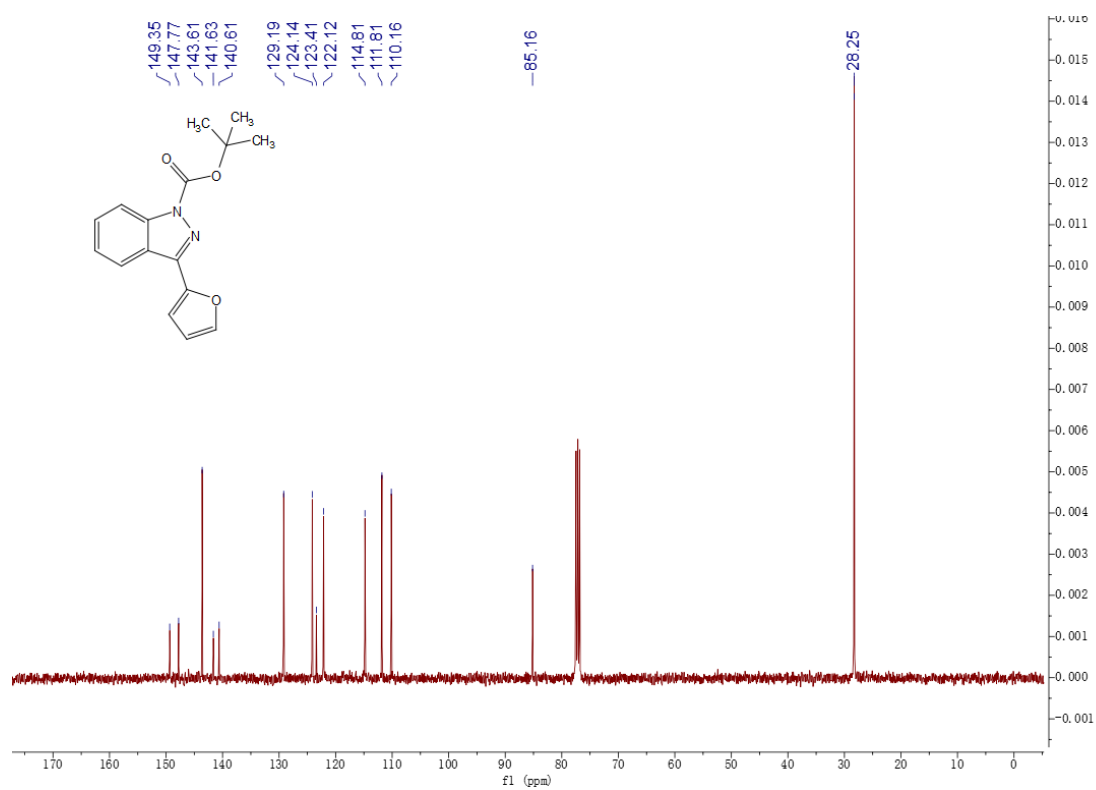

**Fig. S8.** <sup>13</sup>C NMR spectrum of *tert*-butyl-3-(2-furyl)-1*H*-indazole-1-carboxylate (compound 5)

**S9.** ESI-HRMS of *tert*-butyl-3-(2-furyl)-1*H*-indazole-1-carboxylate (compound 5)

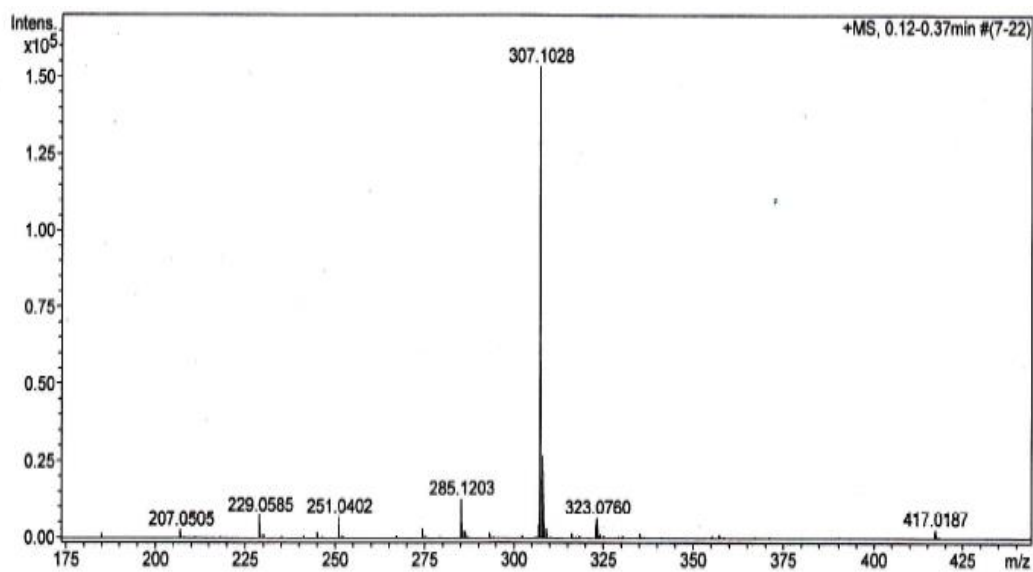

**Fig. S9.** ESI-HRMS of *tert*-butyl-3-(2-furyl)-1*H*-indazole-1-carboxylate (compound 5)



5)

**S10.** FT-IR spectrum of ESI-HRMS of *tert*-butyl-3-(2-furyl)-1*H*-indazole-1-carboxylate (compound **5**)

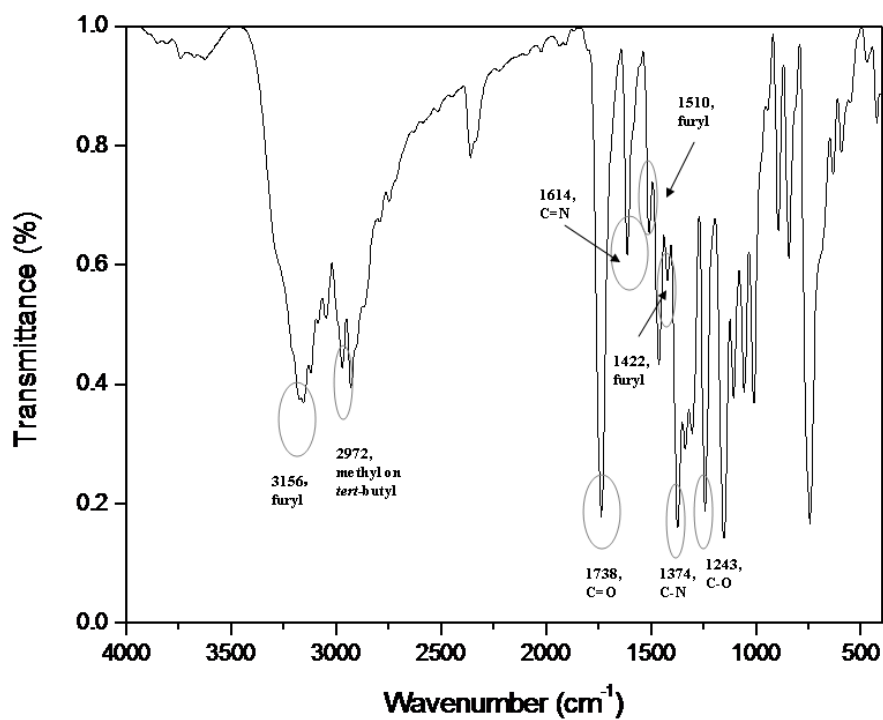

**Fig. S10.** FT-IR spectrum of ESI-HRMS of *tert*-butyl-3-(2-furyl)-1*H*-indazole-1-carboxylate (compound **5**)

**S11.** <sup>1</sup>H NMR spectrum of 3-(2-furyl)-1*H*-indazole (compound **6**)

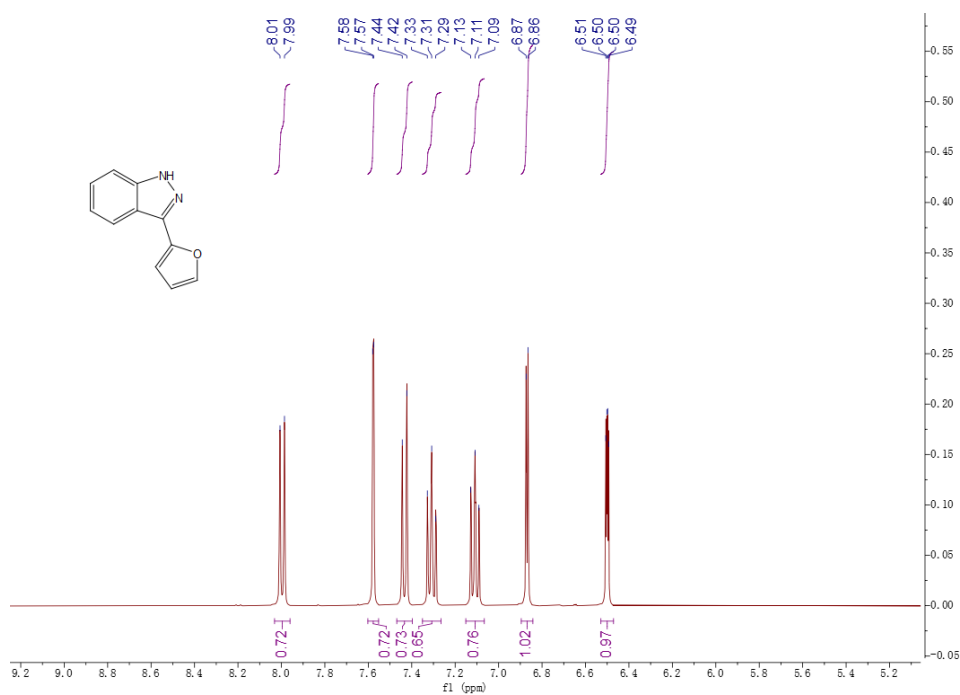

**Fig. S11.**  $^1\text{H}$  NMR spectrum of 3-(2-furyl)-1*H*-indazole (compound **6**)

$^1\text{H}$  NMR (400 MHz,  $\text{CDCl}_3$ )  $\delta_{\text{H}}$ , ppm: 8.00 (1H, d,  $J = 8.2$  Hz, Ar*H*), 7.58 (1H, d,  $J = 1.8$  Hz, Ar*H*), 7.43 (1H, d,  $J = 8.4$  Hz, *H* on furyl), 7.31 (1H, t,  $J = 7.6$  Hz, Ar*H*), 7.11 (1H, t,  $J = 7.6$  Hz, Ar*H*), 6.87 (1H, d,  $J = 3.4$  Hz, *H* on furyl), 6.50 (1H, dd,  $J = 1.8, 3.4$  Hz, *H* on furyl). Herein, the peak of *NH* of compound **6** was not found due to influences of hydrogen bond as regular.

**S12.**  $^{13}\text{C}$  NMR spectrum of 3-(2-furyl)-1*H*-indazole (compound **6**)

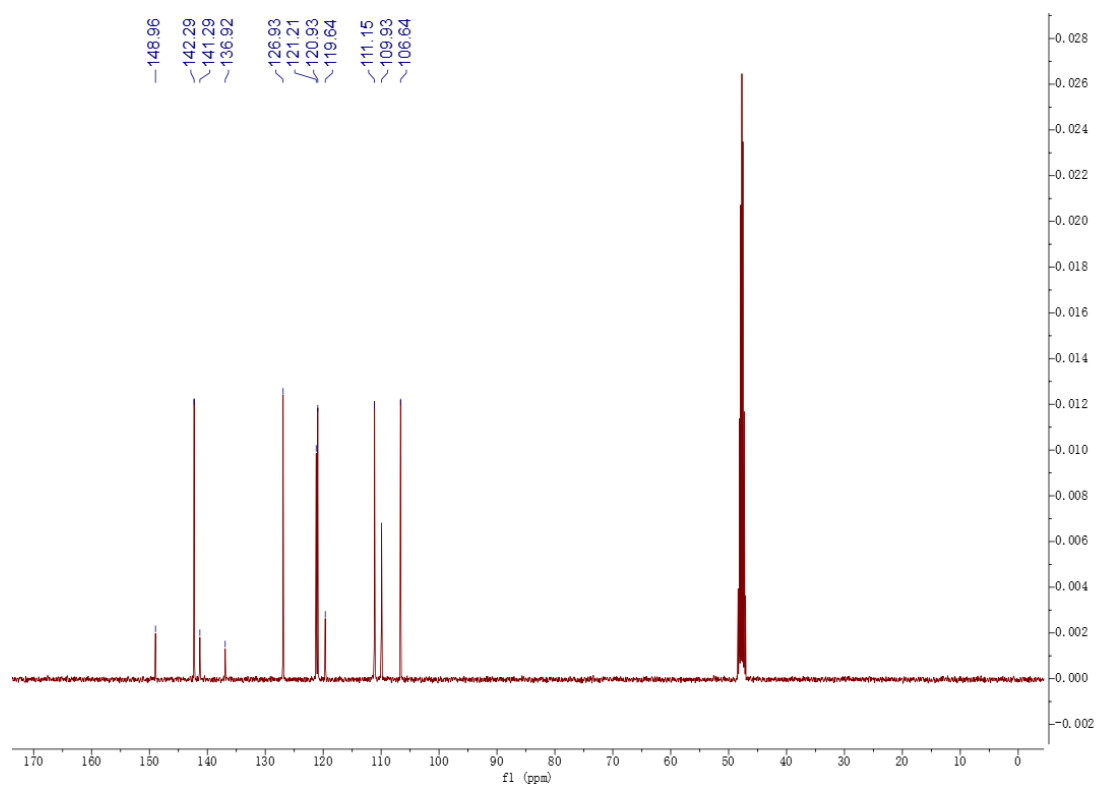

**Fig. S12.**  $^{13}\text{C}$  NMR spectrum of 3-(2-furyl)-1*H*-indazole (compound **6**)

**S13.**  $^1\text{H}$  NMR spectrum of *tert*-butyl-3-(4-(methoxycarbonyl)phenyl)-1*H*-indazole-1-carboxylate (compound **8**)

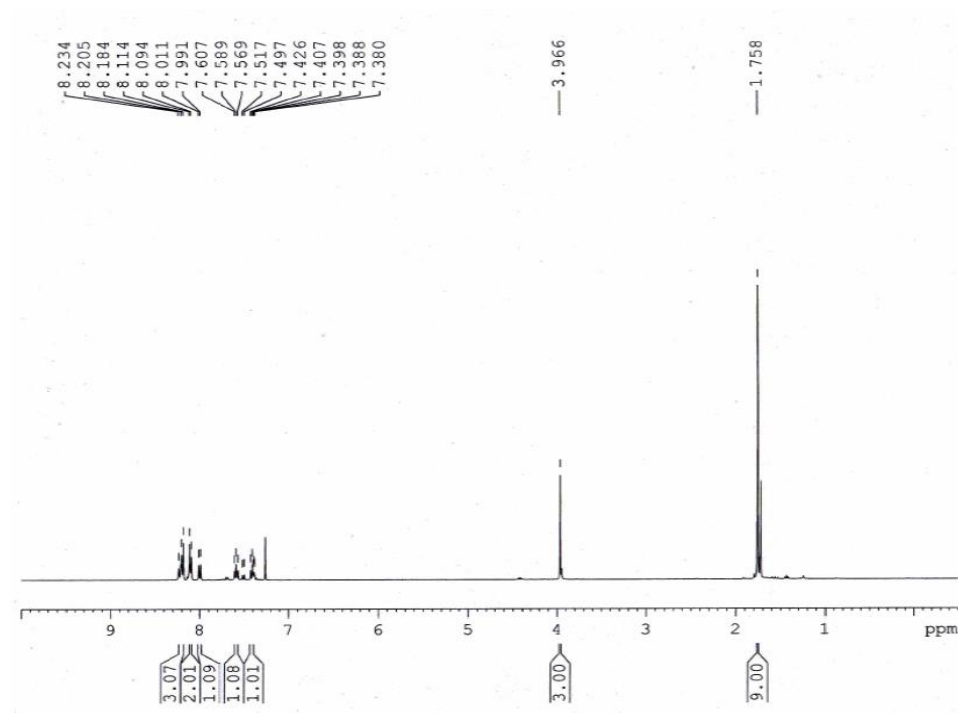

**Fig. S13.**  $^1\text{H}$  NMR spectrum of

*tert*-butyl-3-(4-(methoxycarbonyl)phenyl)-1*H*-indazole-1-carboxylate (compound **8**)

**S14.**  $^{13}\text{C}$  NMR spectrum of *tert*-butyl-3-(4-(methoxycarbonyl)phenyl)-1*H*-indazole-1-carboxylate (compound **8**)

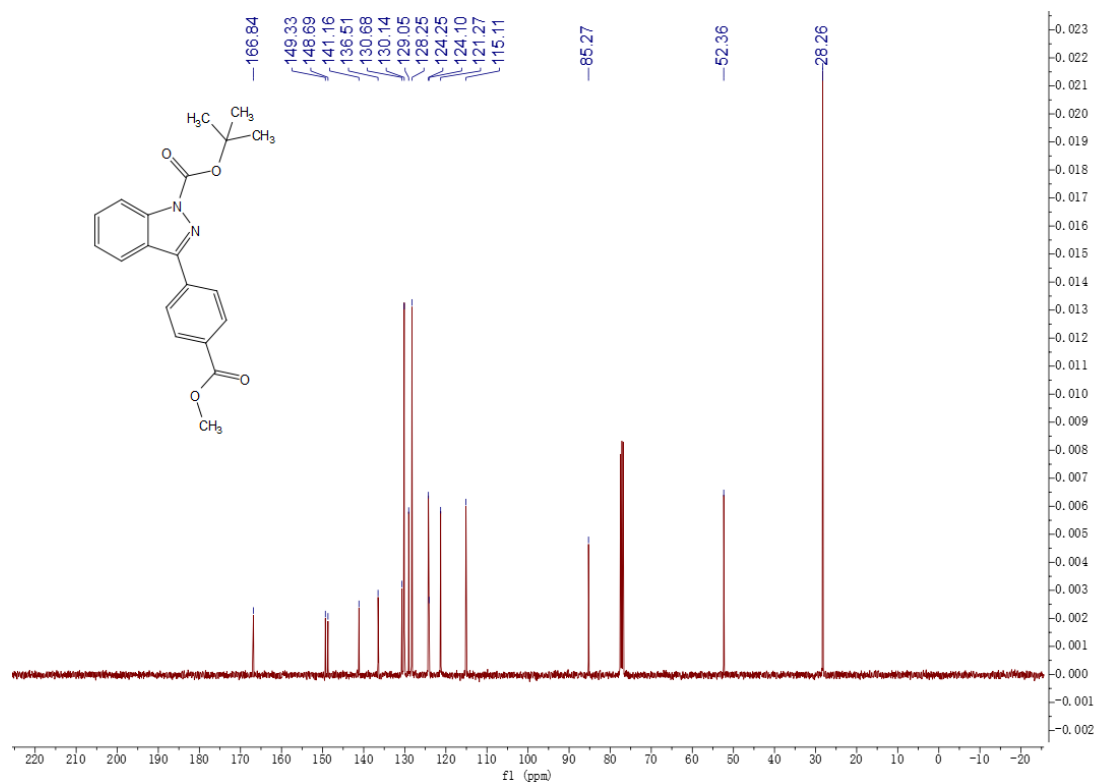

**Fig. S14.** <sup>13</sup>C NMR spectrum of

*tert*-butyl-3-(4-(methoxycarbonyl)phenyl)-1*H*-indazole-1-carboxylate (compound **8**)

**S15.** ESI-HRMS of *tert*-butyl-3-(4-(methoxycarbonyl)phenyl)-1*H*-indazole-1-carboxylate (compound **8**)

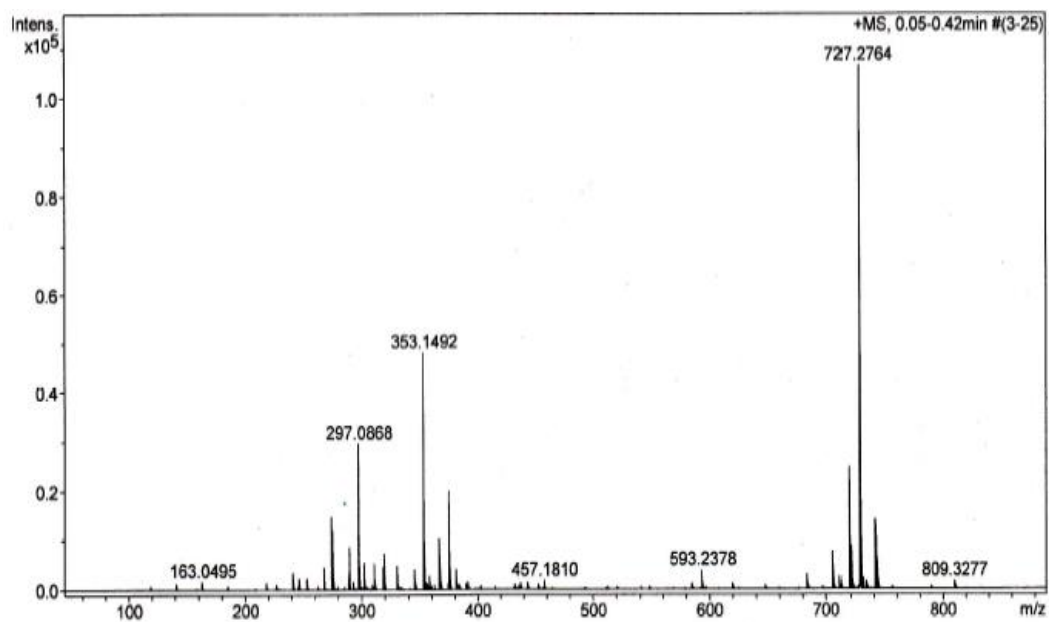

**Fig. S15.** ESI-HRMS of *tert*-butyl-3-(4-(methoxycarbonyl)phenyl)-1*H*-indazole-1-carboxylate (compound **8**)

**S16.** FT-IR spectrum of *tert*-butyl-3-(4-(methoxycarbonyl)phenyl)-1*H*-indazole-1-carboxylate (compound **8**)

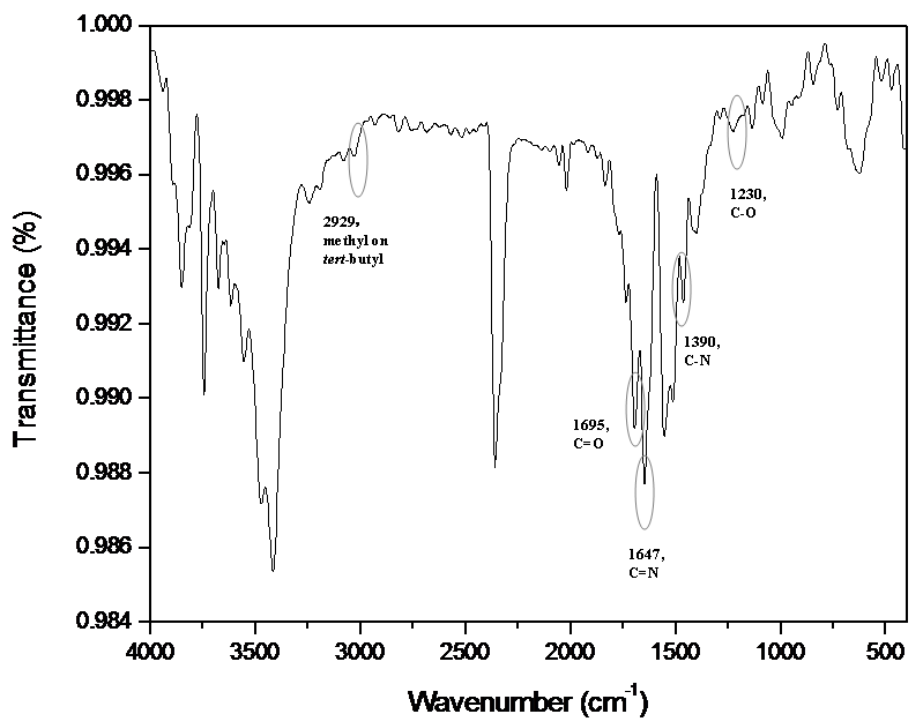

**Fig. S16.** FT-IR spectrum of

*tert*-butyl-3-(4-(methoxycarbonyl)phenyl)-1*H*-indazole-1-carboxylate (compound **8**)

**S17.** <sup>1</sup>H NMR spectrum of 4-(1*H*-indazole-3-yl)benzoic acid (compound **9**)

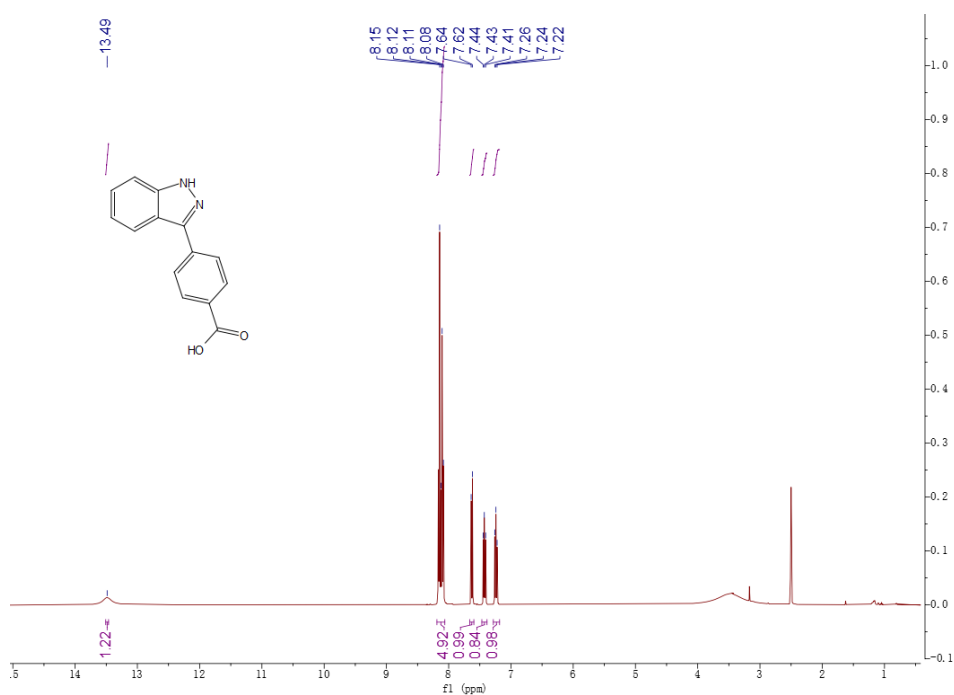

**Fig. S17.**  $^1\text{H}$  NMR spectrum of 4-(1*H*-indazole-3-yl)benzoic acid (compound **9**)

$^1\text{H}$  NMR (400 MHz,  $\text{DMSO-}d_6$ )  $\delta_{\text{H}}$ , ppm: 13.49 (1H, s, COOH), 8.11 (5H, dd,  $J = 8.3, 16.0$  Hz, ArH), 7.63 (1H, d,  $J = 8.4$  Hz, ArH), 7.43 (1H, m, ArH), 7.24 (1H, m, ArH). Herein, the peak appeared at  $\delta_{\text{H}} = 2.50$  ppm means the solvent peak of  $\text{DMSO-}d_6$ . the peak of NH of compound **9** was not found due to influences of hydrogen bond as regular.

**S18.**  $^{13}\text{C}$  NMR spectrum of 4-(1*H*-indazole-3-yl)benzoic acid (compound **9**)

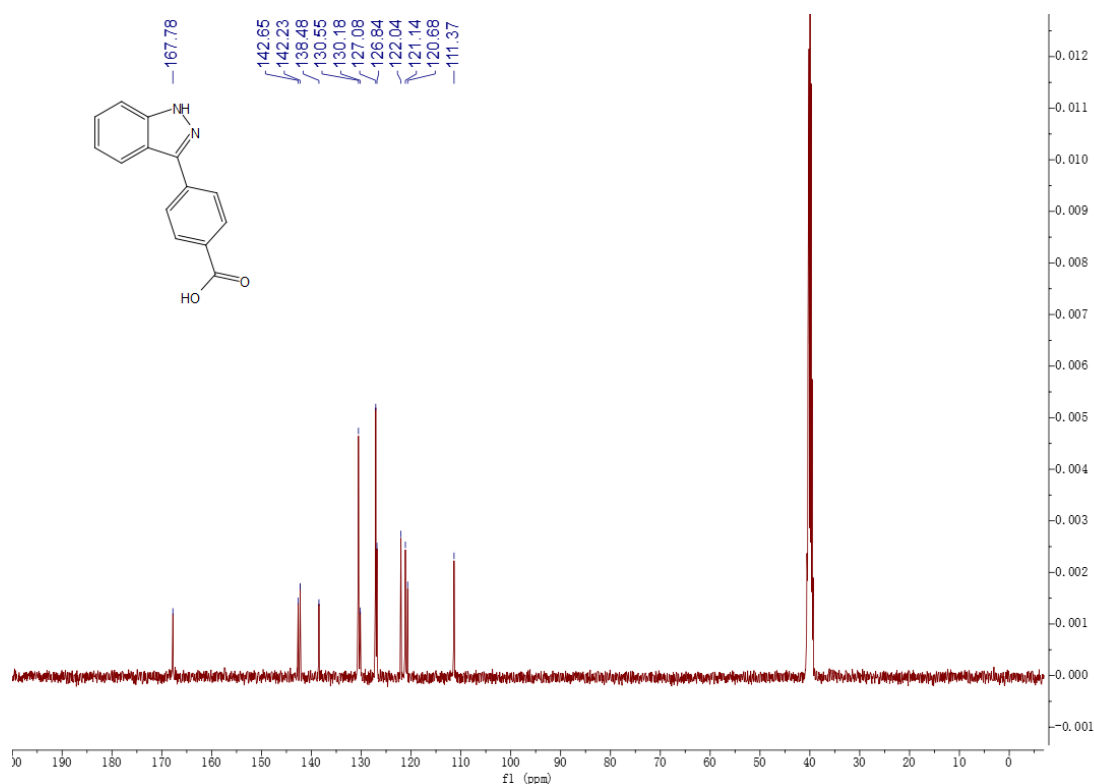

**Fig. S18.**  $^{13}\text{C}$  NMR spectrum of 4-(1*H*-indazole-3-yl)benzoic acid (compound **9**)

**S19.** ESI-HRMS (TOF-SIMS) of 4-(1*H*-indazole-3-yl)benzoic acid (compound **9**)



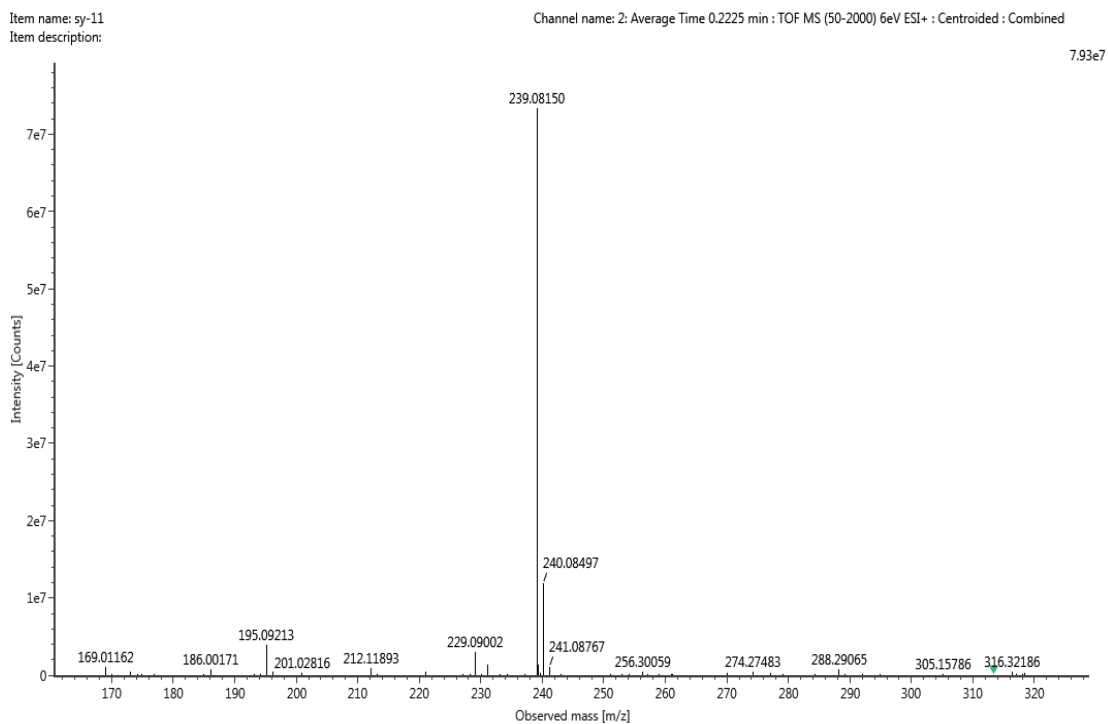

**Fig. S19.** ESI-HRMS (TOF-SIMS) of 4-(1*H*-indazole-3-yl)benzoic acid (compound **9**)

**S20.**  $^1\text{H}$  NMR spectrum of *tert*-butyl-3-(3-(methoxycarbonyl)phenyl)-1*H*-indazole-1-carboxylate (compound **11**)

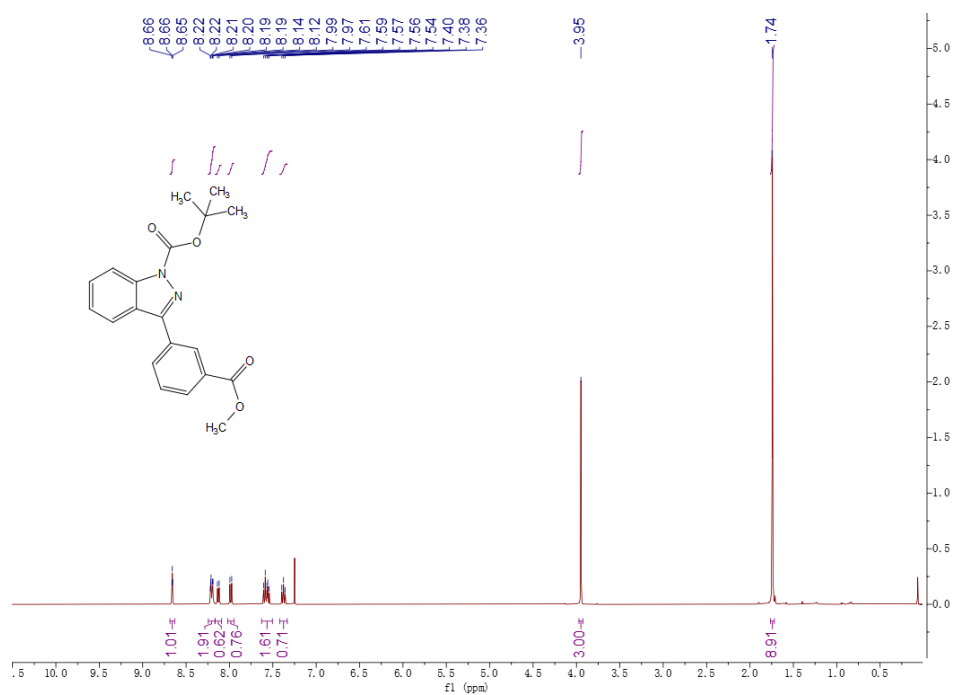

**Fig. S20.** <sup>1</sup>H NMR spectrum of

*tert*-butyl-3-(3-(methoxycarbonyl)phenyl)-1*H*-indazole-1-carboxylate (compound **11**)

**S21.** <sup>13</sup>C NMR spectrum of

*tert*-butyl-3-(3-(methoxycarbonyl)phenyl)-1*H*-indazole-1-carboxylate (compound **11**)

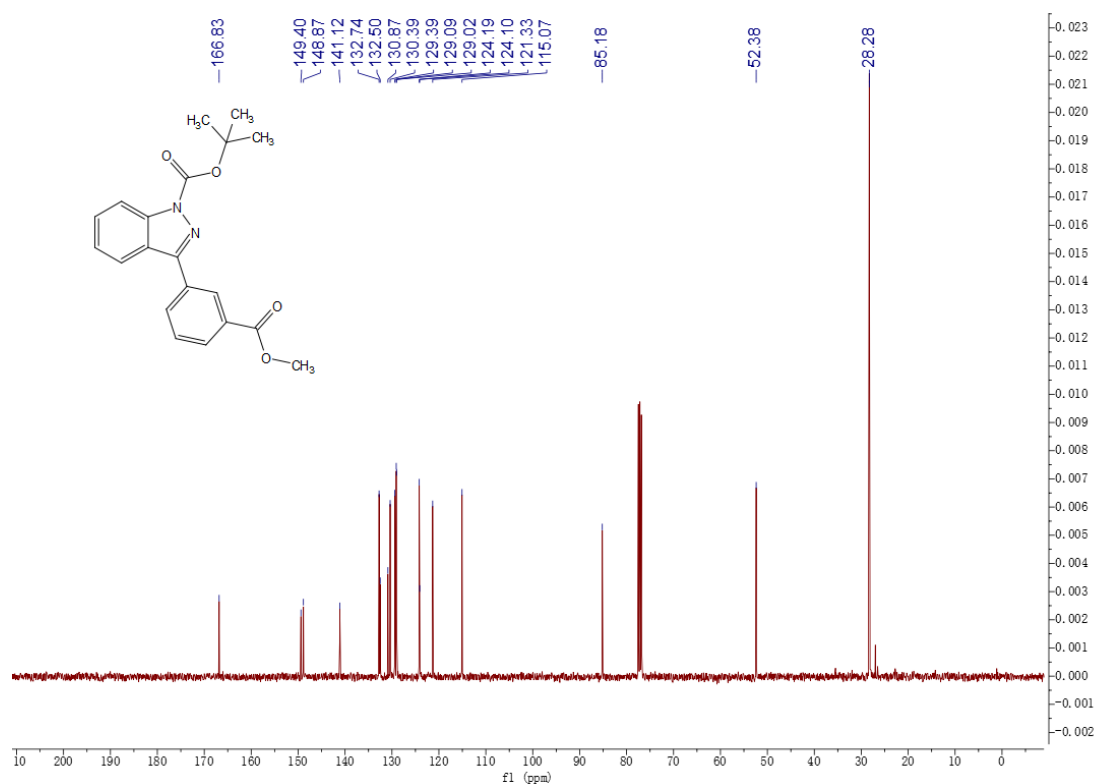

**Fig. S21.** <sup>13</sup>C NMR spectrum of

*tert*-butyl-3-(3-(methoxycarbonyl)phenyl)-1*H*-indazole-1-carboxylate (compound **11**)

**S22.**

ESI-HRMS

of

*tert*-butyl-3-(3-(methoxycarbonyl)phenyl)-1*H*-indazole-1-carboxylate (compound **11**)

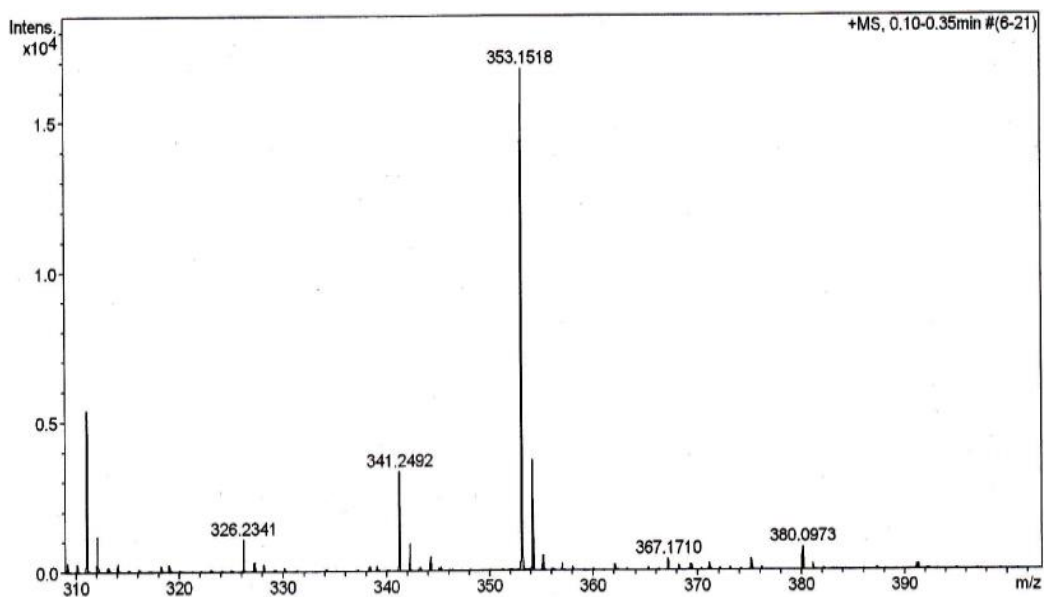

**Fig. S22.** ESI-HRMS of

*tert*-butyl-3-(3-(methoxycarbonyl)phenyl)-1*H*-indazole-1-carboxylate (compound **11**)

**S23.** FT-IR spectrum of

*tert*-butyl-3-(3-(methoxycarbonyl)phenyl)-1*H*-indazole-1-carboxylate (compound **11**)

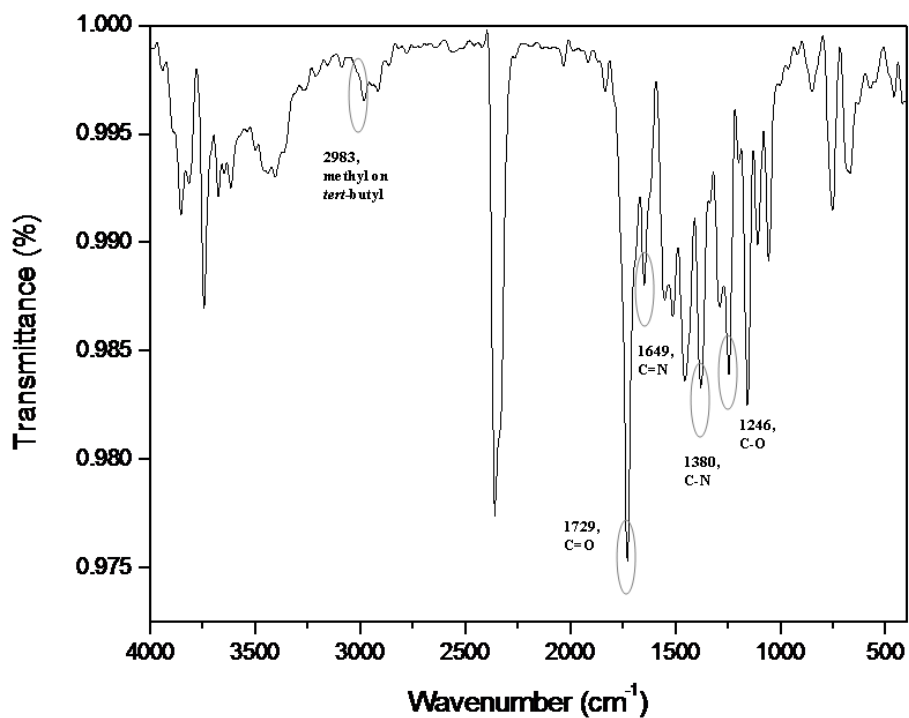

**Fig. S23.** FT-IR spectrum of

*tert*-butyl-3-(3-(methoxycarbonyl)phenyl)-1*H*-indazole-1-carboxylate (compound **11**)

**S24.**  $^1\text{H}$  NMR spectrum of 3-(1*H*-indazole-3-yl)benzoic acid (compound **12**)

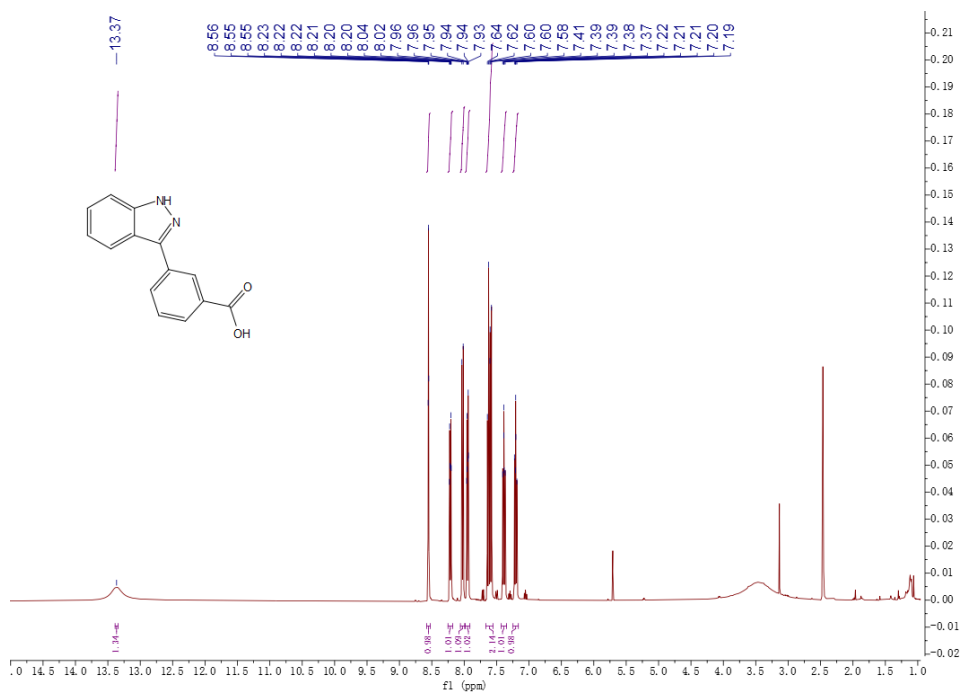

**Fig. S24.**  $^1\text{H}$  NMR spectrum of 3-(1*H*-indazole-3-yl)benzoic acid (compound **12**)

**S25.**  $^{13}\text{C}$  NMR spectrum of 3-(1*H*-indazole-3-yl)benzoic acid (compound **12**)

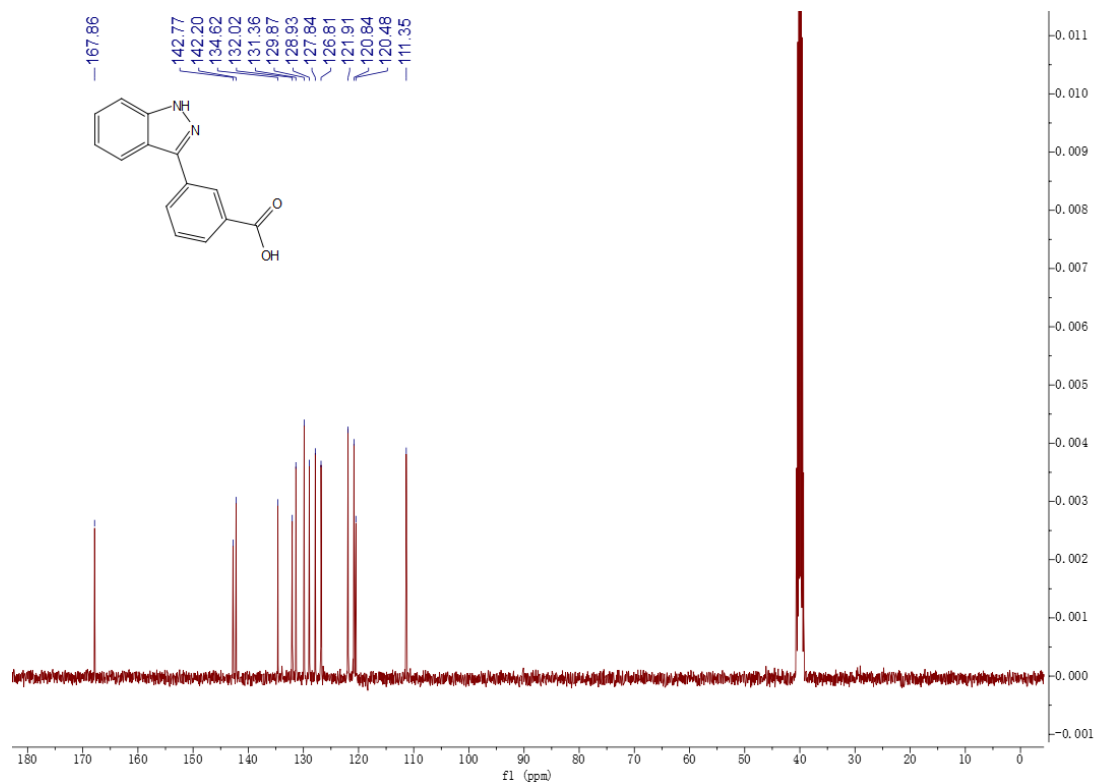

**Fig. S25.** <sup>13</sup>C NMR spectrum of 3-(1*H*-indazole-3-yl)benzoic acid (compound **12**)

## S26. ESI-HRMS (TOF-SIMS) of 3-(1*H*-indazole-3-yl)benzoic acid (compound **12**)

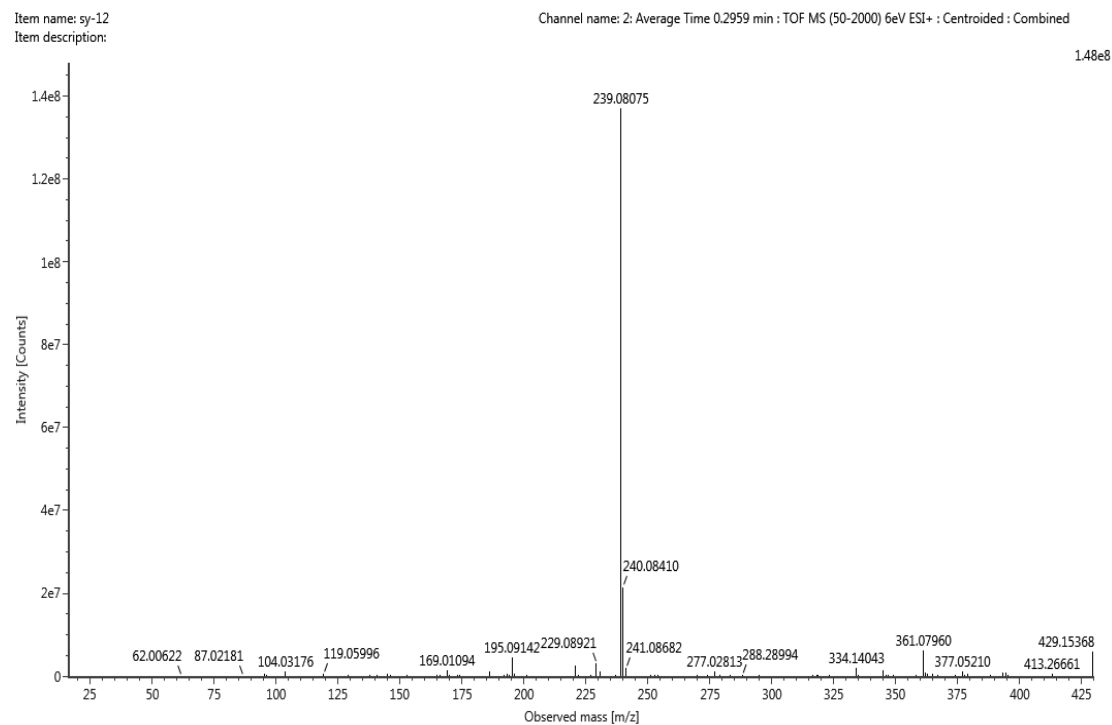

**Fig. S26.** ESI-HRMS (TOF-SIMS) of 3-(1*H*-indazole-3-yl)benzoic acid (compound

12)

## S27. Optimized structures from calculations

Optimized structures

(1) **L = dtbpf**

**Precatalyst**

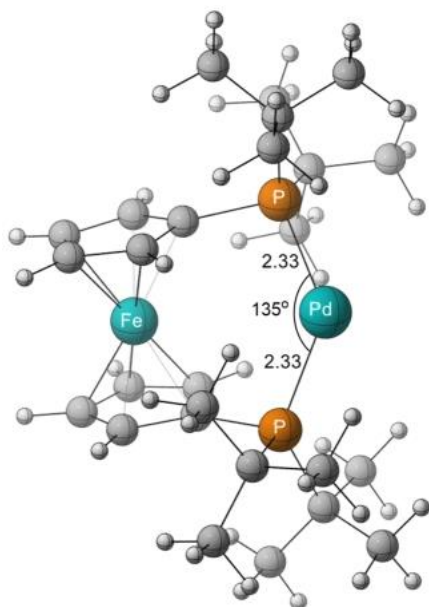

E(RB3LYP) = -3090.52827858

Zero-point correction= 0.640075 (Hartree/Particle)

Thermal correction to Energy= 0.676758

Thermal correction to Enthalpy= 0.677702

Thermal correction to Gibbs Free Energy= 0.577020

Sum of electronic and zero-point Energies= -3089.888203

Sum of electronic and thermal Energies= -3089.851521

Sum of electronic and thermal Enthalpies= -3089.850577

Sum of electronic and thermal Free Energies= -3089.951259

|   |            |            |             |
|---|------------|------------|-------------|
| C | 1.11643200 | 1.50456000 | 1.58817800  |
| C | 1.03252600 | 2.92609400 | 1.66290700  |
| C | 1.61312400 | 3.45560400 | 0.47285300  |
| C | 2.07033100 | 2.35903900 | -0.32124600 |
| C | 1.78375400 | 1.12839200 | 0.36548200  |
| H | 0.72128200 | 0.81651400 | 2.33016500  |
| H | 0.57613200 | 3.49909700 | 2.47072100  |

|    |             |             |             |
|----|-------------|-------------|-------------|
| H  | 1.68237600  | 4.50956100  | 0.20049100  |
| H  | 2.55230300  | 2.46504500  | -1.29065200 |
| Fe | 0.00000600  | 2.22998100  | 0.00022900  |
| C  | -1.03343600 | 2.92684600  | -1.66171900 |
| C  | -1.61343300 | 3.45565400  | -0.47106000 |
| C  | -1.11715600 | 1.50527200  | -1.58770500 |
| H  | -0.57760500 | 3.50032700  | -2.46951000 |
| C  | -2.07007100 | 2.35861000  | 0.32269700  |
| H  | -1.68254800 | 4.50945700  | -0.19806500 |
| C  | -1.78371700 | 1.12834000  | -0.36484300 |
| H  | -0.72235300 | 0.81771600  | -2.33033800 |
| H  | -2.55136400 | 2.46405200  | 1.29249400  |
| P  | -2.15719900 | -0.65399800 | 0.02987800  |
| P  | 2.15713800  | -0.65370800 | -0.03021100 |
| Pd | 0.00003100  | -1.54267900 | -0.00069600 |
| C  | -3.49171800 | -1.06319400 | -1.33002500 |
| C  | -4.28635800 | -2.32581800 | -0.94672800 |
| H  | -4.88973300 | -2.64722300 | -1.81684900 |
| H  | -3.62246700 | -3.16666600 | -0.67773500 |
| H  | -4.98719800 | -2.15251500 | -0.11483000 |
| C  | -4.46311200 | 0.09675700  | -1.61526000 |
| H  | -5.06519700 | 0.37147400  | -0.73481300 |
| H  | -3.93211500 | 0.99922700  | -1.96089600 |
| H  | -5.16642600 | -0.20303000 | -2.41665300 |
| C  | -2.71409600 | -1.39252900 | -2.62287200 |
| H  | -3.42941900 | -1.71148700 | -3.40520200 |
| H  | -2.16543600 | -0.52395100 | -3.01873500 |
| H  | -1.99012000 | -2.21101700 | -2.46265300 |
| C  | -2.98425500 | -0.68240700 | 1.77841100  |
| C  | -4.33972200 | 0.03943000  | 1.88887200  |
| H  | -4.66805500 | 0.04081800  | 2.94630300  |
| H  | -4.29287100 | 1.08945500  | 1.55677400  |
| H  | -5.12855200 | -0.46495300 | 1.30774500  |
| C  | -1.98250400 | -0.06348000 | 2.77684800  |
| H  | -1.01527600 | -0.59396700 | 2.73890600  |
| H  | -1.79114700 | 1.00449500  | 2.59910400  |
| H  | -2.38832200 | -0.16685200 | 3.80116800  |
| C  | -3.15207100 | -2.15978100 | 2.20271300  |
| H  | -3.47265700 | -2.19416300 | 3.26139600  |
| H  | -3.90898600 | -2.69808900 | 1.61475600  |
| H  | -2.19719500 | -2.70925800 | 2.11947600  |
| C  | 2.98481900  | -0.68105300 | -1.77835100 |
| C  | 1.98391300  | -0.06082500 | -2.77680700 |



|   |            |             |             |
|---|------------|-------------|-------------|
| H | 1.01637800 | -0.59079000 | -2.73981100 |
| H | 1.79314100 | 1.00714400  | -2.59831200 |
| H | 2.39019300 | -0.16362600 | -3.80100600 |
| C | 3.15221400 | -2.15821100 | -2.20355300 |
| H | 2.19690700 | -2.70713200 | -2.12162600 |
| H | 3.47388800 | -2.19201300 | -3.26192600 |
| H | 3.90814900 | -2.69744100 | -1.61516400 |
| C | 4.34068300 | 0.04025900  | -1.88745900 |
| H | 4.29414700 | 1.08996400  | -1.55430400 |
| H | 5.12899100 | -0.46508500 | -1.30644700 |
| H | 4.66953200 | 0.04258300  | -2.94472600 |
| C | 3.49130600 | -1.06412300 | 1.32967400  |
| C | 4.46305200 | 0.09537000  | 1.61562600  |
| H | 3.93232700 | 0.99786100  | 1.96163100  |
| H | 5.16616700 | -0.20504200 | 2.41695900  |
| H | 5.06534400 | 0.37029900  | 0.73537900  |
| C | 4.28565700 | -2.32672500 | 0.94572300  |
| H | 4.98626500 | -2.15324700 | 0.11365600  |
| H | 4.88924000 | -2.64850200 | 1.81556100  |
| H | 3.62154700 | -3.16737300 | 0.67664600  |
| C | 2.71340400 | -1.39394700 | 2.62223000  |
| H | 3.42851100 | -1.71370500 | 3.40443100  |
| H | 2.16507100 | -0.52539700 | 3.01860100  |
| H | 1.98910000 | -2.21202700 | 2.46141000  |

### Substrate 3

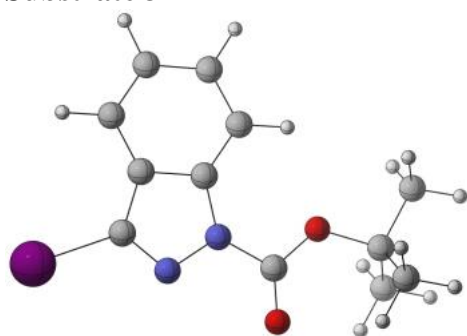

E(RB3LYP) = -1022.30944128

Zero-point correction= 0.233336 (Hartree/Particle)

Thermal correction to Energy= 0.249463

Thermal correction to Enthalpy= 0.250407

Thermal correction to Gibbs Free Energy= 0.187522

Sum of electronic and zero-point Energies= -1022.076105

Sum of electronic and thermal Energies= -1022.059979

Sum of electronic and thermal Enthalpies= -1022.059034

Sum of electronic and thermal Free Energies= -1022.121919

|   |             |             |             |
|---|-------------|-------------|-------------|
| C | 0.34844600  | 1.10195600  | 0.00019600  |
| C | -1.06543100 | 1.20090600  | 0.00016200  |
| C | -1.70244200 | 2.45329100  | 0.00001900  |
| C | -0.90491800 | 3.59151800  | -0.00010100 |
| C | 0.50473700  | 3.48481500  | -0.00000600 |
| C | 1.15494700  | 2.25282600  | 0.00016800  |
| C | -1.50565700 | -0.16893200 | 0.00014000  |
| H | -2.79359000 | 2.52205700  | -0.00000400 |
| H | -1.36857500 | 4.58196300  | -0.00026500 |
| H | 1.10725100  | 4.39812600  | -0.00003500 |
| H | 2.24081300  | 2.18654600  | 0.00032600  |
| N | -0.51293200 | -1.01191700 | 0.00020800  |
| N | 0.63366100  | -0.26672500 | 0.00034700  |
| C | 1.86794500  | -0.96559400 | 0.00029700  |
| O | 2.86878300  | -0.09757000 | 0.00039300  |
| O | 1.92532900  | -2.16845200 | 0.00027700  |
| C | 4.29197200  | -0.52223400 | -0.00015000 |
| C | 5.04112900  | 0.81088200  | -0.00025900 |
| H | 4.78789300  | 1.40238400  | 0.89619400  |
| H | 6.12894900  | 0.62815200  | -0.00061100 |
| H | 4.78732900  | 1.40254800  | -0.89644400 |
| C | 4.58732000  | -1.31743300 | 1.27411200  |
| H | 4.04203600  | -2.27314300 | 1.28913400  |
| H | 5.66893600  | -1.53081500 | 1.32721900  |
| H | 4.30919500  | -0.73203600 | 2.16783100  |
| C | 4.58650200  | -1.31712300 | -1.27478500 |
| H | 4.30772200  | -0.73156700 | -2.16819700 |
| H | 5.66810900  | -1.53034900 | -1.32864600 |
| H | 4.04134500  | -2.27290700 | -1.28965800 |
| I | -3.49722100 | -0.84153900 | -0.00009100 |

### Substrate 6

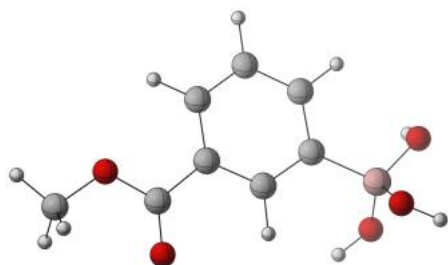

E(RB3LYP) = -711.551217003

Zero-point correction= 0.178756 (Hartree/Particle)

Thermal correction to Energy= 0.193098

|                                              |             |
|----------------------------------------------|-------------|
| Thermal correction to Enthalpy=              | 0.194042    |
| Thermal correction to Gibbs Free Energy=     | 0.137161    |
| Sum of electronic and zero-point Energies=   | -711.372461 |
| Sum of electronic and thermal Energies=      | -711.358119 |
| Sum of electronic and thermal Enthalpies=    | -711.357175 |
| Sum of electronic and thermal Free Energies= | -711.414056 |

|   |             |             |             |
|---|-------------|-------------|-------------|
| C | -1.12318100 | 0.28900300  | 0.00505700  |
| C | 0.11668600  | -0.37608900 | 0.00990700  |
| C | 1.34747700  | 0.30625200  | 0.01662200  |
| C | 1.26972500  | 1.71248700  | 0.01525700  |
| C | 0.04801000  | 2.40197600  | 0.00801900  |
| C | -1.15598500 | 1.69623400  | 0.00453800  |
| H | 0.09494400  | -1.47176200 | 0.01175200  |
| H | 2.20797900  | 2.27887100  | 0.02182800  |
| H | 0.03399700  | 3.49777600  | 0.00813500  |
| H | -2.11338700 | 2.22148500  | 0.00165700  |
| C | -2.36796700 | -0.52832200 | -0.00108700 |
| O | -3.48873800 | 0.22064500  | 0.00299200  |
| O | -2.40297600 | -1.74362400 | -0.00958900 |
| C | -4.73144900 | -0.48019800 | -0.00423900 |
| H | -4.82220900 | -1.12739800 | 0.88438000  |
| H | -5.51535100 | 0.29082600  | 0.00691000  |
| H | -4.82486500 | -1.10377000 | -0.90943400 |
| B | 2.80252200  | -0.48624600 | 0.01957400  |
| O | 2.87566000  | -1.23149800 | 1.28715400  |
| H | 3.74221000  | -1.67222500 | 1.28077800  |
| O | 3.94538000  | 0.44478000  | -0.04951000 |
| H | 4.02356700  | 0.73869000  | -0.97008000 |
| O | 2.90325600  | -1.37368800 | -1.17112400 |
| H | 2.07996500  | -1.88224300 | -1.23763000 |

**Int-1**

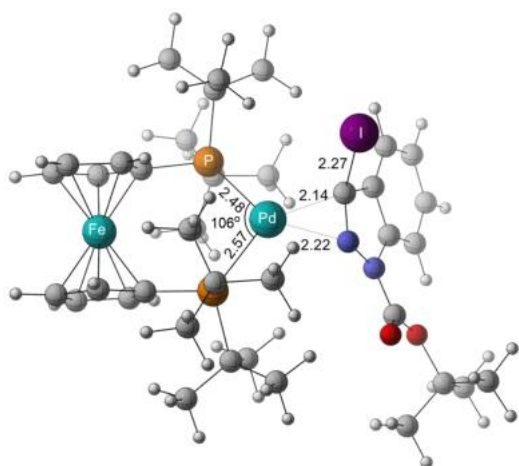

E(RB3LYP) = -4112.83489473

Zero-point correction= 0.874869 (Hartree/Particle)

Thermal correction to Energy= 0.929321

Thermal correction to Enthalpy= 0.930265

Thermal correction to Gibbs Free Energy= 0.788740

Sum of electronic and zero-point Energies= -4111.960025

Sum of electronic and thermal Energies= -4111.905574

Sum of electronic and thermal Enthalpies= -4111.904630

Sum of electronic and thermal Free Energies= -4112.046155

|    |            |             |             |
|----|------------|-------------|-------------|
| C  | 4.08613200 | -0.53239800 | 0.65936400  |
| C  | 5.43736700 | -0.12944600 | 0.44760800  |
| C  | 5.69220700 | -0.18364100 | -0.95429700 |
| C  | 4.50308500 | -0.63343500 | -1.60336400 |
| C  | 3.48454400 | -0.86416900 | -0.61010200 |
| H  | 3.58661300 | -0.56038200 | 1.62306400  |
| H  | 6.13500500 | 0.19823300  | 1.21896700  |
| H  | 6.62133000 | 0.09477300  | -1.45306400 |
| H  | 4.40348400 | -0.75699500 | -2.67892500 |
| Fe | 4.11555000 | 1.11997100  | -0.55719000 |
| C  | 4.16902100 | 2.80316100  | -1.78149600 |
| C  | 4.77604900 | 3.09497700  | -0.52530500 |
| C  | 2.82733600 | 2.39330200  | -1.53011600 |
| H  | 4.65029700 | 2.84969200  | -2.75886700 |
| C  | 3.80283100 | 2.87943700  | 0.49685600  |
| H  | 5.80932200 | 3.40379600  | -0.36271200 |
| C  | 2.57160300 | 2.44137600  | -0.11012400 |
| H  | 2.11946100 | 2.08596100  | -2.29377200 |
| H  | 3.99643300 | 3.00891100  | 1.55854600  |
| P  | 0.89554300 | 2.08703700  | 0.59499800  |
| P  | 1.79290000 | -1.60762500 | -0.72244000 |

|    |             |             |             |
|----|-------------|-------------|-------------|
| Pd | -0.05333000 | -0.27584400 | 0.25116600  |
| C  | -0.09714100 | 3.59032200  | -0.16707100 |
| C  | -1.30926100 | 3.98296300  | 0.69579500  |
| H  | -1.91102100 | 4.72165400  | 0.13211700  |
| H  | -1.97074900 | 3.13320200  | 0.91967900  |
| H  | -1.01458600 | 4.46674200  | 1.64016900  |
| C  | 0.77309100  | 4.84399600  | -0.38310000 |
| H  | 1.21829800  | 5.21084000  | 0.55607600  |
| H  | 1.58818400  | 4.67371000  | -1.10347100 |
| H  | 0.13585700  | 5.65433600  | -0.78714700 |
| C  | -0.63471800 | 3.10003500  | -1.52911300 |
| H  | -1.23527800 | 3.90370200  | -1.99668500 |
| H  | 0.17037000  | 2.84362800  | -2.23619700 |
| H  | -1.28078400 | 2.21262500  | -1.41236000 |
| C  | 1.05904600  | 2.33203800  | 2.50820400  |
| C  | 1.48682200  | 3.74308800  | 2.95599000  |
| H  | 0.71783700  | 4.50035400  | 2.73692200  |
| H  | 1.63691700  | 3.74178600  | 4.05283800  |
| H  | 2.42927400  | 4.07730200  | 2.49547000  |
| C  | 2.07526800  | 1.29150600  | 3.02645500  |
| H  | 1.77357700  | 0.26896900  | 2.73989000  |
| H  | 3.09935600  | 1.46358500  | 2.66559300  |
| H  | 2.09890200  | 1.33690500  | 4.13163100  |
| C  | -0.29147700 | 1.97756500  | 3.16958600  |
| H  | -0.16116700 | 1.99950900  | 4.26830400  |
| H  | -1.09613600 | 2.68255200  | 2.91944000  |
| H  | -0.62588100 | 0.96649900  | 2.88372900  |
| C  | 1.41637300  | -1.80019300 | -2.61615600 |
| C  | 1.48696900  | -0.40033000 | -3.26000400 |
| H  | 0.82276200  | 0.30809500  | -2.73631000 |
| H  | 2.50194700  | 0.02108700  | -3.27623700 |
| H  | 1.13826700  | -0.47388400 | -4.30741800 |
| C  | -0.04106900 | -2.27615200 | -2.78084500 |
| H  | -0.74798400 | -1.57269900 | -2.31231800 |
| H  | -0.27585900 | -2.33153900 | -3.86087400 |
| H  | -0.22477100 | -3.27114200 | -2.35253800 |
| C  | 2.33720800  | -2.76707600 | -3.38531300 |
| H  | 3.40839600  | -2.54786300 | -3.25775500 |
| H  | 2.16712100  | -3.81669100 | -3.09722000 |
| H  | 2.10988100  | -2.68936100 | -4.46578600 |
| C  | 2.19230700  | -3.36126900 | 0.03586900  |
| C  | 3.53424100  | -3.95747700 | -0.43135500 |
| H  | 4.38413800  | -3.29556300 | -0.19834000 |

|             |             |             |             |
|-------------|-------------|-------------|-------------|
| H           | 3.70148100  | -4.91192900 | 0.10448300  |
| H           | 3.55602800  | -4.17985300 | -1.50826300 |
| C           | 1.05531300  | -4.34889500 | -0.27865000 |
| H           | 1.02768000  | -4.63805000 | -1.34130700 |
| H           | 1.21097100  | -5.27512900 | 0.30598700  |
| H           | 0.07136800  | -3.94122200 | 0.00234700  |
| C           | 2.26077900  | -3.18413000 | 1.56835800  |
| H           | 2.32538600  | -4.18281600 | 2.04078400  |
| H           | 3.15397300  | -2.62246700 | 1.88160100  |
| H           | 1.36699600  | -2.68012200 | 1.96963500  |
| C           | -3.43157700 | -1.10109100 | -0.90289500 |
| C           | -2.62171400 | -2.11266900 | -0.34101900 |
| C           | -2.72913100 | -3.43238400 | -0.79236700 |
| C           | -3.61539500 | -3.71932100 | -1.83246900 |
| C           | -4.38176200 | -2.69579500 | -2.41748700 |
| C           | -4.30567000 | -1.37531800 | -1.96410100 |
| C           | -1.80237000 | -1.44097200 | 0.67419300  |
| H           | -2.13805900 | -4.22637900 | -0.33014000 |
| H           | -3.71279300 | -4.74628900 | -2.19660100 |
| H           | -5.06355000 | -2.93464400 | -3.23956700 |
| H           | -4.91412900 | -0.59286600 | -2.41195300 |
| N           | -2.20134400 | -0.15606200 | 0.80606000  |
| N           | -3.16880700 | 0.07971200  | -0.18068600 |
| C           | -3.98687200 | 1.20359800  | -0.02409300 |
| O           | -4.84303000 | 1.29489000  | -1.04349100 |
| O           | -3.88982600 | 1.97010300  | 0.90850400  |
| C           | -5.87751600 | 2.34777300  | -1.12141100 |
| C           | -6.61934200 | 1.99997000  | -2.41405900 |
| H           | -7.07463100 | 0.99696200  | -2.34698700 |
| H           | -7.42210100 | 2.73453700  | -2.59594600 |
| H           | -5.93018800 | 2.01608700  | -3.27584800 |
| C           | -6.81576100 | 2.24883000  | 0.08542000  |
| H           | -6.29438300 | 2.49363100  | 1.02284900  |
| H           | -7.65404200 | 2.95517400  | -0.04473300 |
| H           | -7.23495800 | 1.23046600  | 0.16510800  |
| C           | -5.20759200 | 3.72064600  | -1.23314300 |
| H           | -4.49874400 | 3.73525000  | -2.07966300 |
| H           | -5.97713900 | 4.49059000  | -1.41656300 |
| H           | -4.66473300 | 3.97888800  | -0.31169900 |
| I           | -1.56589500 | -2.55641100 | 2.63309000  |
| <b>TS-1</b> |             |             |             |

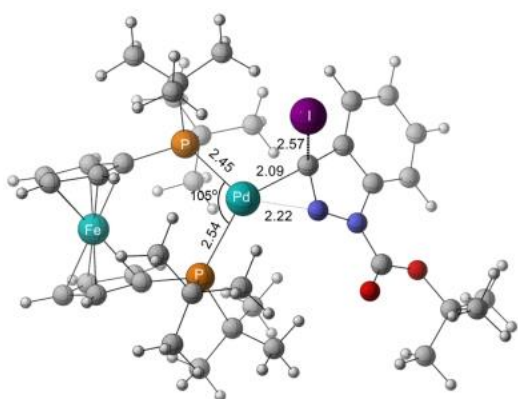

E(RB3LYP) = -4112.83362087

Zero-point correction= .875525 (Hartree/Particle)

Thermal correction to Energy= 0.929136

Thermal correction to Enthalpy= 0.930080

Thermal correction to Gibbs Free Energy= 0.791421

Sum of electronic and zero-point Energies= -4111.958096

Sum of electronic and thermal Energies= -4111.904485

Sum of electronic and thermal Enthalpies= -4111.903541

Sum of electronic and thermal Free Energies= -4112.042200

|   |             |             |             |
|---|-------------|-------------|-------------|
| C | -4.08986200 | -0.51520100 | -0.90308100 |
| C | -5.46425400 | -0.15756900 | -0.78129800 |
| C | -5.82428000 | -0.27227000 | 0.59329000  |
| C | -4.67621800 | -0.71216100 | 1.31708600  |
| C | -3.57688900 | -0.87545600 | 0.39761400  |
| H | -3.52015600 | -0.49709600 | -1.82723400 |
| H | -6.11020500 | 0.17994800  | -1.59228400 |
| H | -6.79668400 | -0.03848000 | 1.02811100  |
| H | -4.65694500 | -0.87399400 | 2.39185300  |
| F | -4.25680600 | 1.08595600  | 0.36855100  |
| C | -4.45758200 | 2.73096000  | 1.63324000  |
| C | -4.95020800 | 3.05303800  | 0.33553600  |
| C | -3.09242900 | 2.34694000  | 1.49733900  |
| H | -5.02759900 | 2.74176500  | 2.56266400  |
| C | -3.88475900 | 2.88122600  | -0.59811800 |
| H | -5.96850800 | 3.35334800  | 0.08644400  |
| C | -2.70881600 | 2.43698600  | 0.10785000  |
| H | -2.45474200 | 2.03024200  | 2.31653400  |
| H | -3.98266400 | 3.04210400  | -1.66830900 |
| P | -0.98379200 | 2.09902500  | -0.46602000 |
| P | -1.88778900 | -1.59080700 | 0.62634300  |
| P | -0.01406300 | -0.22284600 | -0.15761800 |
| C | -0.02289800 | 3.51332300  | 0.47501100  |

|   |             |             |             |
|---|-------------|-------------|-------------|
| C | 1.27133700  | 3.91419400  | -0.25327600 |
| H | 1.84809600  | 4.58691500  | 0.40980700  |
| H | 1.91692400  | 3.05540600  | -0.48855100 |
| H | 1.07653500  | 4.47313700  | -1.18223600 |
| C | -0.87806300 | 4.77804900  | 0.68742300  |
| H | -1.22936800 | 5.21043800  | -0.26350200 |
| H | -1.75701200 | 4.59258000  | 1.32399700  |
| H | -0.25802600 | 5.54408800  | 1.19136900  |
| C | 0.38014300  | 2.92923100  | 1.84652100  |
| H | 0.95189700  | 3.69023100  | 2.41080700  |
| H | -0.48824600 | 2.65323200  | 2.46524300  |
| H | 1.01795900  | 2.03533400  | 1.73282500  |
| C | -0.97190400 | 2.44288100  | -2.36961100 |
| C | -1.35073200 | 3.88466600  | -2.76071500 |
| H | -0.59084300 | 4.61429900  | -2.43929800 |
| H | -1.41745700 | 3.95055300  | -3.86348200 |
| H | -2.32120500 | 4.20573600  | -2.35193400 |
| C | -1.94392200 | 1.44280800  | -3.03317000 |
| H | -1.66992600 | 0.40329100  | -2.78311000 |
| H | -2.99588600 | 1.59968000  | -2.75691700 |
| H | -1.86862900 | 1.55301100  | -4.13111500 |
| C | 0.42585100  | 2.11451500  | -2.93999100 |
| H | 0.38555100  | 2.22373400  | -4.04016400 |
| H | 1.21781100  | 2.77937700  | -2.57087000 |
| H | 0.72322200  | 1.07783200  | -2.71154000 |
| C | -1.65651000 | -1.83754900 | 2.53591000  |
| C | -1.82248000 | -0.46586200 | 3.22018200  |
| H | -1.13306000 | 0.27669500  | 2.78491800  |
| H | -2.84569200 | -0.06955200 | 3.16193000  |
| H | -1.56538200 | -0.57243100 | 4.29068200  |
| C | -0.20691300 | -2.28327600 | 2.81054400  |
| H | 0.51963500  | -1.54405100 | 2.43809100  |
| H | -0.06934400 | -2.37834500 | 3.90417500  |
| H | 0.04016500  | -3.25539200 | 2.36284600  |
| C | -2.61303300 | -2.85836700 | 3.18317300  |
| H | -3.67492700 | -2.66514300 | 2.96810100  |
| H | -2.38436900 | -3.89093800 | 2.87545400  |
| H | -2.48419800 | -2.81343200 | 4.28126400  |
| C | -2.16211500 | -3.31515800 | -0.23387200 |
| C | -3.52206700 | -3.96020600 | 0.09896100  |
| H | -4.36851200 | -3.30867200 | -0.17204900 |
| H | -3.61902500 | -4.89156800 | -0.49138100 |
| H | -3.62241400 | -4.23438000 | 1.15925200  |



|              |             |             |             |
|--------------|-------------|-------------|-------------|
| C            | -1.02941000 | -4.28702900 | 0.14040300  |
| H            | -1.08075200 | -4.60992200 | 1.19244800  |
| H            | -1.11995400 | -5.19622800 | -0.48290900 |
| H            | -0.03659600 | -3.85267400 | -0.05597500 |
| C            | -2.11195300 | -3.07231000 | -1.75815900 |
| H            | -2.09611900 | -4.05154300 | -2.27272700 |
| H            | -3.00056000 | -2.53341800 | -2.12050600 |
| H            | -1.20833900 | -2.52163300 | -2.06402100 |
| C            | 3.54703000  | -0.97681800 | 1.05348700  |
| C            | 2.62726300  | -1.98086200 | 0.67164900  |
| C            | 2.70785000  | -3.25980300 | 1.23622300  |
| C            | 3.68762200  | -3.51128600 | 2.19594400  |
| C            | 4.57776600  | -2.49428400 | 2.59079200  |
| C            | 4.52643400  | -1.21688700 | 2.02877700  |
| C            | 1.74578500  | -1.34692700 | -0.31045200 |
| H            | 2.02511600  | -4.04973800 | 0.91654600  |
| H            | 3.76689300  | -4.50508900 | 2.64613100  |
| H            | 5.33504600  | -2.70732100 | 3.35161200  |
| H            | 5.22553000  | -0.44093400 | 2.33270700  |
| N            | 2.16706000  | -0.11417300 | -0.55667400 |
| N            | 3.25120700  | 0.16227500  | 0.27885800  |
| C            | 4.07169300  | 1.25135100  | -0.04023200 |
| O            | 5.06001600  | 1.35603000  | 0.84786700  |
| O            | 3.86597700  | 1.97973900  | -0.98516900 |
| C            | 6.12413300  | 2.37806600  | 0.73838100  |
| C            | 7.02324200  | 2.06000300  | 1.93507100  |
| H            | 7.43552400  | 1.03951700  | 1.85525700  |
| H            | 7.86445700  | 2.77267000  | 1.97257600  |
| H            | 6.45800700  | 2.13803200  | 2.87969600  |
| C            | 6.88607300  | 2.19588700  | -0.57768800 |
| H            | 6.24749800  | 2.41402600  | -1.44675000 |
| H            | 7.75082700  | 2.88169800  | -0.59677600 |
| H            | 7.26583700  | 1.16272800  | -0.66357400 |
| C            | 5.51284900  | 3.77566800  | 0.87466400  |
| H            | 4.92341900  | 3.84928500  | 1.80539400  |
| H            | 6.32150400  | 4.52575700  | 0.92077500  |
| H            | 4.86123400  | 4.01487300  | 0.02106800  |
| I            | 1.78716500  | -2.75816400 | -2.46357400 |
| <b>Int-2</b> |             |             |             |

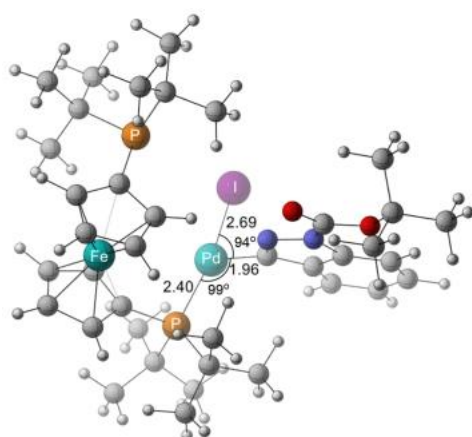

E(RB3LYP) = -4112.87675896

Zero-point correction= 0.874965 (Hartree/Particle)

Thermal correction to Energy= 0.929964

Thermal correction to Enthalpy= 0.930908

Thermal correction to Gibbs Free Energy= 0.785585

Sum of electronic and zero-point Energies= -4112.001794

Sum of electronic and thermal Energies= -4111.946795

Sum of electronic and thermal Enthalpies= -4111.945851

Sum of electronic and thermal Free Energies= -4112.091174

|   |             |             |             |
|---|-------------|-------------|-------------|
| C | 3.00177200  | -1.57731600 | -0.60714200 |
| C | 4.19757000  | -1.35397800 | -1.35072300 |
| C | 3.89414000  | -1.52028400 | -2.73359900 |
| C | 2.51402300  | -1.85634900 | -2.84816900 |
| C | 1.94015500  | -1.91938100 | -1.52590400 |
| H | 2.91279500  | -1.50473600 | 0.47678700  |
| H | 5.16743800  | -1.08286900 | -0.93637300 |
| H | 4.58599300  | -1.38532800 | -3.56564700 |
| H | 1.99727200  | -2.03528400 | -3.78866000 |
| F | 2.71901800  | -0.00129100 | -1.92648000 |
| C | 1.59923300  | 1.37728800  | -3.00236700 |
| C | 2.99156900  | 1.61404300  | -3.20060600 |
| C | 1.32736900  | 1.50533100  | -1.60589700 |
| H | 0.87686900  | 1.12346700  | -3.77728300 |
| C | 3.57321100  | 1.90468100  | -1.92951300 |
| H | 3.52696400  | 1.55772100  | -4.14942200 |
| C | 2.54503200  | 1.86867900  | -0.92371700 |
| H | 0.35642100  | 1.34956600  | -1.13331900 |
| H | 4.62829300  | 2.11863600  | -1.76668800 |
| P | 2.49250600  | 2.36735700  | 0.85936700  |
| P | 0.35163200  | -2.64565200 | -0.95300000 |
| P | -0.15613800 | -1.61880600 | 1.15857300  |

|   |             |             |             |
|---|-------------|-------------|-------------|
| C | 1.79910500  | 4.17633600  | 0.67176400  |
| C | 2.00789700  | 4.95710700  | 1.98382100  |
| H | 1.43654600  | 5.90405900  | 1.93607800  |
| H | 1.64069100  | 4.39517000  | 2.86124900  |
| H | 3.06253500  | 5.22413000  | 2.15897400  |
| C | 2.37163400  | 4.97688200  | -0.51080100 |
| H | 3.45675200  | 5.14489400  | -0.42423900 |
| H | 2.18040300  | 4.47344900  | -1.47334200 |
| H | 1.88454100  | 5.97130000  | -0.55352200 |
| C | 0.27666000  | 4.01681300  | 0.46899300  |
| H | -0.19374400 | 5.01892400  | 0.43482800  |
| H | 0.02210600  | 3.50557100  | -0.47258300 |
| H | -0.18854000 | 3.45393300  | 1.29748400  |
| C | 4.31778500  | 2.44596500  | 1.48548000  |
| C | 5.22100400  | 3.55017800  | 0.90767800  |
| H | 4.88331900  | 4.55913800  | 1.19417400  |
| H | 6.24900000  | 3.42790500  | 1.30224500  |
| H | 5.28451700  | 3.51377700  | -0.19224500 |
| C | 4.95551600  | 1.07262100  | 1.19653800  |
| H | 4.32705300  | 0.24297500  | 1.56644600  |
| H | 5.13425900  | 0.91314400  | 0.12343900  |
| H | 5.93143300  | 1.00748500  | 1.71483100  |
| C | 4.24953000  | 2.59375000  | 3.02354700  |
| H | 5.27125600  | 2.52226000  | 3.44364000  |
| H | 3.82929900  | 3.55907200  | 3.34454300  |
| H | 3.64138600  | 1.79138700  | 3.47730800  |
| C | -0.89500200 | -2.64813600 | -2.42067700 |
| C | -0.93889100 | -1.22110000 | -3.00404100 |
| H | -1.14449900 | -0.46254600 | -2.23244800 |
| H | -0.00170700 | -0.95389700 | -3.51254200 |
| H | -1.75193200 | -1.17656900 | -3.75277800 |
| C | -2.30297700 | -2.99967400 | -1.89491500 |
| H | -2.65683900 | -2.27867500 | -1.14484100 |
| H | -3.00719100 | -2.97130400 | -2.74695800 |
| H | -2.36012400 | -4.00676900 | -1.45610600 |
| C | -0.53759200 | -3.63959800 | -3.54718100 |
| H | 0.48048200  | -3.50383400 | -3.94277500 |
| H | -0.65143300 | -4.68954200 | -3.23580000 |
| H | -1.24036400 | -3.47288000 | -4.38472900 |
| C | 0.88508400  | -4.46292800 | -0.50893600 |
| C | 1.81440200  | -5.08500900 | -1.56882500 |
| H | 2.74319200  | -4.50372900 | -1.68986300 |
| H | 2.09866900  | -6.10003500 | -1.23220800 |

|              |             |             |             |
|--------------|-------------|-------------|-------------|
| H            | 1.34078700  | -5.18849500 | -2.55541300 |
| C            | -0.35944900 | -5.34603500 | -0.29817800 |
| H            | -0.89171000 | -5.56440200 | -1.23718300 |
| H            | -0.03825300 | -6.31549400 | 0.12596000  |
| H            | -1.07104700 | -4.89226700 | 0.41422500  |
| C            | 1.66059800  | -4.41613400 | 0.82531200  |
| H            | 1.99698800  | -5.43990400 | 1.07370600  |
| H            | 2.55944000  | -3.78146300 | 0.77283600  |
| H            | 1.03087500  | -4.07394400 | 1.66684600  |
| C            | -3.96242700 | -0.01096800 | 0.50828300  |
| C            | -3.14285100 | -1.02073900 | 1.06946200  |
| C            | -3.70532400 | -2.05548900 | 1.83364700  |
| C            | -5.08363100 | -2.06297600 | 2.02550700  |
| C            | -5.89148800 | -1.04945100 | 1.46471000  |
| C            | -5.35382000 | -0.01279700 | 0.70271400  |
| C            | -1.79548400 | -0.68112300 | 0.65113600  |
| H            | -3.06648100 | -2.83073900 | 2.26481200  |
| H            | -5.54891700 | -2.85658400 | 2.61726200  |
| H            | -6.97278800 | -1.07488700 | 1.63181800  |
| H            | -5.98828600 | 0.76240200  | 0.27814700  |
| N            | -1.78863200 | 0.40328800  | -0.06814900 |
| N            | -3.09579500 | 0.84223800  | -0.18158900 |
| C            | -3.34337300 | 1.98592200  | -0.96182600 |
| O            | -4.64590900 | 2.25424700  | -0.97027300 |
| O            | -2.46621300 | 2.59719700  | -1.52461400 |
| C            | -5.21956300 | 3.39339300  | -1.72319500 |
| C            | -6.71651900 | 3.27105600  | -1.43236400 |
| H            | -6.91202500 | 3.34998400  | -0.34919600 |
| H            | -7.26544100 | 4.07906900  | -1.94492500 |
| H            | -7.10701200 | 2.30313100  | -1.79075400 |
| C            | -4.66225200 | 4.70832900  | -1.17098300 |
| H            | -3.58317100 | 4.80138200  | -1.36491900 |
| H            | -5.17990400 | 5.55530000  | -1.65382600 |
| H            | -4.83714600 | 4.77442100  | -0.08291100 |
| C            | -4.93831200 | 3.21656500  | -3.21818200 |
| H            | -5.30476800 | 2.23488800  | -3.56623800 |
| H            | -5.46948400 | 4.00105200  | -3.78461700 |
| H            | -3.86294200 | 3.29425900  | -3.43782500 |
| I            | -0.24705700 | -0.73240900 | 3.69953400  |
| <b>Int-3</b> |             |             |             |

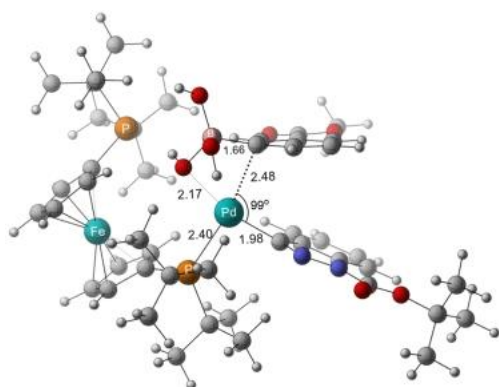

E(RB3LYP) = -4526.46989970

Zero-point correction= 1.056604 (Hartree/Particle)

Thermal correction to Energy= 1.124397

Thermal correction to Enthalpy= 1.125341

Thermal correction to Gibbs Free Energy= 0.954410

Sum of electronic and zero-point Energies= -4525.413295

Sum of electronic and thermal Energies= -4525.345503

Sum of electronic and thermal Enthalpies= -4525.344559

Sum of electronic and thermal Free Energies= -4525.515489

|   |             |             |             |
|---|-------------|-------------|-------------|
| C | -4.26765000 | -1.33797600 | 0.88055500  |
| C | -4.88021500 | -2.58571800 | 0.56236100  |
| C | -5.61421000 | -2.41054400 | -0.64944300 |
| C | -5.46366900 | -1.05309500 | -1.06651900 |
| C | -4.64286300 | -0.35947500 | -0.11085200 |
| H | -3.60365700 | -1.15077900 | 1.72183400  |
| H | -4.78232500 | -3.51384300 | 1.12595300  |
| H | -6.16825500 | -3.18333700 | -1.18380300 |
| H | -5.90330700 | -0.62851400 | -1.96794000 |
| F | -3.60935600 | -2.00226500 | -0.97046400 |
| C | -2.84827400 | -1.98432700 | -2.90802000 |
| C | -3.16219800 | -3.31712400 | -2.50329900 |
| C | -1.87026300 | -1.47197900 | -2.00669600 |
| H | -3.29379200 | -1.44817600 | -3.74557400 |
| C | -2.38296600 | -3.62593500 | -1.34953900 |
| H | -3.89818500 | -3.97391700 | -2.96810800 |
| C | -1.54501200 | -2.49180800 | -1.04266700 |
| H | -1.41400300 | -0.48327100 | -2.04260800 |
| H | -2.40925800 | -4.57314200 | -0.81369400 |
| P | 0.02932000  | -2.43897600 | -0.10178400 |
| P | -4.21635300 | 1.41684300  | 0.15763400  |
| P | 0.42234300  | -0.20066000 | 0.66856200  |
| C | 1.22389300  | -3.26427400 | -1.40043500 |

|   |             |             |             |
|---|-------------|-------------|-------------|
| C | 2.57826500  | -3.61842900 | -0.75364100 |
| H | 3.28097700  | -3.91062000 | -1.55629000 |
| H | 3.02064200  | -2.77177700 | -0.20752200 |
| H | 2.50110300  | -4.47719100 | -0.06765500 |
| C | 0.61942800  | -4.53544700 | -2.03677500 |
| H | 0.34246000  | -5.30927700 | -1.30807400 |
| H | -0.26185200 | -4.30962100 | -2.65615200 |
| H | 1.38713800  | -4.97303500 | -2.70214400 |
| C | 1.45213700  | -2.25772700 | -2.54432400 |
| H | 2.08040700  | -2.74271500 | -3.31460800 |
| H | 0.50803400  | -1.96065400 | -3.03040200 |
| H | 1.97294700  | -1.35182500 | -2.21029300 |
| C | -0.10104200 | -3.53844900 | 1.48141000  |
| C | -0.13052200 | -5.05738400 | 1.21848500  |
| H | 0.80504300  | -5.43802500 | 0.78199300  |
| H | -0.26382100 | -5.56670800 | 2.19101800  |
| H | -0.97047400 | -5.36497300 | 0.57600800  |
| C | -1.39442200 | -3.15206800 | 2.22513400  |
| H | -1.43417700 | -2.07989200 | 2.46806400  |
| H | -2.29082100 | -3.40438200 | 1.63714200  |
| H | -1.43543000 | -3.72647700 | 3.16968200  |
| C | 1.10987300  | -3.22006300 | 2.38495500  |
| H | 0.99908400  | -3.77493300 | 3.33481100  |
| H | 2.06930100  | -3.51591600 | 1.93435500  |
| H | 1.17511300  | -2.14500500 | 2.62158900  |
| C | -4.44571000 | 2.34880700  | -1.51357300 |
| C | -3.59678300 | 1.60993100  | -2.56591700 |
| H | -2.55008200 | 1.49925800  | -2.23347400 |
| H | -3.99142800 | 0.60998100  | -2.79902700 |
| H | -3.58673000 | 2.19963300  | -3.50237700 |
| C | -3.81990500 | 3.75243700  | -1.33889100 |
| H | -2.75731400 | 3.69228600  | -1.04601800 |
| H | -3.86775700 | 4.28966800  | -2.30573400 |
| H | -4.34803200 | 4.36954000  | -0.59607600 |
| C | -5.88545600 | 2.49597200  | -2.03727500 |
| H | -6.40350400 | 1.52811700  | -2.13846900 |
| H | -6.49874100 | 3.14535500  | -1.39189300 |
| H | -5.86220400 | 2.96543900  | -3.04008600 |
| C | -5.62986400 | 1.91955900  | 1.39253000  |
| C | -7.03663400 | 1.42016700  | 1.02027900  |
| H | -7.06436400 | 0.32276500  | 0.91149100  |
| H | -7.74565700 | 1.69144500  | 1.82718300  |
| H | -7.41564400 | 1.86533100  | 0.08764600  |

|   |             |             |             |
|---|-------------|-------------|-------------|
| C | -5.64077800 | 3.45096300  | 1.56327300  |
| H | -6.02406900 | 3.97427700  | 0.67228000  |
| H | -6.30481500 | 3.71747100  | 2.40766000  |
| H | -4.63538200 | 3.84583100  | 1.79501400  |
| C | -5.23603000 | 1.30037200  | 2.75148000  |
| H | -5.93651200 | 1.65746900  | 3.53077400  |
| H | -5.29646300 | 0.19956100  | 2.73787600  |
| H | -4.21322900 | 1.58765000  | 3.04632100  |
| C | 4.16375500  | 0.65177500  | -1.08028300 |
| C | 2.75075200  | 0.70767300  | -1.15118900 |
| C | 2.12032900  | 1.42576800  | -2.18096500 |
| C | 2.91322000  | 2.08093000  | -3.11826900 |
| C | 4.32180400  | 2.02347300  | -3.03246100 |
| C | 4.96967000  | 1.31474300  | -2.02178900 |
| C | 2.27393300  | -0.08842900 | -0.03036200 |
| H | 1.02950800  | 1.46961500  | -2.23652800 |
| H | 2.44586900  | 2.64593500  | -3.93018400 |
| H | 4.92485700  | 2.54806500  | -3.78007600 |
| H | 6.05569900  | 1.27686300  | -1.96741000 |
| N | 3.28680600  | -0.57399900 | 0.63855600  |
| N | 4.45350700  | -0.14377500 | 0.02976300  |
| C | 5.67776400  | -0.56302000 | 0.57878300  |
| O | 6.68803500  | -0.05734900 | -0.12527600 |
| O | 5.74883700  | -1.27928800 | 1.54884200  |
| C | 8.10387700  | -0.32793000 | 0.21011800  |
| C | 8.86203400  | 0.45155200  | -0.86618200 |
| H | 8.62211000  | 1.52732400  | -0.81180900 |
| H | 9.94903800  | 0.32971200  | -0.72267600 |
| H | 8.60039600  | 0.08344600  | -1.87309900 |
| C | 8.41691800  | 0.22300600  | 1.60435300  |
| H | 7.86612900  | -0.32238400 | 2.38525500  |
| H | 9.49826600  | 0.12352200  | 1.80257200  |
| H | 8.15445600  | 1.29382600  | 1.66339200  |
| C | 8.38345600  | -1.82926200 | 0.09448800  |
| H | 8.09879700  | -2.19848800 | -0.90638500 |
| H | 9.46327600  | -2.01177300 | 0.23293300  |
| H | 7.83139500  | -2.40079600 | 0.85551100  |
| C | 1.26732400  | 3.38971700  | 0.55590300  |
| C | 0.28238500  | 2.50752200  | 1.04805400  |
| C | 0.48162400  | 1.73558100  | 2.21520000  |
| C | 1.74748500  | 1.85206800  | 2.84565800  |
| C | 2.73428000  | 2.70832600  | 2.36344800  |
| C | 2.49424000  | 3.48759200  | 1.22153400  |

|   |             |             |             |
|---|-------------|-------------|-------------|
| H | -0.68881900 | 2.49935100  | 0.54416700  |
| H | 1.93179800  | 1.26507000  | 3.75133700  |
| H | 3.69733500  | 2.78635800  | 2.87744400  |
| H | 3.26040100  | 4.17042500  | 0.84906100  |
| C | 0.94844800  | 4.20406200  | -0.65154200 |
| O | 1.92966200  | 5.05831900  | -0.97881600 |
| O | -0.08752200 | 4.12039300  | -1.28207900 |
| C | 1.71305600  | 5.88871700  | -2.12163700 |
| H | 0.81722300  | 6.51608800  | -1.98218400 |
| H | 2.60938100  | 6.51853800  | -2.21139500 |
| H | 1.58602500  | 5.27488300  | -3.02876100 |
| B | -0.78760100 | 0.94753200  | 2.93223200  |
| O | -1.73104300 | 1.93192700  | 3.41777900  |
| H | -2.26333200 | 1.51166200  | 4.11291600  |
| O | -0.40717500 | 0.06247800  | 4.01545300  |
| H | 0.15947600  | -0.66008300 | 3.70819600  |
| O | -1.41550600 | 0.09893800  | 1.79206000  |
| H | -2.07867700 | 0.63293800  | 1.30169100  |

## TS-2

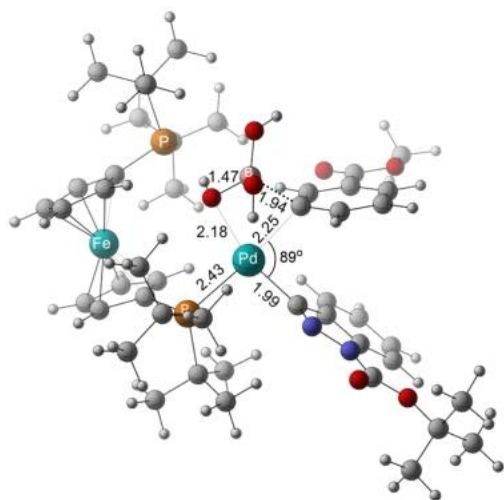

E(RB3LYP) = -4526.46245469

Zero-point correction= .054833 (Hartree/Particle)

Thermal correction to Energy= 1.122349

Thermal correction to Enthalpy= 1.123293

Thermal correction to Gibbs Free Energy= 0.953228

Sum of electronic and zero-point Energies= -4525.407621

Sum of electronic and thermal Energies= -4525.340106

Sum of electronic and thermal Enthalpies= -4525.339161

Sum of electronic and thermal Free Energies= -4525.509227

C 4.15810400 -1.56336400 -1.03699800



|   |             |             |             |
|---|-------------|-------------|-------------|
| C | 4.73057600  | -2.84155900 | -0.76782500 |
| C | 5.54936800  | -2.71270300 | 0.39397200  |
| C | 5.49175600  | -1.35368400 | 0.82862700  |
| C | 4.64320200  | -0.61321800 | -0.06570800 |
| H | 3.45335000  | -1.33703000 | -1.83398200 |
| H | 4.55393200  | -3.75826400 | -1.33077900 |
| H | 6.10044000  | -3.51552700 | 0.88536000  |
| H | 6.00936100  | -0.96019900 | 1.70216100  |
| F | 3.58992700  | -2.21168100 | 0.84841600  |
| C | 2.93965700  | -2.14514200 | 2.82447000  |
| C | 3.17407300  | -3.49340300 | 2.41787200  |
| C | 1.93392800  | -1.60045700 | 1.97310400  |
| H | 3.45311700  | -1.62162200 | 3.63038500  |
| C | 2.31674200  | -3.77856100 | 1.31434700  |
| H | 3.90683700  | -4.17687100 | 2.84817200  |
| C | 1.50979500  | -2.61425800 | 1.04194500  |
| H | 1.52365500  | -0.59207300 | 2.02257200  |
| H | 2.27351100  | -4.73111900 | 0.78931300  |
| P | -0.10732300 | -2.48670100 | 0.17350300  |
| P | 4.25756600  | 1.17956500  | -0.27251700 |
| P | -0.48538500 | -0.21570300 | -0.60687600 |
| C | -1.27145200 | -3.24971600 | 1.53097800  |
| C | -2.66165500 | -3.56695300 | 0.94400700  |
| H | -3.34381300 | -3.82124500 | 1.77701700  |
| H | -3.09399700 | -2.71555200 | 0.39776000  |
| H | -2.63906500 | -4.43854700 | 0.26988100  |
| C | -0.69724700 | -4.52741800 | 2.17821300  |
| H | -0.49431200 | -5.33174400 | 1.45657100  |
| H | 0.22571500  | -4.32808600 | 2.74400500  |
| H | -1.44762800 | -4.91186200 | 2.89472200  |
| C | -1.41805800 | -2.19519800 | 2.64582800  |
| H | -2.06077300 | -2.61161100 | 3.44423900  |
| H | -0.44728100 | -1.94191700 | 3.10399800  |
| H | -1.88581700 | -1.26873700 | 2.28583200  |
| C | -0.07875900 | -3.60380400 | -1.39901100 |
| C | -0.08473400 | -5.12148700 | -1.13281900 |
| H | -1.01604800 | -5.46912600 | -0.66001400 |
| H | -0.00136700 | -5.64207700 | -2.10534300 |
| H | 0.76547900  | -5.45211000 | -0.51579800 |
| C | 1.19177700  | -3.24949500 | -2.19601700 |
| H | 1.26073100  | -2.17101100 | -2.40843600 |
| H | 2.10488600  | -3.55268800 | -1.66115300 |
| H | 1.16529400  | -3.79156900 | -3.16007800 |

|   |             |             |             |
|---|-------------|-------------|-------------|
| C | -1.30941700 | -3.24660700 | -2.25994800 |
| H | -1.27681200 | -3.84235700 | -3.19113400 |
| H | -2.26393100 | -3.46017300 | -1.75603900 |
| H | -1.31346800 | -2.17924100 | -2.53672300 |
| C | 4.69818700  | 2.07810800  | 1.37382000  |
| C | 3.93026400  | 1.36140800  | 2.50166100  |
| H | 2.85028700  | 1.30229300  | 2.28103300  |
| H | 4.29977500  | 0.34145100  | 2.68177800  |
| H | 4.04629400  | 1.93647400  | 3.44000500  |
| C | 4.12612200  | 3.51185900  | 1.28446200  |
| H | 3.03869100  | 3.51164200  | 1.09528300  |
| H | 4.29275000  | 4.02409400  | 2.25160500  |
| H | 4.61005800  | 4.12069600  | 0.50595100  |
| C | 6.19119000  | 2.14908800  | 1.74150000  |
| H | 6.66975400  | 1.15664600  | 1.77410100  |
| H | 6.76240200  | 2.77989500  | 1.04134800  |
| H | 6.29776900  | 2.60186800  | 2.74652000  |
| C | 5.53380400  | 1.65804500  | -1.65524900 |
| C | 6.94721900  | 1.08351500  | -1.45749400 |
| H | 6.93339400  | -0.01770700 | -1.39202000 |
| H | 7.57759100  | 1.35633400  | -2.32666700 |
| H | 7.44469900  | 1.47274600  | -0.55576700 |
| C | 5.59790300  | 3.19186600  | -1.78798500 |
| H | 6.11045800  | 3.67159600  | -0.93846300 |
| H | 6.16700100  | 3.45281600  | -2.70062600 |
| H | 4.59134000  | 3.63620800  | -1.88675200 |
| C | 4.95648100  | 1.10259200  | -2.97648700 |
| H | 5.60019600  | 1.43098300  | -3.81550800 |
| H | 4.94320900  | 0.00029800  | -2.99176900 |
| H | 3.93195900  | 1.46809000  | -3.16233900 |
| C | -4.30541600 | 0.62778300  | 1.00256500  |
| C | -2.89564000 | 0.72006700  | 1.09766300  |
| C | -2.30374900 | 1.48313900  | 2.11787900  |
| C | -3.12975300 | 2.13865800  | 3.02690000  |
| C | -4.53397800 | 2.03826100  | 2.92028100  |
| C | -5.14495500 | 1.28821900  | 1.91564900  |
| C | -2.37276800 | -0.08718500 | 0.00455400  |
| H | -1.21539900 | 1.55585400  | 2.19135100  |
| H | -2.69190700 | 2.73819300  | 3.83046800  |
| H | -5.16428100 | 2.56266000  | 3.64543000  |
| H | -6.22854500 | 1.21923800  | 1.84433900  |
| N | -3.36109800 | -0.60399300 | -0.67971600 |
| N | -4.55390800 | -0.19151700 | -0.09996600 |

|       |              |             |             |
|-------|--------------|-------------|-------------|
| C     | -5.75407300  | -0.63891200 | -0.67206200 |
| O     | -6.79277200  | -0.14796500 | 0.00359500  |
| O     | -5.79134500  | -1.36403000 | -1.63844600 |
| C     | -8.19270600  | -0.44136600 | -0.37122800 |
| C     | -8.99425100  | 0.32962800  | 0.67969000  |
| H     | -8.77036300  | 1.40899300  | 0.62785100  |
| H     | -10.07464500 | 0.18936600  | 0.50602200  |
| H     | -8.75520600  | -0.03029100 | 1.69517200  |
| C     | -8.47467700  | 0.10011100  | -1.77601900 |
| H     | -7.89278400  | -0.43897000 | -2.53854300 |
| H     | -9.54815400  | -0.01693500 | -2.00515800 |
| H     | -8.22732200  | 1.17475800  | -1.83136200 |
| C     | -8.45424500  | -1.94637100 | -0.25845700 |
| H     | -8.19223300  | -2.30845100 | 0.75120000  |
| H     | -9.52710400  | -2.14493600 | -0.42618600 |
| H     | -7.87267100  | -2.51189500 | -1.00170600 |
| C     | -0.92109000  | 3.94864400  | -0.25231100 |
| C     | -0.24018600  | 2.75445800  | -0.53395800 |
| C     | -0.69092100  | 1.83695200  | -1.50765300 |
| C     | -1.88418400  | 2.17746100  | -2.18736300 |
| C     | -2.56727000  | 3.37132600  | -1.93850000 |
| C     | -2.09080600  | 4.25844300  | -0.96871600 |
| H     | 0.68721100   | 2.55834500  | 0.01298200  |
| H     | -2.27288800  | 1.49582700  | -2.95063100 |
| H     | -3.47669700  | 3.61393200  | -2.49716100 |
| H     | -2.62208600  | 5.18979200  | -0.76171400 |
| C     | -0.37857400  | 4.84492800  | 0.80830000  |
| O     | -1.09327700  | 5.97220800  | 0.95453700  |
| O     | 0.60194500   | 4.59849500  | 1.48270600  |
| C     | -0.65263500  | 6.89319200  | 1.95447700  |
| H     | 0.37229100   | 7.23906900  | 1.74054900  |
| H     | -1.35490300  | 7.73802100  | 1.91801100  |
| H     | -0.67222000  | 6.42347400  | 2.95196300  |
| B     | 0.69273400   | 1.04781700  | -2.60737700 |
| O     | 1.52794000   | 2.13222500  | -2.97494600 |
| H     | 1.11872700   | 2.62331300  | -3.70550100 |
| O     | 0.06182100   | 0.42188000  | -3.71738100 |
| H     | -0.56177000  | -0.26951300 | -3.44713000 |
| O     | 1.37889200   | 0.13530300  | -1.68443700 |
| H     | 2.09332000   | 0.60240700  | -1.18389100 |
| Int-4 |              |             |             |

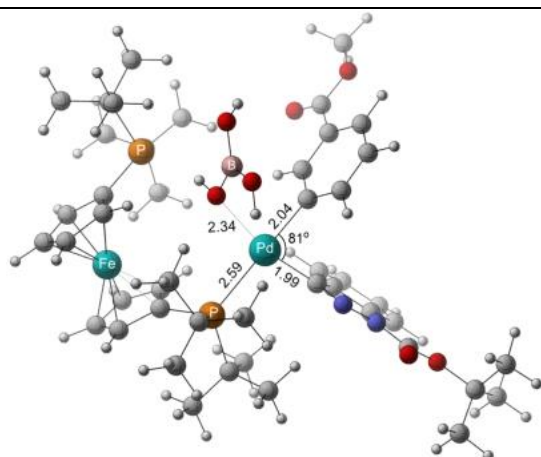

E(RB3LYP) = -4526.49721381

Zero-point correction= 1.055916 (Hartree/Particle)

Thermal correction to Energy= 1.124276

Thermal correction to Enthalpy= 1.125220

Thermal correction to Gibbs Free Energy= 0.951368

Sum of electronic and zero-point Energies= -4525.441298

Sum of electronic and thermal Energies= -4525.372938

Sum of electronic and thermal Enthalpies= -4525.371993

Sum of electronic and thermal Free Energies= -4525.545846

|   |             |             |             |
|---|-------------|-------------|-------------|
| C | -4.13487200 | -1.71899000 | 0.94086200  |
| C | -4.64647800 | -3.03959700 | 0.77609900  |
| C | -5.32900000 | -3.08442200 | -0.47729000 |
| C | -5.24680300 | -1.78993700 | -1.07472000 |
| C | -4.52317700 | -0.91534100 | -0.19184800 |
| H | -3.54525400 | -1.36503300 | 1.78362900  |
| H | -4.51710600 | -3.87220200 | 1.46794800  |
| H | -5.80299100 | -3.96133000 | -0.91996300 |
| H | -5.66712900 | -1.52451900 | -2.04379100 |
| F | -3.34211300 | -2.58193500 | -0.77196000 |
| C | -2.50690000 | -2.81091500 | -2.66083300 |
| C | -2.73733700 | -4.08353500 | -2.05483500 |
| C | -1.60326500 | -2.09010500 | -1.82568600 |
| H | -2.95786300 | -2.44978200 | -3.58515400 |
| C | -1.97792000 | -4.14295100 | -0.84795600 |
| H | -3.40564800 | -4.86113400 | -2.42649800 |
| C | -1.23833100 | -2.91497000 | -0.70349900 |
| H | -1.21886000 | -1.08710600 | -2.00692600 |
| H | -1.95551300 | -4.99225700 | -0.16685400 |
| P | 0.27530400  | -2.52098700 | 0.27176400  |
| P | -4.26196200 | 0.90760100  | -0.12613400 |
| P | 0.63680000  | 0.02350700  | 0.59617700  |

|   |             |             |             |
|---|-------------|-------------|-------------|
| C | 1.58906700  | -3.47509800 | -0.80425400 |
| C | 2.93379100  | -3.55142000 | -0.05323100 |
| H | 3.71036600  | -3.91414600 | -0.75343600 |
| H | 3.25739900  | -2.57095100 | 0.33063900  |
| H | 2.90205400  | -4.26509800 | 0.78629000  |
| C | 1.16284900  | -4.89570000 | -1.22540500 |
| H | 0.96077300  | -5.56310800 | -0.37551700 |
| H | 0.27412000  | -4.88599800 | -1.87563200 |
| H | 1.99050000  | -5.34648300 | -1.80605900 |
| C | 1.78338100  | -2.65425400 | -2.09549100 |
| H | 2.54041200  | -3.15686600 | -2.72718100 |
| H | 0.85396400  | -2.58906700 | -2.68594100 |
| H | 2.13738800  | -1.63372900 | -1.89246800 |
| C | 0.13851400  | -3.35527500 | 2.00850900  |
| C | 0.23644100  | -4.89206900 | 2.04465400  |
| H | 1.22195500  | -5.26419400 | 1.72543100  |
| H | 0.08599400  | -5.22882800 | 3.08808700  |
| H | -0.53681800 | -5.38201100 | 1.43135100  |
| C | -1.21789800 | -2.94818000 | 2.61529300  |
| H | -1.35302500 | -1.85584700 | 2.63876200  |
| H | -2.06090200 | -3.38211400 | 2.05612700  |
| H | -1.27064700 | -3.31937100 | 3.65621700  |
| C | 1.26251200  | -2.76766800 | 2.89057600  |
| H | 1.13735800  | -3.12752700 | 3.92894300  |
| H | 2.26766500  | -3.06391700 | 2.55327100  |
| H | 1.23797400  | -1.66336600 | 2.90240000  |
| C | -4.38083600 | 1.61179300  | -1.91285900 |
| C | -3.35575800 | 0.83608500  | -2.76227000 |
| H | -2.34672600 | 0.88202800  | -2.31603900 |
| H | -3.62918100 | -0.22252000 | -2.88558300 |
| H | -3.29649000 | 1.29472400  | -3.76756800 |
| C | -3.90926900 | 3.08262000  | -1.86174900 |
| H | -2.90748100 | 3.18448400  | -1.41118000 |
| H | -3.84806100 | 3.47608300  | -2.89448400 |
| H | -4.59989600 | 3.73476200  | -1.30575600 |
| C | -5.75859500 | 1.54817800  | -2.59579000 |
| H | -6.17377700 | 0.52761300  | -2.62766100 |
| H | -6.49639500 | 2.20284500  | -2.10453600 |
| H | -5.66103800 | 1.89831500  | -3.64176200 |
| C | -5.81469000 | 1.44031300  | 0.91139800  |
| C | -7.14105900 | 0.80024800  | 0.46506100  |
| H | -7.09200000 | -0.30136000 | 0.49208300  |
| H | -7.94663500 | 1.11366000  | 1.15770200  |

|   |             |             |             |
|---|-------------|-------------|-------------|
| H | -7.44369000 | 1.10401400  | -0.54857200 |
| C | -5.93773400 | 2.97623000  | 0.89687300  |
| H | -6.27307400 | 3.36431100  | -0.07864200 |
| H | -6.69022700 | 3.28708700  | 1.64646400  |
| H | -4.98402200 | 3.46770600  | 1.15993200  |
| C | -5.53114300 | 1.00428800  | 2.36596700  |
| H | -6.35245700 | 1.36488900  | 3.01487900  |
| H | -5.49363500 | -0.09291700 | 2.46918800  |
| H | -4.58461900 | 1.42456700  | 2.74479500  |
| C | 4.37754200  | 0.63104200  | -1.31498200 |
| C | 2.96472900  | 0.71240900  | -1.34343100 |
| C | 2.30830700  | 1.24486500  | -2.46449100 |
| C | 3.07390400  | 1.68721200  | -3.54065300 |
| C | 4.48220200  | 1.59946300  | -3.49975500 |
| C | 5.15672900  | 1.07414000  | -2.39704800 |
| C | 2.50439800  | 0.16273100  | -0.07611800 |
| H | 1.21648200  | 1.30429600  | -2.48340200 |
| H | 2.58548000  | 2.10709800  | -4.42506400 |
| H | 5.06524700  | 1.95301200  | -4.35612100 |
| H | 6.24303100  | 1.01269100  | -2.37906100 |
| N | 3.53520900  | -0.19453100 | 0.65010100  |
| N | 4.69352600  | 0.06753900  | -0.07760300 |
| C | 5.92525600  | -0.26162200 | 0.50144300  |
| O | 6.92139800  | 0.06344500  | -0.32462700 |
| O | 6.02583700  | -0.76783000 | 1.59508000  |
| C | 8.34030700  | -0.16679300 | 0.01662500  |
| C | 9.07661200  | 0.35931500  | -1.21740500 |
| H | 8.85853200  | 1.42945100  | -1.37586900 |
| H | 10.16546900 | 0.24170900  | -1.08434500 |
| H | 8.77384100  | -0.19812800 | -2.12046300 |
| C | 8.71258600  | 0.64790100  | 1.25932400  |
| H | 8.18139300  | 0.28447000  | 2.15165300  |
| H | 9.79879000  | 0.56718000  | 1.43890100  |
| H | 8.46847500  | 1.71402800  | 1.10778200  |
| C | 8.59200000  | -1.66666000 | 0.20055700  |
| H | 8.26461800  | -2.22444800 | -0.69440100 |
| H | 9.67311700  | -1.84294600 | 0.33761000  |
| H | 8.05850600  | -2.05870200 | 1.07932700  |
| C | 0.41691000  | 4.36387800  | 0.48652300  |
| C | 0.30634100  | 2.99262700  | 0.18296400  |
| C | 0.94910400  | 2.01179400  | 0.95486800  |
| C | 1.72736100  | 2.45316200  | 2.04228600  |
| C | 1.83667100  | 3.81435000  | 2.36262100  |



|   |             |             |             |
|---|-------------|-------------|-------------|
| C | 5.82887300  | 0.28521400  | 1.29615900  |
| C | 6.29767300  | -0.07264500 | -0.00134000 |
| C | 5.23903500  | -0.74176100 | -0.68534900 |
| C | 4.08683900  | -0.80670900 | 0.17940200  |
| H | 3.84407100  | 0.00052400  | 2.27354100  |
| H | 6.38736000  | 0.82935200  | 2.05837200  |
| H | 7.28139200  | 0.14842500  | -0.41703500 |
| H | 5.31255900  | -1.11225900 | -1.70416400 |
| F | 4.63292400  | 1.16999800  | -0.15990200 |
| C | 4.84210600  | 2.50645300  | -1.74157700 |
| C | 5.21592700  | 3.13760600  | -0.51918200 |
| C | 3.49064300  | 2.07288900  | -1.61121500 |
| H | 5.48304900  | 2.34819200  | -2.60941300 |
| C | 4.09103300  | 3.10423400  | 0.35845500  |
| H | 6.19658900  | 3.54961200  | -0.27838700 |
| C | 2.99599900  | 2.44413600  | -0.30689200 |
| H | 2.93326500  | 1.53445600  | -2.37190400 |
| H | 4.09506800  | 3.50089500  | 1.37045800  |
| P | 1.22480800  | 2.20203400  | 0.17095000  |
| P | 2.45556400  | -1.66534800 | -0.00524100 |
| P | 0.25348900  | -0.22998900 | 0.18617900  |
| C | 0.40942700  | 3.54550600  | -0.99084200 |
| C | -0.98172300 | 3.97032100  | -0.48137200 |
| H | -1.46603100 | 4.58994400  | -1.25976000 |
| H | -1.63615200 | 3.10960600  | -0.27898900 |
| H | -0.92539400 | 4.58557800  | 0.43042200  |
| C | 1.28239500  | 4.80421500  | -1.16574400 |
| H | 1.46737200  | 5.33234300  | -0.21808200 |
| H | 2.25601800  | 4.57494300  | -1.62732700 |
| H | 0.75413400  | 5.50745200  | -1.83815000 |
| C | 0.22888600  | 2.88613000  | -2.37386600 |
| H | -0.27699900 | 3.60148200  | -3.04993800 |
| H | 1.19035000  | 2.62521700  | -2.84300400 |
| H | -0.39038700 | 1.97816800  | -2.31759000 |
| C | 1.08414700  | 2.79286800  | 2.01297500  |
| C | 1.40256900  | 4.28153500  | 2.25451100  |
| H | 1.40492600  | 4.46899400  | 3.34535100  |
| H | 2.38483900  | 4.59032900  | 1.86616300  |
| H | 0.64037900  | 4.94522500  | 1.81710900  |
| C | 2.03062700  | 1.92030200  | 2.86243700  |
| H | 1.81806600  | 0.84761700  | 2.71367900  |
| H | 3.09429800  | 2.09843600  | 2.65088400  |
| H | 1.85981600  | 2.14927800  | 3.93115200  |



|   |             |             |             |
|---|-------------|-------------|-------------|
| C | -0.34143600 | 2.50453600  | 2.52609200  |
| H | -0.38593000 | 2.77529300  | 3.59845900  |
| H | -1.12017300 | 3.07669600  | 2.00473100  |
| H | -0.59922700 | 1.43943400  | 2.42446400  |
| C | 2.44645600  | -2.36136000 | -1.81629100 |
| C | 2.55938500  | -1.16095700 | -2.77951500 |
| H | 1.77607600  | -0.41230700 | -2.56812900 |
| H | 3.53652900  | -0.65983500 | -2.74118800 |
| H | 2.40832200  | -1.52026300 | -3.81479000 |
| C | 1.07587600  | -3.00656700 | -2.10127000 |
| H | 0.26569300  | -2.27330700 | -1.97915300 |
| H | 1.06319200  | -3.35811100 | -3.15020200 |
| H | 0.85300200  | -3.87000300 | -1.45958700 |
| C | 3.54438600  | -3.39437800 | -2.13794700 |
| H | 4.56046600  | -3.05087300 | -1.89348800 |
| H | 3.37522400  | -4.35091300 | -1.61856600 |
| H | 3.51970100  | -3.60869800 | -3.22347700 |
| C | 2.75016200  | -3.14533700 | 1.23915400  |
| C | 4.19941900  | -3.67087000 | 1.22705800  |
| H | 4.92635100  | -2.89432400 | 1.51359900  |
| H | 4.28116100  | -4.49012700 | 1.96719600  |
| H | 4.49984500  | -4.07982600 | 0.25098400  |
| C | 1.79051000  | -4.31828100 | 0.95874400  |
| H | 2.04006300  | -4.85232200 | 0.02822600  |
| H | 1.88142000  | -5.05014900 | 1.78361400  |
| H | 0.73810000  | -3.99841600 | 0.91084100  |
| C | 2.44616000  | -2.61114600 | 2.65480300  |
| H | 2.53773400  | -3.44351100 | 3.37825500  |
| H | 3.15618500  | -1.83195500 | 2.97141900  |
| H | 1.42504700  | -2.20921500 | 2.73191600  |
| C | -3.63294800 | 0.76445400  | -1.30872400 |
| C | -2.31723400 | 0.27291100  | -1.48947600 |
| C | -1.92003800 | -0.21195900 | -2.74672200 |
| C | -2.83515000 | -0.19727600 | -3.79691300 |
| C | -4.14097900 | 0.29926400  | -3.60009800 |
| C | -4.56171900 | 0.78704700  | -2.36265700 |
| C | -1.64889500 | 0.40819800  | -0.19670500 |
| H | -0.90532700 | -0.58902100 | -2.89531300 |
| H | -2.54310800 | -0.57255000 | -4.78227200 |
| H | -4.84528400 | 0.30314400  | -4.43806500 |
| H | -5.57143800 | 1.16767700  | -2.22188500 |
| N | -2.49030800 | 0.91308700  | 0.67126200  |
| N | -3.70233500 | 1.15207500  | 0.02914800  |

|             |             |             |             |
|-------------|-------------|-------------|-------------|
| C           | -4.74455600 | 1.71123700  | 0.77836900  |
| O           | -5.83218800 | 1.85367600  | 0.01788000  |
| O           | -4.63324100 | 2.00805000  | 1.94563500  |
| C           | -7.09587600 | 2.41301300  | 0.53921800  |
| C           | -8.01650500 | 2.37077300  | -0.68258000 |
| H           | -8.14063000 | 1.33507200  | -1.04283300 |
| H           | -9.01080800 | 2.76938800  | -0.41855600 |
| H           | -7.60367000 | 2.98104200  | -1.50423600 |
| C           | -7.63619700 | 1.51593300  | 1.65736600  |
| H           | -6.97581400 | 1.52935100  | 2.53730300  |
| H           | -8.63599200 | 1.87105500  | 1.96221900  |
| H           | -7.73563100 | 0.47540300  | 1.30154900  |
| C           | -6.87316500 | 3.85672700  | 1.00064600  |
| H           | -6.43421400 | 4.45794400  | 0.18508900  |
| H           | -7.84270000 | 4.30764800  | 1.27512700  |
| H           | -6.20578900 | 3.90071800  | 1.87418200  |
| C           | -1.05446800 | -1.88336300 | 2.26240800  |
| C           | -0.88013000 | -1.81633700 | 0.86373800  |
| C           | -1.55860300 | -2.77866000 | 0.10154100  |
| C           | -2.32891400 | -3.79778900 | 0.69547300  |
| C           | -2.45370300 | -3.86088300 | 2.09304400  |
| C           | -1.81812400 | -2.89044300 | 2.86942700  |
| H           | -0.59433400 | -1.12660900 | 2.90629300  |
| H           | -1.51993900 | -2.76580100 | -0.98823900 |
| H           | -3.04839300 | -4.64969700 | 2.55749600  |
| H           | -1.91883400 | -2.91140500 | 3.95978300  |
| C           | -2.99309800 | -4.78459700 | -0.20330100 |
| O           | -3.72163000 | -5.69581200 | 0.46746400  |
| O           | -2.90230400 | -4.78898800 | -1.41540500 |
| C           | -4.39357800 | -6.68513100 | -0.31218800 |
| H           | -5.11195500 | -6.21558700 | -1.00495200 |
| H           | -3.67128500 | -7.28027000 | -0.89581500 |
| H           | -4.92331300 | -7.32824800 | 0.40512400  |
| <b>TS-3</b> |             |             |             |

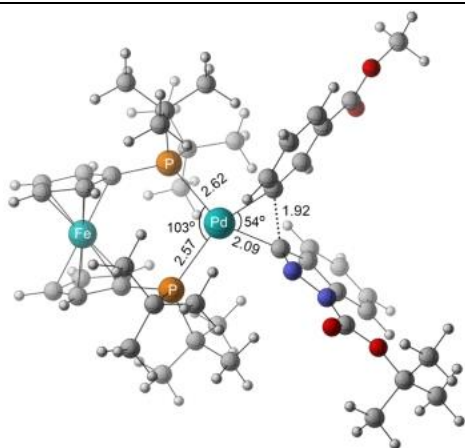

E(RB3LYP) = -4274.18602366

Zero-point correction= 1.007092 (Hartree/Particle)

Thermal correction to Energy= 1.068862

Thermal correction to Enthalpy= 1.069806

Thermal correction to Gibbs Free Energy= 0.913659

Sum of electronic and zero-point Energies= -4273.178932

Sum of electronic and thermal Energies= -4273.117162

Sum of electronic and thermal Enthalpies= -4273.116218

Sum of electronic and thermal Free Energies= -4273.272364

|   |            |             |             |
|---|------------|-------------|-------------|
| C | 4.37298600 | 0.36747500  | 1.42864300  |
| C | 5.65656200 | 0.97943600  | 1.33083700  |
| C | 6.20710300 | 0.63062500  | 0.06331400  |
| C | 5.26790600 | -0.20655400 | -0.61104500 |
| C | 4.10983200 | -0.38900700 | 0.22808300  |
| H | 3.69887300 | 0.47417000  | 2.27202700  |
| H | 6.11522500 | 1.62522100  | 2.08027000  |
| H | 7.16536200 | 0.96154900  | -0.33888300 |
| H | 5.42175000 | -0.61012600 | -1.60822900 |
| F | 4.39902400 | 1.63323500  | -0.19337700 |
| C | 4.42946700 | 2.87229200  | -1.86326000 |
| C | 4.74194300 | 3.62592500  | -0.69380100 |
| C | 3.13813500 | 2.29749100  | -1.67634200 |
| H | 5.07396900 | 2.72862700  | -2.73105900 |
| C | 3.63730400 | 3.52608800  | 0.20505800  |
| H | 5.67053200 | 4.16480500  | -0.50160300 |
| C | 2.61711400 | 2.70267400  | -0.39302000 |
| H | 2.63892900 | 1.64148200  | -2.38325000 |
| H | 3.60521000 | 3.99242400  | 1.18668200  |
| P | 0.89521500 | 2.26818000  | 0.13422500  |
| P | 2.58259700 | -1.42321100 | 0.02964500  |
| P | 0.26336100 | -0.21736100 | 0.17444300  |

|   |             |             |             |
|---|-------------|-------------|-------------|
| C | -0.10581300 | 3.40402800  | -1.09689500 |
| C | -1.54179800 | 3.62957200  | -0.58670000 |
| H | -2.13850700 | 4.09408900  | -1.39456600 |
| H | -2.03502800 | 2.68687000  | -0.30337800 |
| H | -1.57900800 | 4.31366500  | 0.27585800  |
| C | 0.55919500  | 4.76711200  | -1.36725700 |
| H | 0.65416500  | 5.38444800  | -0.46106500 |
| H | 1.56076800  | 4.65677100  | -1.81374500 |
| H | -0.06497400 | 5.33128600  | -2.08737000 |
| C | -0.19627600 | 2.63519800  | -2.43196900 |
| H | -0.82463200 | 3.21102600  | -3.13811500 |
| H | 0.78791500  | 2.50585500  | -2.90871300 |
| H | -0.65397200 | 1.64207400  | -2.30091500 |
| C | 0.69970400  | 2.96864500  | 1.93350500  |
| C | 0.82433800  | 4.49848400  | 2.06821200  |
| H | 0.81396500  | 4.76371400  | 3.14298800  |
| H | 1.75422200  | 4.90183600  | 1.63886200  |
| H | -0.02213800 | 5.02520700  | 1.59996600  |
| C | 1.75991900  | 2.28419900  | 2.82070100  |
| H | 1.66842000  | 1.18572500  | 2.76473900  |
| H | 2.79148500  | 2.56078800  | 2.56110400  |
| H | 1.58821600  | 2.58012800  | 3.87284200  |
| C | -0.66939300 | 2.53265500  | 2.49579300  |
| H | -0.72902000 | 2.84730300  | 3.55537400  |
| H | -1.52328700 | 2.97968800  | 1.96928500  |
| H | -0.79332400 | 1.43967400  | 2.45093800  |
| C | 2.74905700  | -2.23393000 | -1.72444700 |
| C | 2.77428300  | -1.09255500 | -2.76431100 |
| H | 1.89257200  | -0.43799300 | -2.65021100 |
| H | 3.67534900  | -0.46629100 | -2.70884500 |
| H | 2.73494800  | -1.53301200 | -3.77842100 |
| C | 1.47185100  | -3.04449600 | -2.02438000 |
| H | 0.57862000  | -2.40655700 | -1.95117500 |
| H | 1.53100300  | -3.43105100 | -3.05941100 |
| H | 1.32665200  | -3.90562800 | -1.35813200 |
| C | 3.97019600  | -3.15266500 | -1.92227900 |
| H | 4.92585500  | -2.67605100 | -1.65600200 |
| H | 3.88241900  | -4.08356500 | -1.33946900 |
| H | 4.03040300  | -3.44434000 | -2.98853300 |
| C | 2.93664800  | -2.77752100 | 1.39169600  |
| C | 4.42234500  | -3.16496400 | 1.51660300  |
| H | 5.05542600  | -2.30204800 | 1.77928400  |
| H | 4.52864500  | -3.91317600 | 2.32613900  |

|   |             |             |             |
|---|-------------|-------------|-------------|
| H | 4.82399000  | -3.61726400 | 0.59693300  |
| C | 2.10237900  | -4.04661900 | 1.13503500  |
| H | 2.46906200  | -4.62385600 | 0.27133300  |
| H | 2.18033300  | -4.70677500 | 2.01967800  |
| H | 1.03496100  | -3.82121800 | 0.98165000  |
| C | 2.47233700  | -2.17892800 | 2.73722000  |
| H | 2.56893900  | -2.94847700 | 3.52685700  |
| H | 3.08578900  | -1.32017300 | 3.05000100  |
| H | 1.41791300  | -1.86126700 | 2.69961100  |
| C | -3.70743300 | 0.35511700  | -1.21836300 |
| C | -2.43201200 | -0.24167100 | -1.34832300 |
| C | -2.01163700 | -0.72257500 | -2.59854800 |
| C | -2.87047700 | -0.60997000 | -3.69012600 |
| C | -4.13999300 | -0.01462800 | -3.54217700 |
| C | -4.57868200 | 0.47858900  | -2.31343300 |
| C | -1.81522500 | -0.17636700 | -0.01765200 |
| H | -1.02127200 | -1.16794000 | -2.71586900 |
| H | -2.55837200 | -0.98192000 | -4.67038900 |
| H | -4.79956600 | 0.06697700  | -4.41179100 |
| H | -5.55806700 | 0.94076400  | -2.20980400 |
| N | -2.66362900 | 0.39851600  | 0.81766200  |
| N | -3.81079700 | 0.73128500  | 0.12334100  |
| C | -4.84640100 | 1.36058200  | 0.82886000  |
| O | -5.88370600 | 1.58412500  | 0.02062500  |
| O | -4.76509400 | 1.64416000  | 2.00194900  |
| C | -7.12251900 | 2.24224400  | 0.48562500  |
| C | -7.98842500 | 2.26719700  | -0.77584800 |
| H | -8.17453000 | 1.24301900  | -1.14224900 |
| H | -8.96034700 | 2.74030900  | -0.55531900 |
| H | -7.49503300 | 2.84289400  | -1.57775800 |
| C | -7.78032100 | 1.39427600  | 1.57871000  |
| H | -7.16210400 | 1.36135700  | 2.48823800  |
| H | -8.76282200 | 1.82678400  | 1.83618200  |
| H | -7.94310600 | 0.36279300  | 1.21995600  |
| C | -6.80735500 | 3.66545200  | 0.95638900  |
| H | -6.28927800 | 4.22846300  | 0.16026000  |
| H | -7.74954700 | 4.19096000  | 1.19024700  |
| H | -6.17600300 | 3.66028400  | 1.85744700  |
| C | -1.19758900 | -1.86515900 | 2.15517100  |
| C | -1.08099000 | -1.77235200 | 0.74418700  |
| C | -1.39478400 | -2.93089600 | 0.00954300  |
| C | -1.76806100 | -4.13237700 | 0.63675500  |
| C | -1.84299100 | -4.20361000 | 2.03694300  |

|   |             |             |             |
|---|-------------|-------------|-------------|
| C | -1.55298100 | -3.05784000 | 2.78662700  |
| H | -1.02455000 | -0.97499200 | 2.76646000  |
| H | -1.37400100 | -2.92620600 | -1.08003900 |
| H | -2.13200200 | -5.13521400 | 2.52631800  |
| H | -1.61456500 | -3.09231600 | 3.87922100  |
| C | -2.06107400 | -5.30697900 | -0.23457100 |
| O | -2.44615400 | -6.39052400 | 0.46144700  |
| O | -1.96517900 | -5.30886500 | -1.44619000 |
| C | -2.74060800 | -7.56930400 | -0.28931000 |
| H | -3.56858300 | -7.38633200 | -0.99439500 |
| H | -1.85500100 | -7.90263600 | -0.85581100 |
| H | -3.03021800 | -8.33274200 | 0.44677300  |

### Substrate 9

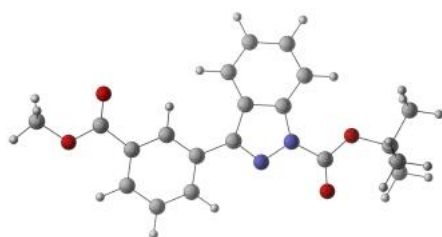

E(RB3LYP) = -1183.71833390

Zero-point correction= 0.367750 (Hartree/Particle)

Thermal correction to Energy= 0.391522

Thermal correction to Enthalpy= 0.392466

Thermal correction to Gibbs Free Energy= 0.312432

Sum of electronic and zero-point Energies= -1183.350584

Sum of electronic and thermal Energies= -1183.326812

Sum of electronic and thermal Enthalpies= -1183.325868

Sum of electronic and thermal Free Energies= -1183.405902

|   |             |             |             |
|---|-------------|-------------|-------------|
| C | 1.48214400  | 1.06241100  | -0.19070300 |
| C | 0.07288700  | 1.13076600  | -0.32467000 |
| C | -0.55332400 | 2.37500700  | -0.53436300 |
| C | 0.23765000  | 3.51788300  | -0.58008400 |
| C | 1.63854400  | 3.43409000  | -0.42452300 |
| C | 2.28425100  | 2.21517400  | -0.23326700 |
| C | -0.37336100 | -0.24705500 | -0.23876100 |
| H | -1.63365800 | 2.44900800  | -0.67195300 |
| H | -0.22858800 | 4.49392000  | -0.74194400 |
| H | 2.23667400  | 4.34956600  | -0.46257000 |

|              |             |             |             |
|--------------|-------------|-------------|-------------|
| H            | 3.36517500  | 2.15931300  | -0.12638600 |
| N            | 0.65288300  | -1.05473700 | -0.08125000 |
| N            | 1.78125200  | -0.29471200 | -0.04596600 |
| C            | 3.01749700  | -0.96535600 | 0.12613300  |
| O            | 4.00636600  | -0.08231400 | 0.15650300  |
| O            | 3.09246700  | -2.16415500 | 0.22344200  |
| C            | 5.42550200  | -0.48223300 | 0.32269800  |
| C            | 6.15987900  | 0.85903900  | 0.29361000  |
| H            | 5.81534300  | 1.51172500  | 1.11394800  |
| H            | 7.24418400  | 0.69447300  | 0.41200400  |
| H            | 5.98944400  | 1.37815300  | -0.66514100 |
| C            | 5.60626400  | -1.17602500 | 1.67544800  |
| H            | 5.07075500  | -2.13664000 | 1.71078500  |
| H            | 6.67995200  | -1.36698000 | 1.84586000  |
| H            | 5.23874100  | -0.53082900 | 2.49246800  |
| C            | 5.84988200  | -1.36437400 | -0.85445100 |
| H            | 5.65327900  | -0.85123700 | -1.81198000 |
| H            | 6.93356200  | -1.56301100 | -0.78809000 |
| H            | 5.31756600  | -2.32740100 | -0.84955300 |
| C            | -1.93724600 | -2.11666800 | -0.78746400 |
| C            | -1.74005200 | -0.79976800 | -0.32362700 |
| C            | -2.86148400 | -0.05526900 | 0.07018100  |
| C            | -4.15210300 | -0.60070100 | -0.00428200 |
| C            | -4.33220300 | -1.91036900 | -0.47489000 |
| C            | -3.21909400 | -2.66317800 | -0.86120400 |
| H            | -1.06913800 | -2.70454700 | -1.09436100 |
| H            | -2.75619900 | 0.95478000  | 0.46762200  |
| H            | -5.33653600 | -2.33325300 | -0.53536600 |
| H            | -3.35330800 | -3.68493600 | -1.22799300 |
| C            | -5.29484900 | 0.25524400  | 0.43809200  |
| O            | -6.47877500 | -0.36202800 | 0.32122600  |
| O            | -5.17591900 | 1.38745200  | 0.85889900  |
| C            | -7.63650900 | 0.37612100  | 0.72084700  |
| H            | -7.57044000 | 0.65481500  | 1.78553800  |
| H            | -7.74156600 | 1.29123200  | 0.11484200  |
| H            | -8.49295600 | -0.29206800 | 0.55389600  |
| (2) L = dppf |             |             |             |
| Precatalyst  |             |             |             |

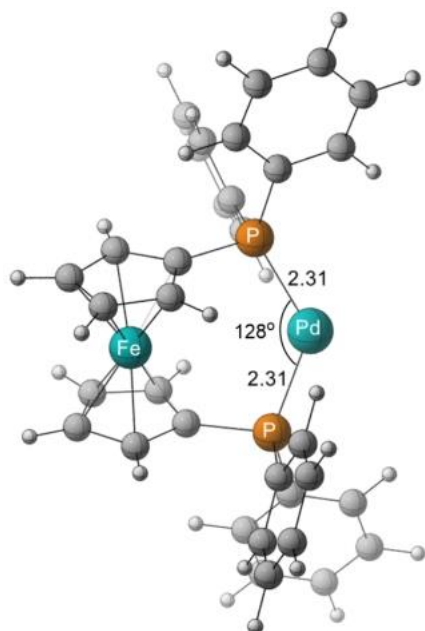

E(RB3LYP) = -3385.59363594

Zero-point correction= 0.516500 (Hartree/Particle)

Thermal correction to Energy= 0.550307

Thermal correction to Enthalpy= 0.551251

Thermal correction to Gibbs Free Energy= 0.446702

Sum of electronic and zero-point Energies= -3385.077136

Sum of electronic and thermal Energies= -3385.043329

Sum of electronic and thermal Enthalpies= -3385.042385

Sum of electronic and thermal Free Energies= -3385.146934

|   |             |             |            |
|---|-------------|-------------|------------|
| C | 1.00617200  | -1.66572400 | 1.58216300 |
| C | 0.93894600  | -1.72266600 | 3.00620400 |
| C | 1.59063600  | -0.56157300 | 3.52413500 |
| C | 2.07370300  | 0.20531100  | 2.41970100 |
| C | 1.72567200  | -0.47722500 | 1.20583000 |
| H | 0.58278300  | -2.39560300 | 0.89212300 |
| H | 0.44736500  | -2.49944000 | 3.59302400 |
| H | 1.68314800  | -0.29273600 | 4.57715900 |
| H | 2.60380600  | 1.15475400  | 2.48517400 |
| F | -0.00003600 | -0.00066300 | 2.30761300 |
| C | -0.93965900 | 1.72050100  | 3.00759200 |
| C | -1.59081100 | 0.55869300  | 3.52459800 |
| C | -1.00690400 | 1.66468400  | 1.58350900 |
| H | -0.44853300 | 2.49710500  | 3.59501800 |
| C | -2.07355400 | -0.20752000 | 2.41954800 |
| H | -1.68320800 | 0.28898300  | 4.57740900 |
| C | -1.72588200 | 0.47617800  | 1.20622400 |



|   |             |             |             |
|---|-------------|-------------|-------------|
| H | -0.58383600 | 2.39531500  | 0.89406600  |
| H | -2.60318500 | -1.15727700 | 2.48425000  |
| P | -2.07229400 | 0.00705900  | -0.54124800 |
| P | 2.07245000  | -0.00696800 | -0.54125000 |
| P | -0.00000300 | 0.00020500  | -1.55370800 |
| C | 3.47585000  | -1.14027100 | -0.98712600 |
| C | 4.19788800  | -1.90317000 | -0.05314200 |
| C | 3.80914600  | -1.24957800 | -2.34989000 |
| C | 5.23396100  | -2.74713300 | -0.47235900 |
| H | 3.95225700  | -1.84286200 | 1.01056900  |
| C | 4.85077200  | -2.08295900 | -2.76778100 |
| H | 3.24094200  | -0.67893700 | -3.09311500 |
| C | 5.56541300  | -2.83691300 | -1.82845400 |
| H | 5.78519600  | -3.33645700 | 0.26733900  |
| H | 5.09853700  | -2.15232700 | -3.83168500 |
| H | 6.37477200  | -3.49759800 | -2.15439600 |
| C | 2.93581800  | 1.62785500  | -0.35606100 |
| C | 2.24453800  | 2.79256000  | -0.73192900 |
| C | 4.24817800  | 1.74928900  | 0.13463000  |
| C | 2.84339400  | 4.05173700  | -0.60882100 |
| H | 1.22820600  | 2.70351400  | -1.13188900 |
| C | 4.84957600  | 3.00676600  | 0.25365500  |
| H | 4.81124300  | 0.85709400  | 0.42382300  |
| C | 4.14814000  | 4.16104200  | -0.11589500 |
| H | 2.29067800  | 4.94837000  | -0.90617400 |
| H | 5.87250700  | 3.08489200  | 0.63531400  |
| H | 4.62120900  | 5.14379800  | -0.02463000 |
| C | -2.93617700 | -1.62763200 | -0.35722700 |
| C | -4.24845200 | -1.74909100 | 0.13367100  |
| C | -2.24532400 | -2.79222700 | -0.73422700 |
| C | -4.85019400 | -3.00649200 | 0.25178500  |
| H | -4.81120900 | -0.85698000 | 0.42372200  |
| C | -2.84451900 | -4.05133000 | -0.61203900 |
| H | -1.22905900 | -2.70311600 | -1.13434100 |
| C | -4.14917900 | -4.16066300 | -0.11888700 |
| H | -5.87306000 | -3.08463300 | 0.63361300  |
| H | -2.29213900 | -4.94788100 | -0.91026300 |
| H | -4.62250300 | -5.14335900 | -0.02831300 |
| C | -3.47521400 | 1.14112300  | -0.98674900 |
| C | -3.80713300 | 1.25261200  | -2.34966600 |
| C | -4.19829800 | 1.90241900  | -0.05225700 |
| C | -4.84844700 | 2.08654200  | -2.76725900 |
| H | -3.23805600 | 0.68327800  | -3.09322400 |

|   |             |            |             |
|---|-------------|------------|-------------|
| C | -5.23406000 | 2.74691900 | -0.47114400 |
| H | -3.95370100 | 1.84046200 | 1.01160100  |
| C | -5.56414800 | 2.83885600 | -1.82743300 |
| H | -5.09512900 | 2.15763000 | -3.83130200 |
| H | -5.78611600 | 3.33497500 | 0.26894900  |
| H | -6.37326600 | 3.49996200 | -2.15312000 |

### Int-1

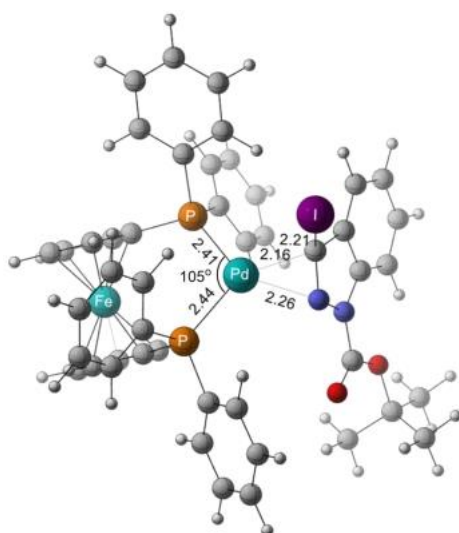

E(RB3LYP) = -4407.90690466

Zero-point correction= 0.750578 (Hartree/Particle)

Thermal correction to Energy 0.802186

Thermal correction to Enthalpy= 0.803130

Thermal correction to Gibbs Free Energy 0.659733

Sum of electronic and zero-point Energies= -4407.156327

Sum of electronic and thermal Energies= -4407.104719

Sum of electronic and thermal Enthalpies= -4407.103774

Sum of electronic and thermal Free Energies= -4407.247172

|   |            |             |             |
|---|------------|-------------|-------------|
| C | 3.89260500 | 0.47715400  | -0.95152700 |
| C | 4.71136800 | 0.99398600  | -1.99963100 |
| C | 4.24760900 | 0.44685600  | -3.23462100 |
| C | 3.14999200 | -0.42009500 | -2.95050700 |
| C | 2.92009900 | -0.41330900 | -1.53128200 |
| H | 3.98884300 | 0.71644100  | 0.10698400  |
| H | 5.52616700 | 1.70861900  | -1.87868200 |
| H | 4.64498900 | 0.66946400  | -4.22550200 |
| H | 2.57205700 | -0.97935200 | -3.68461700 |
| F | 2.71607700 | 1.50655100  | -2.29846900 |
| C | 1.49137200 | 2.53438600  | -3.64458400 |
| C | 2.50465500 | 3.40536300  | -3.13921400 |

|   |             |             |             |
|---|-------------|-------------|-------------|
| C | 0.73681800  | 2.04739400  | -2.53745700 |
| H | 1.33993100  | 2.26386100  | -4.69000000 |
| C | 2.37474100  | 3.46504100  | -1.71939000 |
| H | 3.26648100  | 3.91434600  | -3.73085500 |
| C | 1.27587400  | 2.62186500  | -1.33044700 |
| H | -0.09593100 | 1.34590200  | -2.58619600 |
| H | 3.02129600  | 4.02565600  | -1.04589200 |
| P | 0.62826700  | 2.20867700  | 0.32719400  |
| P | 1.66837400  | -1.37404700 | -0.58432800 |
| P | -0.04070800 | -0.12549300 | 0.57409500  |
| C | -3.18078400 | -1.91043000 | 0.01256700  |
| C | -2.15970200 | -2.52143300 | 0.77569500  |
| C | -1.95517800 | -3.90415300 | 0.71801900  |
| C | -2.77228000 | -4.66586600 | -0.11889400 |
| C | -3.77626500 | -4.04904600 | -0.88758800 |
| C | -3.99723400 | -2.66942100 | -0.83853000 |
| C | -1.50962600 | -1.42547400 | 1.48884100  |
| H | -1.17754200 | -4.37641900 | 1.32419000  |
| H | -2.63398000 | -5.74941300 | -0.17604200 |
| H | -4.40806600 | -4.66158100 | -1.53810100 |
| H | -4.78226000 | -2.20593500 | -1.43145200 |
| N | -2.17562300 | -0.26808000 | 1.28712100  |
| N | -3.15171900 | -0.54056800 | 0.32516800  |
| C | -3.99178800 | 0.50592800  | -0.07064600 |
| O | -4.90220700 | 0.05980700  | -0.93791300 |
| O | -3.86548300 | 1.63947800  | 0.33155900  |
| C | -5.92130600 | 0.94460900  | -1.54100600 |
| C | -6.70883800 | -0.00944800 | -2.44168100 |
| H | -7.16589200 | -0.81973600 | -1.84809300 |
| H | -7.51374000 | 0.54011800  | -2.95853700 |
| H | -6.05048900 | -0.46066700 | -3.20387200 |
| C | -6.82057200 | 1.52220000  | -0.44377200 |
| H | -6.26284000 | 2.20424800  | 0.21520000  |
| H | -7.65084700 | 2.08219200  | -0.90815700 |
| H | -7.25358800 | 0.71012500  | 0.16627900  |
| C | -5.23483400 | 2.03347700  | -2.37129300 |
| H | -4.55610900 | 1.58002000  | -3.11494600 |
| H | -5.99913800 | 2.61567500  | -2.91489500 |
| H | -4.65767300 | 2.72078100  | -1.73490100 |
| I | -0.73656200 | -1.73606000 | 3.53668100  |
| C | 2.74098400  | -2.61700200 | 0.28323700  |
| C | 4.10185200  | -2.81174800 | -0.01435900 |
| C | 2.15453700  | -3.40241200 | 1.29106300  |

|      |             |             |             |
|------|-------------|-------------|-------------|
| C    | 4.85168100  | -3.77108200 | 0.67659100  |
| H    | 4.58612300  | -2.21571200 | -0.79130700 |
| C    | 2.90065000  | -4.36632400 | 1.97566500  |
| H    | 1.10381400  | -3.25235500 | 1.55131400  |
| C    | 4.25418900  | -4.55201900 | 1.67160400  |
| H    | 5.90977200  | -3.90814100 | 0.43228900  |
| H    | 2.42381400  | -4.96698500 | 2.75641000  |
| H    | 4.84250800  | -5.30054900 | 2.21133000  |
| C    | 0.90424300  | -2.37854900 | -1.94777000 |
| C    | 1.51040500  | -3.53518700 | -2.46891100 |
| C    | -0.31425300 | -1.94694000 | -2.49924400 |
| C    | 0.91418400  | -4.23751400 | -3.52176000 |
| H    | 2.45607600  | -3.89465500 | -2.05430700 |
| C    | -0.90510000 | -2.64253000 | -3.55988200 |
| H    | -0.81010400 | -1.06289100 | -2.08476900 |
| C    | -0.29262900 | -3.79102700 | -4.07279800 |
| H    | 1.39715000  | -5.13807200 | -3.91388300 |
| H    | -1.85301900 | -2.29066900 | -3.97818300 |
| H    | -0.75751700 | -4.34106000 | -4.89688800 |
| C    | 1.97776900  | 2.70729000  | 1.49748800  |
| C    | 2.37297600  | 4.04916200  | 1.65264800  |
| C    | 2.60371600  | 1.72397300  | 2.28171600  |
| C    | 3.38666100  | 4.39302800  | 2.55202700  |
| H    | 1.87961300  | 4.83694100  | 1.07618300  |
| C    | 3.61617900  | 2.06813800  | 3.18598800  |
| H    | 2.28962600  | 0.67941400  | 2.18771300  |
| C    | 4.01253700  | 3.40247400  | 3.31934800  |
| H    | 3.68508900  | 5.44061100  | 2.65850900  |
| H    | 4.09110500  | 1.28973600  | 3.79094900  |
| H    | 4.80239700  | 3.67359100  | 4.02669200  |
| C    | -0.61476400 | 3.54649700  | 0.64515700  |
| C    | -1.15153900 | 3.65895100  | 1.94187100  |
| C    | -1.07974500 | 4.41376100  | -0.35648800 |
| C    | -2.11806600 | 4.62449500  | 2.23196100  |
| H    | -0.81019800 | 2.98578100  | 2.73541600  |
| C    | -2.05605200 | 5.37613200  | -0.06653800 |
| H    | -0.67859800 | 4.34612400  | -1.37123800 |
| C    | -2.57575700 | 5.48652700  | 1.22669500  |
| H    | -2.52030000 | 4.70160700  | 3.24700100  |
| H    | -2.40577100 | 6.04642700  | -0.85820400 |
| H    | -3.33589800 | 6.24080600  | 1.45244000  |
| TS-1 |             |             |             |

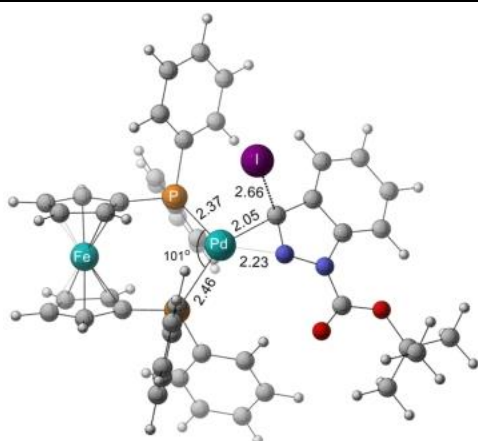

Zero-point correction= 0.751637 (Hartree/Particle)  
 Thermal correction to Energy= 0.802423  
 Thermal correction to Enthalpy= 0.803367  
 Thermal correction to Gibbs Free Energy= 0.661776  
 Sum of electronic and zero-point Energies= -4407.156690  
 Sum of electronic and thermal Energies= -4407.105903  
 Sum of electronic and thermal Enthalpies= -4407.104959  
 Sum of electronic and thermal Free Energies= -4407.246550

|   |             |             |             |
|---|-------------|-------------|-------------|
| C | -3.42403900 | -0.07054100 | 1.67800100  |
| C | -4.72588300 | -0.55555400 | 1.99655500  |
| C | -5.56477200 | -0.35420300 | 0.85863700  |
| C | -4.78724000 | 0.25914700  | -0.16762900 |
| C | -3.44723400 | 0.43938300  | 0.32954600  |
| H | -2.55295900 | -0.09202400 | 2.33246500  |
| H | -5.01886700 | -1.02645100 | 2.93525600  |
| H | -6.61140900 | -0.64809000 | 0.77285300  |
| H | -5.14302300 | 0.51224200  | -1.16492900 |
| F | -3.93420700 | -1.55365100 | 0.33830000  |
| C | -4.42104200 | -3.02938500 | -1.05219700 |
| C | -4.44354700 | -3.57945700 | 0.26518200  |
| C | -3.11667200 | -2.50478200 | -1.29292000 |
| H | -5.26169700 | -2.98690400 | -1.74529800 |
| C | -3.14985900 | -3.40886700 | 0.84105200  |
| H | -5.30511600 | -4.03118400 | 0.75764800  |
| C | -2.31272800 | -2.74128900 | -0.11957300 |
| H | -2.78935100 | -2.00610600 | -2.20458400 |
| H | -2.85134600 | -3.71047100 | 1.84378900  |
| P | -0.57951100 | -2.20407000 | 0.11039700  |
| P | -1.99450900 | 1.18978500  | -0.48547300 |
| P | 0.05262300  | 0.17096000  | 0.12179000  |
| C | 3.46322800  | 1.81272500  | -0.76693500 |

|   |             |             |             |
|---|-------------|-------------|-------------|
| C | 2.25773700  | 2.50564300  | -0.49158500 |
| C | 2.03190600  | 3.77649200  | -1.03653000 |
| C | 3.00766900  | 4.33243700  | -1.86242200 |
| C | 4.19687400  | 3.62908700  | -2.13923200 |
| C | 4.44785700  | 2.36644300  | -1.59890300 |
| C | 1.49081300  | 1.61130200  | 0.36770800  |
| H | 1.11531700  | 4.32138400  | -0.80167000 |
| H | 2.85378400  | 5.32472200  | -2.29628500 |
| H | 4.94976900  | 4.08344200  | -2.79068200 |
| H | 5.37343800  | 1.83615500  | -1.81300200 |
| N | 2.19454300  | 0.52339000  | 0.62272900  |
| N | 3.39374000  | 0.59192100  | -0.07468600 |
| C | 4.34866100  | -0.40606600 | 0.14601000  |
| O | 5.47750200  | -0.11353500 | -0.49592600 |
| O | 4.12212800  | -1.38566200 | 0.82141700  |
| C | 6.67860400  | -0.97682000 | -0.43191500 |
| C | 7.68746700  | -0.21683200 | -1.29516900 |
| H | 7.87230900  | 0.79049200  | -0.88444800 |
| H | 8.64527500  | -0.76349900 | -1.32186500 |
| H | 7.31751000  | -0.11246900 | -2.32970400 |
| C | 7.16517800  | -1.07437500 | 1.01685300  |
| H | 6.44024700  | -1.60772800 | 1.64991800  |
| H | 8.12367100  | -1.62118500 | 1.04401500  |
| H | 7.33275000  | -0.06683800 | 1.43601500  |
| C | 6.36424200  | -2.34668500 | -1.03954000 |
| H | 5.96320500  | -2.23160700 | -2.06189100 |
| H | 7.29241500  | -2.94094300 | -1.10111000 |
| H | 5.63453500  | -2.89987900 | -0.42952900 |
| I | 0.81473500  | 2.88324700  | 2.60421500  |
| C | -2.25078600 | 2.99381800  | -0.17470000 |
| C | -1.65818700 | 3.93722700  | -1.03299100 |
| C | -2.99322500 | 3.45129900  | 0.92633400  |
| C | -1.81023300 | 5.30650500  | -0.79850700 |
| H | -1.08025300 | 3.60404100  | -1.89977800 |
| C | -3.14234700 | 4.82271100  | 1.16137700  |
| H | -3.46321200 | 2.73907400  | 1.60870000  |
| C | -2.55207900 | 5.75397700  | 0.30162200  |
| H | -1.34808400 | 6.02722700  | -1.48018200 |
| H | -3.72613400 | 5.16205000  | 2.02253800  |
| H | -2.67124000 | 6.82609500  | 0.48524300  |
| C | -2.31015600 | 1.05765400  | -2.30225500 |
| C | -3.39045800 | 1.72425900  | -2.91116000 |
| C | -1.44244700 | 0.29903100  | -3.10561600 |

|   |             |             |             |
|---|-------------|-------------|-------------|
| C | -3.60963400 | 1.61053200  | -4.28686800 |
| H | -4.05958300 | 2.35008100  | -2.31459400 |
| C | -1.66071900 | 0.18832900  | -4.48411600 |
| H | -0.58468800 | -0.20636200 | -2.65079900 |
| C | -2.74697600 | 0.83979000  | -5.07607700 |
| H | -4.45524500 | 2.13221300  | -4.74519700 |
| H | -0.97431100 | -0.40524500 | -5.09521800 |
| H | -2.91764300 | 0.75579700  | -6.15366500 |
| C | -0.14107100 | -2.95676800 | 1.74170700  |
| C | 0.06344200  | -4.34135900 | 1.88157700  |
| C | -0.02035300 | -2.13116000 | 2.87192900  |
| C | 0.37620700  | -4.88721700 | 3.12977600  |
| H | -0.01868500 | -5.00001900 | 1.01220600  |
| C | 0.28945800  | -2.67969900 | 4.12206100  |
| H | -0.15742600 | -1.04944300 | 2.77594100  |
| C | 0.48829600  | -4.05767100 | 4.25268500  |
| H | 0.53525800  | -5.96570600 | 3.22522700  |
| H | 0.38193000  | -2.02437900 | 4.99324000  |
| H | 0.73601600  | -4.48664000 | 5.22848900  |
| C | 0.36591800  | -3.22781800 | -1.10597200 |
| C | 1.75111200  | -3.00118400 | -1.21149000 |
| C | -0.22911100 | -4.19884500 | -1.92894300 |
| C | 2.52251600  | -3.73476300 | -2.11689000 |
| H | 2.23649400  | -2.25883700 | -0.57077000 |
| C | 0.54560400  | -4.92580500 | -2.84147300 |
| H | -1.30119700 | -4.39737900 | -1.86299300 |
| C | 1.92121400  | -4.69605600 | -2.93877500 |
| H | 3.59918100  | -3.55098500 | -2.18152000 |
| H | 0.06718800  | -5.67800800 | -3.47628900 |
| H | 2.52494800  | -5.26484000 | -3.65254700 |

## Int-2

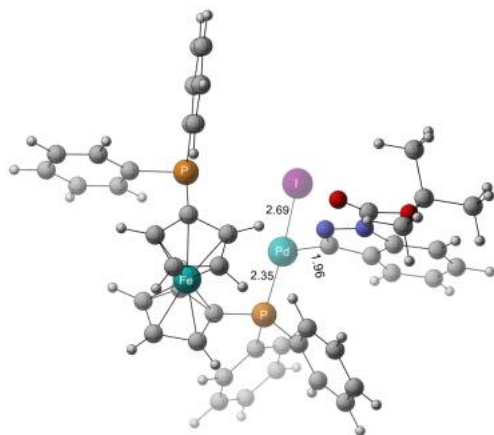

E(RB3LYP) = -4407.94178867  
 Zero-point correction= 0.750800 (Hartree/Particle)  
 Thermal correction to Energy= 0.802304  
 Thermal correction to Enthalpy= 0.803248  
 Thermal correction to Gibbs Free Energy= 0.654862  
 Sum of electronic and zero-point Energies= -4407.190989  
 Sum of electronic and thermal Energies= -4407.139485  
 Sum of electronic and thermal Enthalpies= -4407.138541  
 Sum of electronic and thermal Free Energies= -4407.286927

|   |             |             |             |
|---|-------------|-------------|-------------|
| C | 1.84393100  | -2.49242800 | -0.97379200 |
| C | 2.80310300  | -2.72818800 | -2.00071500 |
| C | 2.13112200  | -2.65716300 | -3.26031900 |
| C | 0.75319600  | -2.38132300 | -3.01849800 |
| C | 0.56130700  | -2.28561400 | -1.59373500 |
| H | 2.03682600  | -2.47779300 | 0.09874800  |
| H | 3.86894500  | -2.90000500 | -1.85023200 |
| H | 2.59557800  | -2.76367800 | -4.24117200 |
| H | -0.02161200 | -2.26503400 | -3.77568500 |
| F | 1.93227900  | -0.85224200 | -2.24541700 |
| C | 1.34573100  | 0.97135900  | -3.07556600 |
| C | 2.62742200  | 0.58460800  | -3.57318200 |
| C | 1.43598400  | 1.08428900  | -1.65498200 |
| H | 0.45160800  | 1.13318500  | -3.67809600 |
| C | 3.51528300  | 0.46518100  | -2.46209000 |
| H | 2.87864600  | 0.38639200  | -4.61592200 |
| C | 2.78657900  | 0.77930100  | -1.26272600 |
| H | 0.62065800  | 1.35893100  | -0.98178900 |
| H | 4.56159200  | 0.16530500  | -2.51106000 |
| P | 3.34776300  | 0.84394000  | 0.48406000  |
| P | -0.99895200 | -2.25348800 | -0.66556200 |
| P | -0.77661600 | -1.29712400 | 1.46451100  |
| C | -3.68285600 | 1.62513600  | 0.73167000  |
| C | -3.33900300 | 0.34971500  | 1.24479800  |
| C | -4.30918100 | -0.45826000 | 1.85948400  |
| C | -5.61219300 | 0.02246200  | 1.94797900  |
| C | -5.94400200 | 1.29483000  | 1.43297600  |
| C | -4.99640100 | 2.11489300  | 0.82151100  |
| C | -1.92181200 | 0.21266900  | 0.97417200  |
| H | -4.03845000 | -1.43875300 | 2.26032400  |
| H | -6.38813500 | -0.58552300 | 2.42201500  |
| H | -6.97511600 | 1.65208000  | 1.51633000  |
| H | -5.26569200 | 3.09453600  | 0.43197600  |



|   |             |             |             |
|---|-------------|-------------|-------------|
| N | -1.45440600 | 1.26619000  | 0.37028600  |
| N | -2.50156100 | 2.15333800  | 0.20409000  |
| C | -2.23826600 | 3.36335600  | -0.46266700 |
| O | -3.34900900 | 4.09084800  | -0.53626100 |
| O | -1.14483000 | 3.64813600  | -0.88935200 |
| C | -3.38778100 | 5.41816500  | -1.19190000 |
| C | -4.85102300 | 5.83356400  | -1.02845900 |
| H | -5.12464100 | 5.88913000  | 0.03913100  |
| H | -5.01188200 | 6.82658500  | -1.48118600 |
| H | -5.52070200 | 5.11131600  | -1.52617300 |
| C | -2.45968100 | 6.38422400  | -0.45030500 |
| H | -1.40564600 | 6.08352600  | -0.54679500 |
| H | -2.57554400 | 7.39792300  | -0.87151500 |
| H | -2.72283200 | 6.42556300  | 0.62109600  |
| C | -3.02463700 | 5.27204600  | -2.67256700 |
| H | -3.67556500 | 4.52289800  | -3.15671200 |
| H | -3.17638000 | 6.23895700  | -3.18300000 |
| H | -1.97482800 | 4.96912100  | -2.80203700 |
| I | -0.40329100 | -0.51043400 | 4.01097700  |
| C | 3.90607100  | 2.60806200  | 0.64904200  |
| C | 3.89144300  | 3.54698900  | -0.39612700 |
| C | 4.31238000  | 3.03319900  | 1.92896000  |
| C | 4.28469400  | 4.87254300  | -0.17035900 |
| H | 3.57172100  | 3.24651300  | -1.39749800 |
| C | 4.71593000  | 4.35238600  | 2.15232300  |
| H | 4.31212600  | 2.32319900  | 2.76355600  |
| C | 4.70162400  | 5.27834600  | 1.10130100  |
| H | 4.26661200  | 5.59033500  | -0.99676500 |
| H | 5.03354600  | 4.66168400  | 3.15320500  |
| H | 5.00934700  | 6.31405700  | 1.27588600  |
| C | 4.97525500  | -0.05300000 | 0.41624900  |
| C | 5.03809200  | -1.33667000 | 0.98684000  |
| C | 6.14366600  | 0.48910800  | -0.15002500 |
| C | 6.22993600  | -2.07125800 | 0.97374200  |
| H | 4.14644300  | -1.76487500 | 1.45647600  |
| C | 7.33669500  | -0.24128600 | -0.16028800 |
| H | 6.12540900  | 1.49329700  | -0.58372800 |
| C | 7.38202600  | -1.52455500 | 0.39869600  |
| H | 6.25942400  | -3.06889100 | 1.42298600  |
| H | 8.23667800  | 0.19503200  | -0.60519600 |
| H | 8.31684700  | -2.09373300 | 0.39262500  |
| C | -1.37486000 | -4.03643600 | -0.37077500 |
| C | -0.82589200 | -5.05361200 | -1.17158400 |

|   |             |             |             |
|---|-------------|-------------|-------------|
| C | -2.23290900 | -4.38648000 | 0.68806200  |
| C | -1.13668400 | -6.39364800 | -0.91983400 |
| H | -0.15270500 | -4.80409500 | -1.99537100 |
| C | -2.54571100 | -5.72729500 | 0.93356800  |
| H | -2.65920800 | -3.60753300 | 1.32776600  |
| C | -1.99668200 | -6.73316900 | 0.13091700  |
| H | -0.70233500 | -7.17636500 | -1.54897800 |
| H | -3.21513300 | -5.98498200 | 1.75956400  |
| H | -2.23555100 | -7.78288400 | 0.32675500  |
| C | -2.27686900 | -1.67919700 | -1.85622500 |
| C | -2.16017600 | -0.39883200 | -2.42831700 |
| C | -3.38514600 | -2.47771800 | -2.18628700 |
| C | -3.12814300 | 0.06594900  | -3.32255600 |
| H | -1.31368400 | 0.23928700  | -2.17112000 |
| C | -4.35459500 | -2.00562400 | -3.07846600 |
| H | -3.49797700 | -3.47404000 | -1.75299200 |
| C | -4.22836500 | -0.73573500 | -3.64958700 |
| H | -3.02241900 | 1.06210200  | -3.76282100 |
| H | -5.21104300 | -2.63906600 | -3.32819400 |
| H | -4.98670200 | -0.36941100 | -4.34815000 |

### Int-3

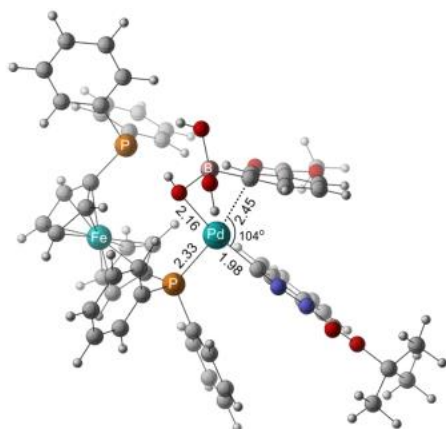

E(RB3LYP) = -4821.53981630

Zero-point correction= 0.933000 (Hartree/Particle)

Thermal correction to Energy= 0.997798

Thermal correction to Enthalpy= 0.998742

Thermal correction to Gibbs Free Energy= 0.825825

Sum of electronic and zero-point Energies= -4820.606816

Sum of electronic and thermal Energies= -4820.542018

Sum of electronic and thermal Enthalpies= -4820.541074

Sum of electronic and thermal Free Energies= -4820.713992

|   |              |             |             |
|---|--------------|-------------|-------------|
| C | 3.67577100   | -2.08119600 | -0.24847000 |
| C | 3.94787100   | -3.26841000 | 0.49323200  |
| C | 4.69140100   | -2.89833300 | 1.65626100  |
| C | 4.88649700   | -1.48347700 | 1.62968200  |
| C | 4.26375400   | -0.96384100 | 0.44310500  |
| H | 3.10282000   | -2.01672400 | -1.17316400 |
| H | 3.61976700   | -4.27503300 | 0.23329500  |
| H | 5.02716700   | -3.57318000 | 2.44453500  |
| H | 5.39872900   | -0.89579300 | 2.39105000  |
| F | 2.86152300   | -1.92005200 | 1.65263100  |
| C | 2.05444100   | -0.92040000 | 3.29561400  |
| C | 2.01995600   | -2.33305400 | 3.50936700  |
| C | 1.29622000   | -0.63185500 | 2.12445400  |
| H | 2.58742600   | -0.19114200 | 3.90569200  |
| C | 1.24903600   | -2.92531400 | 2.46663500  |
| H | 2.52478400   | -2.87283400 | 4.31113700  |
| C | 0.78346000   | -1.87040500 | 1.59981500  |
| H | 1.13450800   | 0.35204700  | 1.68463300  |
| H | 1.04639900   | -3.98950900 | 2.35154900  |
| P | -0.42019900  | -1.99981300 | 0.24014100  |
| P | 4.12845400   | 0.73889400  | -0.21714300 |
| P | -0.52243700  | 0.02202500  | -0.91507500 |
| C | -4.23829000  | 0.95562700  | 0.89512900  |
| C | -2.82510700  | 0.92817800  | 0.99729200  |
| C | -2.18566900  | 1.45525800  | 2.13123100  |
| C | -2.96952100  | 1.99819700  | 3.14603000  |
| C | -4.37667100  | 2.01857200  | 3.03249100  |
| C | -5.03362800  | 1.50407500  | 1.91498100  |
| C | -2.36353300  | 0.30227800  | -0.22868100 |
| H | -1.09609900  | 1.44446100  | 2.20785300  |
| H | -2.49507600  | 2.41406200  | 4.03980300  |
| H | -4.97217100  | 2.45125600  | 3.84246800  |
| H | -6.11882400  | 1.52792200  | 1.83909400  |
| N | -3.37872900  | -0.02184500 | -0.98343500 |
| N | -4.53829100  | 0.36521300  | -0.33454900 |
| C | -5.76571200  | 0.12091500  | -0.97373400 |
| O | -6.76970200  | 0.53308300  | -0.20224300 |
| O | -5.84574800  | -0.39101800 | -2.06476300 |
| C | -8.18595500  | 0.41499200  | -0.61398000 |
| C | -8.93685300  | 1.00660700  | 0.58059400  |
| H | -8.64239000  | 2.05712600  | 0.74653600  |
| H | -10.02368900 | 0.97515400  | 0.39399600  |
| H | -8.72432200  | 0.43273500  | 1.49892900  |

|   |             |             |             |
|---|-------------|-------------|-------------|
| C | -8.42639200 | 1.24850800  | -1.87614700 |
| H | -7.87916000 | 0.83917700  | -2.73856300 |
| H | -9.50447400 | 1.25078200  | -2.11325600 |
| H | -8.10873900 | 2.29349500  | -1.71433800 |
| C | -8.54684700 | -1.06100000 | -0.80664200 |
| H | -8.30504600 | -1.63845200 | 0.10285500  |
| H | -9.63134900 | -1.15096300 | -0.99175900 |
| H | -8.00821800 | -1.49881000 | -1.66028600 |
| C | -0.95929200 | 3.48030600  | -0.85742600 |
| C | -0.03711800 | 2.51896600  | -1.33114000 |
| C | -0.22799400 | 1.82768600  | -2.55100400 |
| C | -1.41690600 | 2.12546600  | -3.26706800 |
| C | -2.33215000 | 3.07175400  | -2.81297700 |
| C | -2.10559600 | 3.75594000  | -1.60767000 |
| H | 0.89105700  | 2.39146600  | -0.76633600 |
| H | -1.59798400 | 1.60567700  | -4.21358900 |
| H | -3.23324600 | 3.28987000  | -3.39449200 |
| H | -2.82203900 | 4.49933600  | -1.25247200 |
| C | -0.65859000 | 4.16689300  | 0.43188500  |
| O | -1.55697800 | 5.11177800  | 0.74168500  |
| O | 0.29552800  | 3.90677200  | 1.13971900  |
| C | -1.36332600 | 5.81475000  | 1.97151200  |
| H | -0.38674500 | 6.32618100  | 1.97741500  |
| H | -2.17904800 | 6.54897700  | 2.03073000  |
| H | -1.41330300 | 5.11920500  | 2.82572000  |
| B | 0.96047500  | 0.84634800  | -3.16464300 |
| O | 2.08494600  | 1.65506800  | -3.56920200 |
| H | 2.68438500  | 1.10408400  | -4.10006100 |
| O | 0.51764900  | -0.00556400 | -4.24998000 |
| H | -0.22140200 | -0.56864000 | -3.97254000 |
| O | 1.35947200  | -0.06799100 | -1.96461300 |
| H | 2.08156600  | 0.35502500  | -1.44872600 |
| C | 5.60502800  | 0.85529200  | -1.33142900 |
| C | 6.75255800  | 0.05082700  | -1.21521900 |
| C | 5.53937100  | 1.79456100  | -2.37777400 |
| C | 7.81833200  | 0.19841000  | -2.11033400 |
| H | 6.81666000  | -0.70276000 | -0.42492100 |
| C | 6.60835600  | 1.94705600  | -3.26744000 |
| H | 4.63357100  | 2.39475400  | -2.51055800 |
| C | 7.75137800  | 1.15027200  | -3.13440300 |
| H | 8.70516500  | -0.43490800 | -2.00694300 |
| H | 6.54267200  | 2.68309600  | -4.07496600 |
| H | 8.58533000  | 1.26399500  | -3.83404100 |

|      |             |             |             |
|------|-------------|-------------|-------------|
| C    | 4.58979800  | 1.81935700  | 1.21670800  |
| C    | 5.88714200  | 1.89078000  | 1.75671900  |
| C    | 3.58191500  | 2.62983800  | 1.76971500  |
| C    | 6.16354500  | 2.73569600  | 2.83641800  |
| H    | 6.69457200  | 1.28978700  | 1.32853000  |
| C    | 3.85879600  | 3.47525300  | 2.85133100  |
| H    | 2.57077100  | 2.62136100  | 1.34969600  |
| C    | 5.14882400  | 3.52778200  | 3.38862200  |
| H    | 7.17775000  | 2.77905500  | 3.24578800  |
| H    | 3.06141400  | 4.10063700  | 3.26463300  |
| H    | 5.36780200  | 4.19136400  | 4.23103800  |
| C    | -1.96414800 | -2.58215500 | 1.05800000  |
| C    | -2.98996600 | -3.13566200 | 0.27034600  |
| C    | -2.16392400 | -2.43929100 | 2.44040300  |
| C    | -4.18588500 | -3.55268600 | 0.85932000  |
| H    | -2.85726400 | -3.24597700 | -0.80946200 |
| C    | -3.36462100 | -2.85616300 | 3.02717300  |
| H    | -1.38379500 | -2.00446000 | 3.06920500  |
| C    | -4.37598900 | -3.41475300 | 2.24017300  |
| H    | -4.97333600 | -3.98654800 | 0.23580000  |
| H    | -3.50528400 | -2.74355800 | 4.10634000  |
| H    | -5.31281600 | -3.74292100 | 2.70064400  |
| C    | 0.07745200  | -3.43641700 | -0.80346400 |
| C    | 0.63563200  | -3.23559400 | -2.07729100 |
| C    | -0.08754100 | -4.74997100 | -0.32379800 |
| C    | 1.02675700  | -4.33315000 | -2.85357500 |
| H    | 0.77745500  | -2.22333700 | -2.46137500 |
| C    | 0.31139300  | -5.84107500 | -1.10081600 |
| H    | -0.54128700 | -4.93126600 | 0.65405600  |
| C    | 0.86912000  | -5.63493000 | -2.36829700 |
| H    | 1.45665000  | -4.16464100 | -3.84552000 |
| H    | 0.17852000  | -6.85648900 | -0.71551700 |
| H    | 1.17483000  | -6.49028400 | -2.97849300 |
| TS-2 |             |             |             |

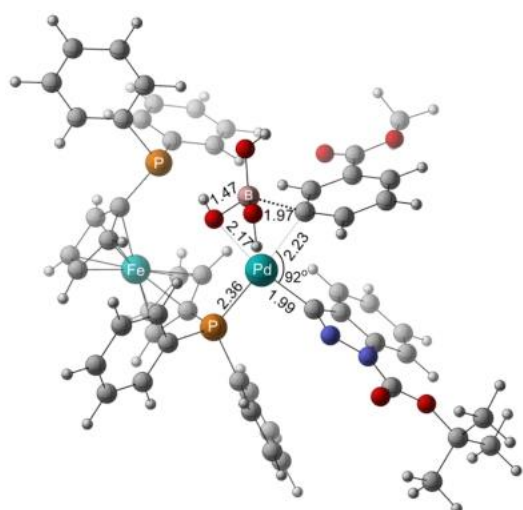

E(RB3LYP) = -4821.53025852  
 Zero-point correction= 0.931255 (Hartree/Particle)  
 Thermal correction to Energy= 0.995951  
 Thermal correction to Enthalpy= 0.996895  
 Thermal correction to Gibbs Free Energy= 0.822837  
 Sum of electronic and zero-point Energies= -4820.599003  
 Sum of electronic and thermal Energies= -4820.534307  
 Sum of electronic and thermal Enthalpies= -4820.533363  
 Sum of electronic and thermal Free Energies= -4820.707422

|   |             |             |             |
|---|-------------|-------------|-------------|
| C | 3.53136400  | -2.36657100 | -0.27897700 |
| C | 3.74456900  | -3.55763700 | 0.47542100  |
| C | 4.51306900  | -3.21369600 | 1.63007800  |
| C | 4.78202800  | -1.81162900 | 1.58593200  |
| C | 4.18093200  | -1.27391000 | 0.39616000  |
| H | 2.96417400  | -2.28756400 | -1.20605200 |
| H | 3.36324800  | -4.54862400 | 0.22855400  |
| H | 4.81746100  | -3.89613400 | 2.42449400  |
| H | 5.32928300  | -1.24349100 | 2.33749000  |
| F | 2.73648100  | -2.14149900 | 1.62565200  |
| C | 1.99058800  | -1.09304100 | 3.26739400  |
| C | 1.89012800  | -2.50125900 | 3.48989400  |
| C | 1.23608400  | -0.77551200 | 2.10111100  |
| H | 2.56215700  | -0.38675200 | 3.86962000  |
| C | 1.08172700  | -3.06065600 | 2.45713700  |
| H | 2.37542100  | -3.06017300 | 4.29066600  |
| C | 0.66015400  | -1.99067300 | 1.58768300  |
| H | 1.11242000  | 0.21390000  | 1.66097900  |
| H | 0.82735300  | -4.11455800 | 2.34962900  |
| P | -0.55110800 | -2.05809300 | 0.22583500  |

|   |              |             |             |
|---|--------------|-------------|-------------|
| P | 4.13699300   | 0.42434900  | -0.28258100 |
| P | -0.59312500  | -0.00401600 | -0.94018100 |
| C | -4.30534700  | 1.06189900  | 0.79557000  |
| C | -2.89026700  | 1.05545000  | 0.86349200  |
| C | -2.22800500  | 1.67907100  | 1.93352700  |
| C | -2.99119400  | 2.29584600  | 2.92170900  |
| C | -4.40072900  | 2.29382400  | 2.84328500  |
| C | -5.08034600  | 1.68402100  | 1.78854800  |
| C | -2.44728100  | 0.33064700  | -0.31476900 |
| H | -1.13601100  | 1.68141400  | 1.98161000  |
| H | -2.49925800  | 2.78851100  | 3.76562000  |
| H | -4.98061400  | 2.78556000  | 3.63074800  |
| H | -6.16739800  | 1.69197500  | 1.74003000  |
| N | -3.47656100  | -0.05939100 | -1.01950700 |
| N | -4.62795000  | 0.36992100  | -0.37368200 |
| C | -5.86607500  | 0.05159800  | -0.95067800 |
| O | -6.85651700  | 0.54223700  | -0.20540300 |
| O | -5.97101400  | -0.57809500 | -1.97682800 |
| C | -8.27987000  | 0.36038300  | -0.56095500 |
| C | -9.00880500  | 1.08164400  | 0.57474000  |
| H | -8.72269000  | 2.14694600  | 0.60831300  |
| H | -10.09947100 | 1.01870700  | 0.42108500  |
| H | -8.76708300  | 0.62218400  | 1.54857000  |
| C | -8.56707200  | 1.03492700  | -1.90588900 |
| H | -8.03778200  | 0.53195900  | -2.72897900 |
| H | -9.65127400  | 0.99758300  | -2.11007700 |
| H | -8.25956100  | 2.09503900  | -1.87842500 |
| C | -8.62431700  | -1.13211200 | -0.56661400 |
| H | -8.35079600  | -1.59375800 | 0.39840300  |
| H | -9.71159500  | -1.25676700 | -0.71076100 |
| H | -8.10026900  | -1.66220000 | -1.37585100 |
| C | -0.44980500  | 4.11594900  | -0.61642300 |
| C | 0.06238300   | 2.83926800  | -0.89272200 |
| C | -0.47292700  | 2.00600300  | -1.89850100 |
| C | -1.56705300  | 2.52545200  | -2.62760200 |
| C | -2.07539300  | 3.80702500  | -2.39071100 |
| C | -1.52372700  | 4.60351900  | -1.38281000 |
| H | 0.92142600   | 2.49969500  | -0.30639900 |
| H | -2.01796400  | 1.91508700  | -3.41690500 |
| H | -2.91125400  | 4.18741200  | -2.98634300 |
| H | -1.92482800  | 5.59929300  | -1.18239500 |
| C | 0.15625500   | 4.89969100  | 0.49824600  |
| O | -0.35005900  | 6.13802500  | 0.60072200  |

|   |             |             |             |
|---|-------------|-------------|-------------|
| O | 1.01301100  | 4.47578800  | 1.24974400  |
| C | 0.15425100  | 6.96139000  | 1.65471700  |
| H | 1.23955400  | 7.11865900  | 1.54016000  |
| H | -0.37978700 | 7.91852800  | 1.57202900  |
| H | -0.04071200 | 6.49899400  | 2.63662000  |
| B | 0.83847700  | 0.96935600  | -2.94226700 |
| O | 1.85680000  | 1.89638100  | -3.25547900 |
| H | 1.57047600  | 2.46526100  | -3.98790000 |
| O | 0.14700800  | 0.45025100  | -4.06437700 |
| H | -0.57309100 | -0.14600300 | -3.80419000 |
| O | 1.30915500  | -0.03618200 | -1.98261000 |
| H | 2.07614300  | 0.29352700  | -1.45322700 |
| C | 5.59956100  | 0.45139500  | -1.41988800 |
| C | 6.66205700  | -0.46744200 | -1.36482300 |
| C | 5.61553200  | 1.44789500  | -2.41391400 |
| C | 7.72564600  | -0.37908200 | -2.27067700 |
| H | 6.66147700  | -1.26207900 | -0.61321000 |
| C | 6.68274700  | 1.54092100  | -3.31302900 |
| H | 4.77570800  | 2.14569900  | -2.49625400 |
| C | 7.74155200  | 0.62775000  | -3.24249900 |
| H | 8.54605400  | -1.10166700 | -2.21562600 |
| H | 6.68141700  | 2.32263300  | -4.07921400 |
| H | 8.57376500  | 0.69533100  | -3.95011000 |
| C | 4.69078100  | 1.49605000  | 1.12343000  |
| C | 5.99171900  | 1.46211600  | 1.65941200  |
| C | 3.76639300  | 2.41370200  | 1.65176600  |
| C | 6.34928900  | 2.30992300  | 2.71237400  |
| H | 6.73815800  | 0.77646900  | 1.24771300  |
| C | 4.12533100  | 3.26637500  | 2.70295600  |
| H | 2.75757500  | 2.48825100  | 1.23559500  |
| C | 5.41586200  | 3.21287400  | 3.23828400  |
| H | 7.36426600  | 2.27022000  | 3.12017600  |
| H | 3.39044000  | 3.97985000  | 3.08733300  |
| H | 5.70032900  | 3.88016100  | 4.05792600  |
| C | -0.10348600 | -3.51273700 | -0.81778500 |
| C | 0.45602100  | -3.30957500 | -2.09085600 |
| C | -0.30263500 | -4.82828900 | -0.35885800 |
| C | 0.81649000  | -4.40357100 | -2.88664800 |
| H | 0.62102800  | -2.29418600 | -2.45911800 |
| C | 0.06256100  | -5.91783900 | -1.15488300 |
| H | -0.75747500 | -5.01112100 | 0.61836700  |
| C | 0.62284000  | -5.70775900 | -2.42081300 |
| H | 1.24909100  | -4.23176800 | -3.87682800 |



|   |             |             |             |
|---|-------------|-------------|-------------|
| H | -0.09753100 | -6.93541400 | -0.78577400 |
| H | 0.90285700  | -6.56180900 | -3.04503900 |
| C | -2.11026500 | -2.58889600 | 1.05373600  |
| C | -3.14951800 | -3.13640600 | 0.27997900  |
| C | -2.31419700 | -2.39429400 | 2.42962300  |
| C | -4.36037200 | -3.49891900 | 0.87551900  |
| H | -3.01590600 | -3.28581500 | -0.79490000 |
| C | -3.52966000 | -2.75493000 | 3.02321900  |
| H | -1.52407800 | -1.96241800 | 3.04844500  |
| C | -4.55361100 | -3.30988200 | 2.24960900  |
| H | -5.15746400 | -3.92890400 | 0.26151000  |
| H | -3.67210500 | -2.60220300 | 4.09730400  |
| H | -5.50193600 | -3.59500500 | 2.71529700  |

#### Int-4

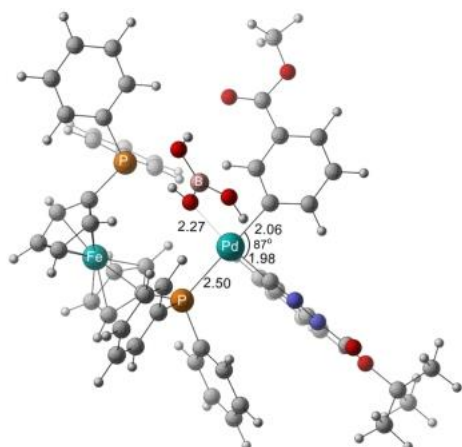

E(RB3LYP) = -4821.56835184

Zero-point correction= 0.932826 (Hartree/Particle)

Thermal correction to Energy= 0.998229

Thermal correction to Enthalpy= 0.999173

Thermal correction to Gibbs Free Energy= 0.821622

Sum of electronic and zero-point Energies= -4820.635526

Sum of electronic and thermal Energies= -4820.570123

Sum of electronic and thermal Enthalpies= -4820.569179

Sum of electronic and thermal Free Energies= -4820.746730

|   |            |             |             |
|---|------------|-------------|-------------|
| C | 3.22548800 | -2.51613800 | -0.80803700 |
| C | 3.32985200 | -3.90521700 | -0.50655700 |
| C | 4.04795400 | -4.03575100 | 0.72189300  |
| C | 4.39487200 | -2.72854500 | 1.17822000  |
| C | 3.89299300 | -1.77085500 | 0.22975200  |
| H | 2.71679100 | -2.08811400 | -1.67126700 |
| H | 2.91030400 | -4.72077900 | -1.09582000 |

|   |              |             |             |
|---|--------------|-------------|-------------|
| H | 4.26770100   | -4.97009400 | 1.23967100  |
| H | 4.92715600   | -2.49645900 | 2.10007500  |
| F | 2.33578500   | -2.89646900 | 1.02644800  |
| C | 1.56353000   | -2.43454800 | 2.90607300  |
| C | 1.35627700   | -3.81701800 | 2.60962300  |
| C | 0.90094700   | -1.66765200 | 1.90401700  |
| H | 2.14470100   | -2.03507200 | 3.73723000  |
| C | 0.57271400   | -3.90637400 | 1.42128500  |
| H | 1.75632600   | -4.66084800 | 3.17281000  |
| C | 0.27514600   | -2.56916800 | 0.97360800  |
| H | 0.86680900   | -0.58063600 | 1.83931000  |
| H | 0.26052100   | -4.83177700 | 0.93981300  |
| P | -0.86865100  | -2.00275200 | -0.33766000 |
| P | 3.95666700   | 0.05439900  | 0.21267100  |
| P | -0.71046900  | 0.46209600  | -0.71828400 |
| C | -4.33168900  | 1.14807700  | 1.36153900  |
| C | -2.92152800  | 1.01600400  | 1.37837800  |
| C | -2.21242300  | 1.13618100  | 2.58419500  |
| C | -2.92360500  | 1.38011900  | 3.75683900  |
| C | -4.32930800  | 1.50407400  | 3.72718400  |
| C | -5.05523800  | 1.39273100  | 2.54062100  |
| C | -2.52983200  | 0.76999100  | 0.00024300  |
| H | -1.12313100  | 1.03941100  | 2.59354000  |
| H | -2.39379900  | 1.47797400  | 4.70907700  |
| H | -4.86903500  | 1.69539200  | 4.66012900  |
| H | -6.13875200  | 1.49330200  | 2.53296400  |
| N | -3.58759400  | 0.76491600  | -0.77087100 |
| N | -4.70553900  | 0.98911100  | 0.02592400  |
| C | -5.96192900  | 1.02000000  | -0.59283500 |
| O | -6.91366300  | 1.24119900  | 0.31571300  |
| O | -6.11604500  | 0.86505400  | -1.78194400 |
| C | -8.34422500  | 1.33113100  | -0.04212400 |
| C | -9.01747100  | 1.58396100  | 1.30865200  |
| H | -8.64570300  | 2.51903200  | 1.76174100  |
| H | -10.10900100 | 1.67183300  | 1.17452100  |
| H | -8.81804500  | 0.75237800  | 2.00621300  |
| C | -8.56692100  | 2.51363500  | -0.99015900 |
| H | -8.07478300  | 2.34843600  | -1.96026100 |
| H | -9.64907200  | 2.64681700  | -1.16292900 |
| H | -8.17377400  | 3.44401200  | -0.54403200 |
| C | -8.81313000  | 0.00163600  | -0.64153300 |
| H | -8.58382100  | -0.83198700 | 0.04527600  |
| H | -9.90645300  | 0.03221400  | -0.79086300 |

|   |             |             |             |
|---|-------------|-------------|-------------|
| H | -8.33173200 | -0.19381500 | -1.61131500 |
| C | 0.86649800  | 4.48515100  | -0.73231000 |
| C | 0.62497300  | 3.11166000  | -0.54347500 |
| C | -0.58129600 | 2.50286900  | -0.93468400 |
| C | -1.55479200 | 3.33631100  | -1.51961200 |
| C | -1.32588100 | 4.70669300  | -1.71927200 |
| C | -0.12053200 | 5.29042600  | -1.32612500 |
| H | 1.42836600  | 2.52677100  | -0.08908700 |
| H | -2.51642100 | 2.91346800  | -1.82613200 |
| H | -2.10086600 | 5.32387500  | -2.18637400 |
| H | 0.06071800  | 6.35606400  | -1.47959900 |
| C | 2.18997100  | 5.02764800  | -0.31025200 |
| O | 2.28618800  | 6.35791900  | -0.47448600 |
| O | 3.10337800  | 4.35773200  | 0.13337100  |
| C | 3.52594300  | 6.96781300  | -0.11185600 |
| H | 4.35189400  | 6.56609500  | -0.72247100 |
| H | 3.40135100  | 8.04319300  | -0.30298900 |
| H | 3.75009000  | 6.79319900  | 0.95360200  |
| B | 1.56537700  | 0.76654000  | -2.96966200 |
| O | 2.84740600  | 0.94850200  | -3.39373700 |
| H | 2.88869500  | 1.26410000  | -4.31206500 |
| O | 0.50433000  | 0.95923100  | -3.80561700 |
| H | -0.34234400 | 0.90406100  | -3.32223100 |
| O | 1.34242400  | 0.33531300  | -1.67299800 |
| H | 2.14025500  | 0.36675500  | -1.07331500 |
| C | 5.57251800  | 0.45487800  | -0.59063700 |
| C | 6.50868500  | -0.51043200 | -0.99481300 |
| C | 5.83611400  | 1.81389400  | -0.85273200 |
| C | 7.69200200  | -0.12487700 | -1.63783900 |
| H | 6.31811800  | -1.57100500 | -0.80826500 |
| C | 7.02194500  | 2.19638400  | -1.48547900 |
| H | 5.10803400  | 2.57925200  | -0.56005500 |
| C | 7.95312500  | 1.22723800  | -1.88126500 |
| H | 8.41350900  | -0.88781300 | -1.94691700 |
| H | 7.21677900  | 3.25609300  | -1.67837200 |
| H | 8.87859100  | 1.52691400  | -2.38275700 |
| C | 4.25594200  | 0.53653000  | 1.97295600  |
| C | 3.23527300  | 1.21377400  | 2.66188700  |
| C | 5.46830200  | 0.27829900  | 2.63884600  |
| C | 3.41031200  | 1.60367100  | 3.99509900  |
| H | 2.29802600  | 1.45146300  | 2.14928200  |
| C | 5.64343300  | 0.66676400  | 3.97056000  |
| H | 6.28721000  | -0.22161400 | 2.11305300  |

|   |             |             |             |
|---|-------------|-------------|-------------|
| C | 4.61336700  | 1.32708400  | 4.65247400  |
| H | 2.60640600  | 2.13169800  | 4.51697100  |
| H | 6.59069500  | 0.45725500  | 4.47713800  |
| H | 4.75350400  | 1.63381100  | 5.69360500  |
| C | -0.59855300 | -3.13482800 | -1.77658100 |
| C | -0.11130600 | -2.61500200 | -2.98689600 |
| C | -0.88532800 | -4.51127100 | -1.69820200 |
| C | 0.10728000  | -3.45328700 | -4.08732300 |
| H | 0.09157500  | -1.54734400 | -3.08304300 |
| C | -0.66228600 | -5.34832000 | -2.79485400 |
| H | -1.30388400 | -4.93612100 | -0.78200900 |
| C | -0.16127600 | -4.82155900 | -3.99207300 |
| H | 0.48422800  | -3.02953000 | -5.02302400 |
| H | -0.88829500 | -6.41612800 | -2.71602200 |
| H | 0.00866600  | -5.47703100 | -4.85171000 |
| C | -2.51245500 | -2.57225800 | 0.29388200  |
| C | -3.58684700 | -2.69445900 | -0.60578800 |
| C | -2.74178600 | -2.81071800 | 1.65877700  |
| C | -4.85593300 | -3.06463800 | -0.15248800 |
| H | -3.43474600 | -2.50473200 | -1.67231900 |
| C | -4.01467200 | -3.17788100 | 2.11230600  |
| H | -1.92585100 | -2.71456700 | 2.37920600  |
| C | -5.07400200 | -3.30845500 | 1.20919300  |
| H | -5.67876400 | -3.16102300 | -0.86754700 |
| H | -4.17456900 | -3.36477600 | 3.17870100  |
| H | -6.06764600 | -3.59924800 | 1.56382300  |

### Int-5

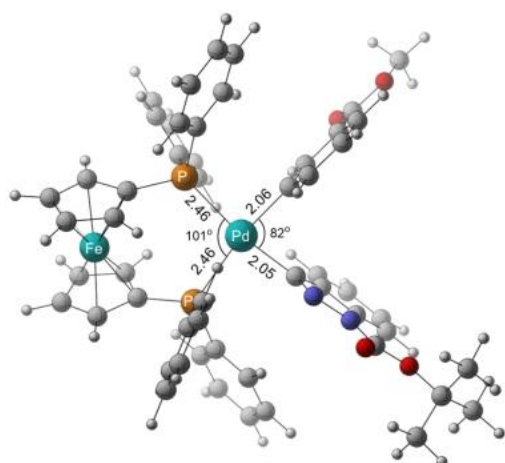

E(RB3LYP) = -4569.28581024

Zero-point correction= 0.884201 (Hartree/Particle)

Thermal correction to Energy= 0.943498

|                                              |              |
|----------------------------------------------|--------------|
| Thermal correction to Enthalpy=              | 0.944442     |
| Thermal correction to Gibbs Free Energy=     | 0.782798     |
| Sum of electronic and zero-point Energies=   | -4568.401609 |
| Sum of electronic and thermal Energies=      | -4568.342312 |
| Sum of electronic and thermal Enthalpies=    | -4568.341368 |
| Sum of electronic and thermal Free Energies= | -4568.503012 |

|   |             |             |             |
|---|-------------|-------------|-------------|
| C | 3.31910900  | -2.16269500 | -1.67935800 |
| C | 4.32362600  | -3.17410000 | -1.63068800 |
| C | 5.30864400  | -2.77457000 | -0.67810000 |
| C | 4.92258600  | -1.51120800 | -0.14004800 |
| C | 3.68154900  | -1.11677000 | -0.75469500 |
| H | 2.42078300  | -2.19116600 | -2.29525700 |
| H | 4.31862200  | -4.10429000 | -2.19948700 |
| H | 6.18994000  | -3.34705600 | -0.38710300 |
| H | 5.45895900  | -0.95951800 | 0.62989000  |
| F | 3.43349400  | -2.89794900 | 0.23739500  |
| C | 3.48094700  | -3.53131600 | 2.22702700  |
| C | 3.23837400  | -4.64541500 | 1.36817800  |
| C | 2.44606600  | -2.57370000 | 2.01226800  |
| H | 4.32598700  | -3.41453200 | 2.90604400  |
| C | 2.04870800  | -4.38580700 | 0.62516900  |
| H | 3.86770200  | -5.53072200 | 1.27182200  |
| C | 1.54383900  | -3.09500100 | 1.01508000  |
| H | 2.36534600  | -1.60495800 | 2.50438300  |
| H | 1.61953600  | -5.03849800 | -0.13297500 |
| P | 0.07079900  | -2.20140800 | 0.39339300  |
| P | 2.68761000  | 0.39436100  | -0.45497200 |
| P | 0.25901100  | 0.19034900  | -0.15293600 |
| C | -3.85213000 | 0.80698300  | 0.95324100  |
| C | -2.47374000 | 0.85554000  | 1.27359000  |
| C | -2.05768900 | 1.32293200  | 2.53051800  |
| C | -3.02273500 | 1.73760100  | 3.44590100  |
| C | -4.39266500 | 1.68772800  | 3.11098200  |
| C | -4.83154600 | 1.22477800  | 1.86967100  |
| C | -1.76573200 | 0.35837700  | 0.10294400  |
| H | -0.99345800 | 1.35687300  | 2.78003500  |
| H | -2.72143500 | 2.10639900  | 4.43097600  |
| H | -5.13521700 | 2.02015500  | 3.84349800  |
| H | -5.89151200 | 1.19038600  | 1.62547100  |
| N | -2.63072400 | 0.04149200  | -0.82996000 |
| N | -3.91343000 | 0.29804500  | -0.34475100 |
| C | -5.00341600 | 0.01195800  | -1.17461900 |

|   |             |             |             |
|---|-------------|-------------|-------------|
| O | -6.14511000 | 0.32481800  | -0.55693400 |
| O | -4.88540200 | -0.45274600 | -2.28504300 |
| C | -7.46624500 | 0.12918700  | -1.18715300 |
| C | -8.43388600 | 0.62355000  | -0.10946500 |
| H | -8.24220700 | 1.68338100  | 0.13114100  |
| H | -9.47385700 | 0.52964600  | -0.46557300 |
| H | -8.32692400 | 0.02928200  | 0.81429800  |
| C | -7.57219300 | 0.99243600  | -2.44833800 |
| H | -6.87222600 | 0.65376800  | -3.22661600 |
| H | -8.59931500 | 0.93312300  | -2.84855500 |
| H | -7.35730400 | 2.04906500  | -2.21048700 |
| C | -7.68859700 | -1.35920800 | -1.47403700 |
| H | -7.55342400 | -1.95292800 | -0.55282600 |
| H | -8.72122400 | -1.51361200 | -1.83248600 |
| H | -6.99188100 | -1.72899100 | -2.24104800 |
| C | -0.27581700 | 2.50666200  | -2.02390200 |
| C | 0.06740500  | 2.17241000  | -0.69903100 |
| C | 0.23500100  | 3.23380000  | 0.20349500  |
| C | 0.07727500  | 4.57763000  | -0.19035500 |
| C | -0.26190300 | 4.88217300  | -1.51924200 |
| C | -0.43638500 | 3.83861200  | -2.43056500 |
| H | -0.43035300 | 1.71374500  | -2.76373600 |
| H | 0.49680600  | 3.04860400  | 1.24814000  |
| H | -0.38869600 | 5.92155500  | -1.82824500 |
| H | -0.70366300 | 4.06164000  | -3.46904400 |
| C | 0.27868300  | 5.63780600  | 0.83792000  |
| O | 0.09052000  | 6.87952200  | 0.35355400  |
| O | 0.58152200  | 5.43097400  | 1.99674400  |
| C | 0.26241800  | 7.96180800  | 1.26842300  |
| H | -0.44861900 | 7.88143300  | 2.10775800  |
| H | 1.28939300  | 7.97505400  | 1.67055000  |
| H | 0.06835600  | 8.87865400  | 0.69350000  |
| C | 3.24979200  | 1.50868200  | -1.82835800 |
| C | 3.34958900  | 2.89745200  | -1.62996200 |
| C | 3.50868600  | 0.99188100  | -3.10989700 |
| C | 3.71433300  | 3.74365800  | -2.68174400 |
| H | 3.14300500  | 3.32887600  | -0.64804600 |
| C | 3.86827300  | 1.84056500  | -4.16299500 |
| H | 3.43944600  | -0.08206100 | -3.29838600 |
| C | 3.97497100  | 3.21895200  | -3.95240200 |
| H | 3.79236900  | 4.82075600  | -2.50450400 |
| H | 4.07007600  | 1.41710000  | -5.15176200 |
| H | 4.26024500  | 3.88197200  | -4.77495300 |

|             |             |             |             |
|-------------|-------------|-------------|-------------|
| C           | 3.46647900  | 1.13688700  | 1.04674700  |
| C           | 4.78901600  | 1.61846300  | 1.04596300  |
| C           | 2.71709700  | 1.21871400  | 2.23249700  |
| C           | 5.34934300  | 2.15538100  | 2.20861800  |
| H           | 5.38734800  | 1.58327200  | 0.13150700  |
| C           | 3.27837800  | 1.75599500  | 3.39698600  |
| H           | 1.68119900  | 0.86470900  | 2.24196000  |
| C           | 4.59598100  | 2.22336700  | 3.38719800  |
| H           | 6.37913800  | 2.52502900  | 2.19276600  |
| H           | 2.67999500  | 1.81348500  | 4.31104100  |
| H           | 5.03560900  | 2.64679700  | 4.29541300  |
| C           | -0.43432600 | -3.15705900 | -1.10400000 |
| C           | -0.87412200 | -4.49166600 | -1.02631100 |
| C           | -0.37975100 | -2.53266700 | -2.36122500 |
| C           | -1.23156600 | -5.18896100 | -2.18395000 |
| H           | -0.94813500 | -4.99150600 | -0.05656100 |
| C           | -0.73738500 | -3.23134500 | -3.52036600 |
| H           | -0.06776900 | -1.48581900 | -2.43094200 |
| C           | -1.16080000 | -4.56109800 | -3.43377900 |
| H           | -1.57046200 | -6.22672200 | -2.10869900 |
| H           | -0.69140800 | -2.73004900 | -4.49174300 |
| H           | -1.44406200 | -5.10757600 | -4.33858800 |
| C           | -1.22368300 | -2.65979800 | 1.64119100  |
| C           | -2.57539300 | -2.74635500 | 1.26025100  |
| C           | -0.89015800 | -2.85795300 | 2.99223000  |
| C           | -3.56404600 | -3.03635100 | 2.20538600  |
| H           | -2.86234100 | -2.58858100 | 0.21812900  |
| C           | -1.88216000 | -3.14280000 | 3.93770600  |
| H           | 0.15080400  | -2.79992100 | 3.31915400  |
| C           | -3.22186100 | -3.23475000 | 3.54780500  |
| H           | -4.60919500 | -3.10595300 | 1.88820700  |
| H           | -1.60121900 | -3.29815700 | 4.98399300  |
| H           | -3.99683400 | -3.46138000 | 4.28645400  |
| <b>TS-3</b> |             |             |             |

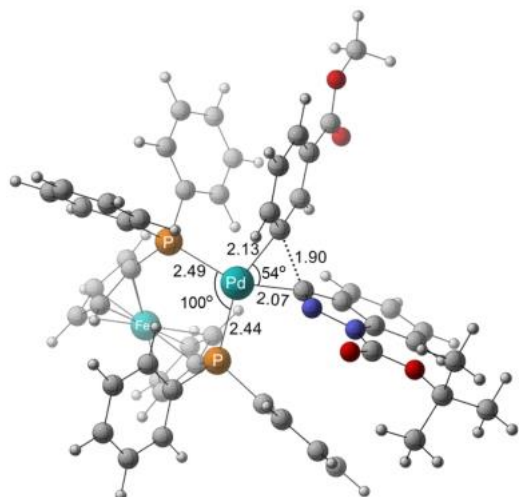

E(RB3LYP) = -4569.26261718

Zero-point correction= 0.882502 (Hartree/Particle)

Thermal correction to Energy= 0.941508

Thermal correction to Enthalpy= 0.942453

Thermal correction to Gibbs Free Energy= 0.781888

Sum of electronic and zero-point Energies= -4568.380115

Sum of electronic and thermal Energies= -4568.321109

Sum of electronic and thermal Enthalpies= -4568.320165

Sum of electronic and thermal Free Energies= -4568.480730

|   |             |             |             |
|---|-------------|-------------|-------------|
| C | 3.88858600  | -2.34145300 | -0.37845000 |
| C | 4.81966400  | -3.06861300 | 0.42194000  |
| C | 5.26209300  | -2.21104000 | 1.47453100  |
| C | 4.61515000  | -0.94770700 | 1.31887800  |
| C | 3.76027500  | -1.01468900 | 0.16662900  |
| H | 3.36618300  | -2.72520500 | -1.25441500 |
| H | 5.11573900  | -4.10725400 | 0.27101000  |
| H | 5.95728000  | -2.47713300 | 2.27147600  |
| H | 4.73834900  | -0.08386100 | 1.97049500  |
| F | 3.19425800  | -2.44937900 | 1.56274400  |
| C | 2.49399100  | -2.58338800 | 3.52612000  |
| C | 2.65023200  | -3.89011000 | 2.97039500  |
| C | 1.57585700  | -1.86342800 | 2.70638600  |
| H | 3.00844000  | -2.19337600 | 4.40485500  |
| C | 1.82503300  | -3.98359900 | 1.81003900  |
| H | 3.30956800  | -4.67274700 | 3.34747600  |
| C | 1.14874100  | -2.72591800 | 1.63370100  |
| H | 1.25322100  | -0.83226300 | 2.85315900  |
| H | 1.74845200  | -4.84912600 | 1.15357500  |
| P | -0.02499500 | -2.18261000 | 0.34185100  |



|   |             |             |             |
|---|-------------|-------------|-------------|
| P | 2.68034600  | 0.30428900  | -0.53543900 |
| P | 0.21239300  | 0.16819000  | -0.26900500 |
| C | -3.78810000 | 0.87707500  | 0.90084000  |
| C | -2.40835200 | 1.03346300  | 1.16765800  |
| C | -1.96629300 | 1.25158300  | 2.48189400  |
| C | -2.91070300 | 1.33569400  | 3.50352500  |
| C | -4.28473400 | 1.19723100  | 3.21917100  |
| C | -4.74667800 | 0.96220200  | 1.92375600  |
| C | -1.73014700 | 0.87778400  | -0.12039300 |
| H | -0.89893000 | 1.33970400  | 2.70134900  |
| H | -2.58655400 | 1.50633400  | 4.53435000  |
| H | -5.01101500 | 1.26760400  | 4.03504000  |
| H | -5.80847500 | 0.84467100  | 1.71801200  |
| N | -2.63095100 | 0.63642400  | -1.06019300 |
| N | -3.88266700 | 0.63701200  | -0.47316500 |
| C | -4.99309900 | 0.40088500  | -1.29372900 |
| O | -6.11521200 | 0.44152700  | -0.57203500 |
| O | -4.90105700 | 0.19028700  | -2.48129600 |
| C | -7.44895100 | 0.23416400  | -1.17205600 |
| C | -8.38792900 | 0.37404000  | 0.02819900  |
| H | -8.29007500 | 1.37316800  | 0.48647600  |
| H | -9.43423300 | 0.24024900  | -0.29504200 |
| H | -8.15987300 | -0.38733800 | 0.79383600  |
| C | -7.72588100 | 1.32801700  | -2.20824200 |
| H | -7.04662600 | 1.24567500  | -3.06984800 |
| H | -8.76510700 | 1.23673300  | -2.56934000 |
| H | -7.60705900 | 2.32739100  | -1.75401900 |
| C | -7.53629800 | -1.17423300 | -1.76847000 |
| H | -7.28008800 | -1.93124100 | -1.00625800 |
| H | -8.56913200 | -1.36581500 | -2.10779900 |
| H | -6.85757700 | -1.28944700 | -2.62660000 |
| C | -0.55176200 | 2.55433700  | -2.01854400 |
| C | -0.43718900 | 2.16250600  | -0.66151500 |
| C | -0.14282200 | 3.17517900  | 0.27137800  |
| C | 0.06233800  | 4.50918000  | -0.12394200 |
| C | -0.02209600 | 4.86191000  | -1.47965000 |
| C | -0.33133500 | 3.87139300  | -2.42051000 |
| H | -0.84649300 | 1.81063400  | -2.76440500 |
| H | -0.06961800 | 2.95255100  | 1.33614300  |
| H | 0.13600900  | 5.89638000  | -1.78913300 |
| H | -0.41281600 | 4.13426100  | -3.48017600 |
| C | 0.36200400  | 5.51182000  | 0.93961100  |
| O | 0.58271600  | 6.74332600  | 0.44789100  |

|   |             |             |             |
|---|-------------|-------------|-------------|
| O | 0.40746200  | 5.26521000  | 2.12858600  |
| C | 0.87716300  | 7.77264500  | 1.39318300  |
| H | 0.03955700  | 7.90712200  | 2.09794600  |
| H | 1.78919300  | 7.52890400  | 1.96321300  |
| H | 1.02966000  | 8.68906900  | 0.80543000  |
| C | 0.19814000  | -3.39447700 | -1.04056400 |
| C | -0.12056200 | -4.75845400 | -0.90169500 |
| C | 0.67394900  | -2.93425500 | -2.27948400 |
| C | 0.05676800  | -5.64203700 | -1.97042800 |
| H | -0.52114700 | -5.13551500 | 0.04359700  |
| C | 0.84905600  | -3.81825700 | -3.35140700 |
| H | 0.90340600  | -1.87206400 | -2.40865500 |
| C | 0.54479700  | -5.17423200 | -3.19726200 |
| H | -0.19249000 | -6.70044100 | -1.84634800 |
| H | 1.21904600  | -3.44180700 | -4.30989200 |
| H | 0.67875100  | -5.86648700 | -4.03422600 |
| C | -1.66477100 | -2.70929200 | 1.02505700  |
| C | -1.85459600 | -3.02324100 | 2.38094600  |
| C | -2.77691000 | -2.73702600 | 0.16221800  |
| C | -3.12468100 | -3.36587400 | 2.86182700  |
| H | -1.00798700 | -3.00783300 | 3.07211300  |
| C | -4.04206400 | -3.08592600 | 0.64198100  |
| H | -2.65633300 | -2.48857100 | -0.89639700 |
| C | -4.22104100 | -3.40062500 | 1.99502600  |
| H | -3.25299000 | -3.61143400 | 3.92076400  |
| H | -4.89404900 | -3.10990700 | -0.04489300 |
| H | -5.21230000 | -3.67255600 | 2.37067700  |
| C | 3.33275100  | 0.40496800  | -2.26558800 |
| C | 4.68239800  | 0.16113700  | -2.58302200 |
| C | 2.44092600  | 0.72177900  | -3.30392600 |
| C | 5.12688600  | 0.24159600  | -3.90608800 |
| H | 5.39373100  | -0.09639700 | -1.79348500 |
| C | 2.88601300  | 0.80381700  | -4.62880300 |
| H | 1.38791400  | 0.90263200  | -3.07352000 |
| C | 4.22977200  | 0.56396000  | -4.93222200 |
| H | 6.17927100  | 0.04953600  | -4.13722300 |
| H | 2.17717100  | 1.05074000  | -5.42502000 |
| H | 4.57890400  | 0.62315900  | -5.96774700 |
| C | 3.36039500  | 1.81206000  | 0.30047500  |
| C | 4.24791800  | 2.71215200  | -0.31192700 |
| C | 2.93257400  | 2.07530300  | 1.61538500  |
| C | 4.70998600  | 3.83763700  | 0.38138600  |
| H | 4.58634100  | 2.54195900  | -1.33662500 |

|   |            |            |             |
|---|------------|------------|-------------|
| C | 3.40573800 | 3.19066400 | 2.31248900  |
| H | 2.21644200 | 1.40378000 | 2.09911800  |
| C | 4.29711200 | 4.07658200 | 1.69601500  |
| H | 5.39983600 | 4.52945600 | -0.11206700 |
| H | 3.06358400 | 3.37671000 | 3.33481300  |
| H | 4.66203600 | 4.95515400 | 2.23691700  |
